# Supplementary material for: Feasibility of a web-based neurocognitive battery for assessing cognitive function in critical illness survivors
Source: PLoS One. 2019 Apr 12;14(4):e0215203. doi: 10.1371/journal.pone.0215203 (PMC6461230; doi:10.1371/journal.pone.0215203)
Supplement: S1 Table — (XLSX) [file pone.0215203.s001.xlsx]

## Sheet: SCORES- VIC
Unable/refused to complete
PATIENT: 01-001						PATIENT: 01-002 (lost to follow up)						PATIENT: 01-003
TEST	1st ATTEMPT	SCORE	2nd ATTEMPT	SCORE		TEST	1st ATTEMPT	SCORE				TEST	1st ATTEMPT	SCORE
The Monkey Ladder Test	March 17.2017	3	March 27.2017	5		The Monkey Ladder Test	March 21/2017	6				The Monkey Ladder Test	April 5.2017	6
The Grammatical Reasoning Test	March 17.2017	1	March 27.2017	3		The Grammatical Reasoning Test	March 21/2017	-3				The Grammatical Reasoning Test	April 5.2017	2
The Double Truoble Test	March 17.2017	-4	March 27.2017	1		The Double Truoble Test	March 21/2017	0				The Double Truoble Test	April 5.2017	8
The Odd One Out Test	March 17.2017	1	March 27.2017	11		The Odd One Out Test	March 21/2017	9				The Odd One Out Test	April 5.2017	13
The Spatial Span Test	March 17.2017	0	March 27.2017	3		The Spatial Span Test						The Spatial Span Test	April 5.2017	6
The Rotation Test	March 17.2017	4	March 27.2017	11		The Rotation Test						The Rotation Test	April 5.2017	52
The Feature Match Test	March 17.2017	12				The Feature Match Test						The Feature Match Test	April 6. 2017	68
The Digit Span Test	March 17.2017	3				The Digit Span Test						The Digit Span Test	April 6. 2017	6
The Hampshire Tree Test	March 17.2017	1				The Hampshire Tree Test						The Hampshire Tree Test	April 6. 2017	19
The Paired Association Test	March 17.2017	3				The Paired Association Test						The Paired Association Test	April 6. 2017	6
The Polygons Test	March 17.2017	-3				The Polygons Test						The Polygons Test	April 6. 2017	5
The Spatial Search Test	March 17.2017	3				The Spatial Search Test						The Spatial Search Test	April 6. 2017	8
TOTAL SCORE		24		34		TOTAL SCORE		12				TOTAL SCORE		199
PATIENT: 01-004						PATIENT: 01-005						PATIENT: 01-006
TEST	1st ATTEMPT	SCORE	2nd ATTEMPT	SCORE		TEST	1st ATTEMPT	SCORE				TEST	1st ATTEMPT	SCORE	2nd ATTEMPT	SCORE
The Monkey Ladder Test	March 27.2017	2	March 31.2017	6		The Monkey Ladder Test	June 5. 2017	3				The Monkey Ladder Test	May 23. 2017	0	May 29. 2017	5
The Grammatical Reasoning Test	March 27.2017	7	March 31.2017	6		The Grammatical Reasoning Test	June 5. 2017	3				The Grammatical Reasoning Test	May 23. 2017	-1	May 29. 2017	3
The Double Truoble Test	March 27.2017	4	March 31.2017	-1		The Double Truoble Test	June 5. 2017	-1				The Double Truoble Test	May 23. 2017	6	May 29. 2017	5
The Odd One Out Test	March 27.2017	12	March 31.2017	1		The Odd One Out Test	June 5. 2017	-4				The Odd One Out Test	May 23. 2017	-18	May 29. 2017	-21
The Spatial Span Test						The Spatial Span Test	June 5. 2017	4				The Spatial Span Test	May 23. 2017	4	May 29. 2017	5
The Rotation Test						The Rotation Test	June 5. 2017	17				The Rotation Test	May 23. 2017	-3	May 29. 2017	-11
The Feature Match Test						The Feature Match Test	June 5. 2017	42				The Feature Match Test	May 23. 2017	23	May 29. 2017	35
The Digit Span Test						The Digit Span Test	June 5. 2017	4				The Digit Span Test	May 23. 2017	4	May 29. 2017	5
The Hampshire Tree Test						The Hampshire Tree Test	June 5. 2017	0				The Hampshire Tree Test	May 23. 2017	14	May 29. 2017	17
The Paired Association Test						The Paired Association Test	June 5. 2017	5				The Paired Association Test	May 23. 2017	3	May 29. 2017	3
The Polygons Test						The Polygons Test	June 5. 2017	-2				The Polygons Test	May 23. 2017	1	May 29. 2017	-12
The Spatial Search Test						The Spatial Search Test	June 5. 2017	3				The Spatial Search Test	May 23. 2017	2	May 29. 2017	0
TOTAL SCORE		25		12		TOTAL SCORE		74				TOTAL SCORE		35		34
PATIENT: 01-007						PATIENT 01-008 was not intubated therefore we did not use data						PATIENT: 01-009
TEST	1st ATTEMPT	SCORE	2nd ATTEMPT	SCORE								TEST	1st ATTEMPT	SCORE
The Monkey Ladder Test	May 24. 2017	5	May 29. 2017	6								The Monkey Ladder Test	June 21. 2017	2
The Grammatical Reasoning Test	May 24. 2017	5	May 29. 2017	10								The Grammatical Reasoning Test	June 21. 2017	0
The Double Truoble Test	May 24. 2017	1	May 29. 2017	-8								The Double Truoble Test	June 21. 2017	0
The Odd One Out Test	May 24. 2017	9	May 29. 2017	7								The Odd One Out Test	June 21. 2017	7
The Spatial Span Test	May 24. 2017	4	May 29. 2017	4								The Spatial Span Test	June 21. 2017	3
The Rotation Test	May 24. 2017	-1	May 29. 2017	23								The Rotation Test	June 21. 2017	-2
The Feature Match Test	May 24. 2017	64	May 29. 2017	36								The Feature Match Test	June 21. 2017	4
The Digit Span Test	May 24. 2017	5	May 29. 2017	6								The Digit Span Test	June 21. 2017	0
The Hampshire Tree Test	May 24. 2017	3	May 29. 2017	0								The Hampshire Tree Test	June 21. 2017	0
The Paired Association Test	May 24. 2017	4	May 29. 2017	3								The Paired Association Test	June 21. 2017	2
The Polygons Test	May 24. 2017	10	May 29. 2017	-6								The Polygons Test	June 21. 2017	4
The Spatial Search Test	May 24. 2017	2	May 29. 2017	4								The Spatial Search Test	June 21. 2017	4
TOTAL SCORE		111		85								TOTAL SCORE		24
PATIENT: 01-010						PATIENT: 01-011						PATIENT: 01-012
TEST	1st ATTEMPT	SCORE				TEST	1st ATTEMPT	SCORE	2nd ATTEMPT	SCORE		TEST	1st ATTEMPT	SCORE
The Monkey Ladder Test	June 22. 2017	4				The Monkey Ladder Test	July 17. 2017	6	July 26. 2017	6		The Monkey Ladder Test	July 21. 2017	4
The Grammatical Reasoning Test	June 22. 2017	1				The Grammatical Reasoning Test	July 17. 2017	5	July 26. 2017	5		The Grammatical Reasoning Test	July 21. 2017	1
The Double Truoble Test	June 22. 2017	6				The Double Truoble Test	July 17. 2017	2	July 26. 2017	0		The Double Truoble Test	July 21. 2017	4
The Odd One Out Test	June 22. 2017	7				The Odd One Out Test	July 17. 2017	4	July 26. 2017	9		The Odd One Out Test	July 21. 2017	6
The Spatial Span Test	June 22. 2017	4				The Spatial Span Test	July 17. 2017	3	July 26. 2017	3		The Spatial Span Test	July 21. 2017	0
The Rotation Test	June 22. 2017	18				The Rotation Test	July 17. 2017	18	July 26. 2017	16		The Rotation Test	July 21. 2017	13
The Feature Match Test	June 22. 2017	36				The Feature Match Test	July 17. 2017	28	July 26. 2017	48		The Feature Match Test	July 21. 2017	9
The Digit Span Test	June 22. 2017	5				The Digit Span Test	July 17. 2017	4	July 26. 2017	5		The Digit Span Test	July 21. 2017	4
The Hampshire Tree Test	June 22. 2017	3				The Hampshire Tree Test	July 17. 2017	0	July 26. 2017	3		The Hampshire Tree Test	July 21. 2017	10
The Paired Association Test	June 22. 2017	3				The Paired Association Test	July 17. 2017	3	July 26. 2017	3		The Paired Association Test	July 21. 2017	3
The Polygons Test	June 22. 2017	-4				The Polygons Test	July 17. 2017	3	July 26. 2017	3		The Polygons Test	July 21. 2017	7
The Spatial Search Test	June 22. 2017	3				The Spatial Search Test	July 17. 2017	4	July 26. 2017	2		The Spatial Search Test	July 21. 2017	3
TOTAL SCORE		86				TOTAL SCORE		80		103		TOTAL SCORE		64
PATIENT: 01-013						PATIENT: 01-015						PATIENT: 01-018
TEST	1st ATTEMPT	SCORE				TEST	1st ATTEMPT	SCORE				TEST	1st ATTEMPT	SCORE
The Monkey Ladder Test	July 24. 2017	6				The Monkey Ladder Test	July 24. 2017	7				The Monkey Ladder Test	July 24. 2017	5
The Grammatical Reasoning Test	July 24. 2017	5				The Grammatical Reasoning Test	July 24. 2017	6				The Grammatical Reasoning Test	July 24. 2017	5
The Double Truoble Test	July 24. 2017	1	l			The Double Truoble Test	July 24. 2017	6				The Double Truoble Test	July 24. 2017	6
The Odd One Out Test	July 24. 2017	7				The Odd One Out Test	July 24. 2017	10				The Odd One Out Test	July 24. 2017	-1
The Spatial Span Test	July 24. 2017	5				The Spatial Span Test	July 24. 2017	3				The Spatial Span Test	July 24. 2017	4
The Rotation Test	July 24. 2017	8				The Rotation Test	July 24. 2017	69				The Rotation Test	July 24. 2017	13
The Feature Match Test	July 24. 2017	37				The Feature Match Test	July 24. 2017	92				The Feature Match Test	July 24. 2017	63
The Digit Span Test	July 24. 2017	15				The Digit Span Test	July 24. 2017	4				The Digit Span Test	July 24. 2017	5
The Hampshire Tree Test	July 24. 2017	6				The Hampshire Tree Test	July 24. 2017	18				The Hampshire Tree Test	July 24. 2017	0
The Paired Association Test	July 24. 2017	3				The Paired Association Test	July 24. 2017	2				The Paired Association Test	July 24. 2017	2
The Polygons Test	July 24. 2017	13				The Polygons Test	July 24. 2017	24				The Polygons Test	July 24. 2017	-7
The Spatial Search Test	July 24. 2017	4				The Spatial Search Test	July 24. 2017	7				The Spatial Search Test	July 24. 2017	3
TOTAL SCORE		110				TOTAL SCORE		248				TOTAL SCORE		98
						added 01-015

## Sheet: SCORES- UH
PATIENT: 02-001						PATIENT: 02-002						PATIENT: 02-003
TEST	1st ATTEMPT	SCORE	2nd ATTEMPT	SCORE		TEST	1st ATTEMPT	SCORE	2nd ATTEMPT	SCORE		TEST	1st ATTEMPT	SCORE
The Monkey Ladder Test	Dec. 21/2016	5	April 11/2017	5		The Monkey Ladder Test	Jan. 17/2017	6	April 25/2017	8		The Monkey Ladder Test	Jan. 27/2017	6
The Grammatical Reasoning Test	Dec. 21/2016	5	April 11/2017	5		The Grammatical Reasoning Test	Jan. 17/2017	8	April 25/2017	12		The Grammatical Reasoning Test	Jan. 27/2017	5
The Double Truoble Test	Dec. 21/2016	10	April 11/2017	10		The Double Truoble Test	Jan. 17/2017	7	April 25/2017	20		The Double Truoble Test	Jan. 27/2017	2
The Odd One Out Test	Dec. 21/2016	3	April 11/2017	9		The Odd One Out Test	Jan. 17/2017	6	April 25/2017	14		The Odd One Out Test	Jan. 27/2017	9
The Spatial Span Test	Dec. 21/2016	3	April 11/2017	3		The Spatial Span Test	Jan. 17/2017	4	April 25/2017	5		The Spatial Span Test	Jan. 27/2017	4
The Rotation Test	Dec. 21/2016	53	April 11/2017	60		The Rotation Test	Jan. 17/2017	23	April 25/2017	88		The Rotation Test	Jan. 27/2017	17
The Feature Match Test	Dec. 21/2016	56	April 11/2017	90		The Feature Match Test	Jan. 17/2017	72	April 25/2017	100		The Feature Match Test
The Digit Span Test	Dec. 21/2016	5	April 11/2017	4		The Digit Span Test	Jan. 17/2017	5	April 25/2017	5		The Digit Span Test
The Hampshire Tree Test	Dec. 21/2016	19	April 11/2017	14		The Hampshire Tree Test	Jan. 17/2017	17	April 25/2017	17		The Hampshire Tree Test
The Paired Association Test	Dec. 21/2016	3	April 11/2017	3		The Paired Association Test	Jan. 17/2017	4	April 25/2017	5		The Paired Association Test
The Polygons Test	Dec. 21/2016	4	April 11/2017	5		The Polygons Test	Jan. 17/2017	33	April 25/2017	23		The Polygons Test
The Spatial Search Test	Dec. 21/2016	5	April 11/2017	6		The Spatial Search Test	Jan. 17/2017	3	April 25/2017	7		The Spatial Search Test
TOTAL SCORE		171		214		TOTAL SCORE		188		304		TOTAL SCORE		43
PATIENT: 02-004						PATIENT: 02-005						PATIENT: 02-006
TEST	1st ATTEMPT	SCORE				TEST	1st ATTEMPT	SCORE				TEST	1st ATTEMPT	SCORE
The Monkey Ladder Test	Feb. 11/2017	5				The Monkey Ladder Test	June 6/2017	4				The Monkey Ladder Test	July 24/2017	5
The Grammatical Reasoning Test	Feb. 11/2017	5				The Grammatical Reasoning Test	June 6/2017	7				The Grammatical Reasoning Test	July 24/2017	3
The Double Truoble Test	Feb. 11/2017	13				The Double Truoble Test	June 6/2017	5				The Double Truoble Test	July 24/2017	-1
The Odd One Out Test	Feb. 11/2017	9				The Odd One Out Test	June 6/2017	-2				The Odd One Out Test	July 24/2017	-9
The Spatial Span Test	Feb. 11/2017	4				The Spatial Span Test	June 6/2017	2				The Spatial Span Test	July 24/2017	5
The Rotation Test	Feb. 11/2017	78				The Rotation Test	June 6/2017	20				The Rotation Test	July 24/2017	-10
The Feature Match Test	Feb. 11/2017	84				The Feature Match Test	June 6/2017	18				The Feature Match Test	July 24/2017	72
The Digit Span Test	Feb. 11/2017	4				The Digit Span Test	June 6/2017					The Digit Span Test	July 24/2017	4
The Hampshire Tree Test	Feb. 11/2017	14				The Hampshire Tree Test	June 6/2017					The Hampshire Tree Test	July 24/2017	10
The Paired Association Test	Feb. 11/2017	4				The Paired Association Test	June 6/2017					The Paired Association Test	July 24/2017	3
The Polygons Test	Feb. 11/2017	29				The Polygons Test	June 6/2017					The Polygons Test	July 24/2017	15
The Spatial Search Test	Feb. 11/2017	7				The Spatial Search Test	June 6/2017					The Spatial Search Test	June 6/2017	6
TOTAL SCORE		256				TOTAL SCORE		54				TOTAL SCORE		103
PATIENT: 02-007
TEST	1st ATTEMPT	SCORE
The Monkey Ladder Test	July 26/2017	10
The Grammatical Reasoning Test	July 26/2017	10
The Double Truoble Test	July 26/2017	35
The Odd One Out Test	July 26/2017	8
The Spatial Span Test	July 26/2017	6
The Rotation Test	July 26/2017	64
The Feature Match Test	July 26/2017	143
The Digit Span Test	July 26/2017	6
The Hampshire Tree Test	July 26/2017	7
The Paired Association Test	July 26/2017	3
The Polygons Test	July 26/2017	48
The Spatial Search Test	July 26/2017	7
TOTAL SCORE		347

## Sheet: RAW DATA
Trial	Batch User	Batch	Batch Page	Test	Batch Session	Single Score	Single Score Raw	Raw Data	Load Count	Created At	Updated At	User Agent	Browser	Os	Device Type
751	70228	1627	15111	853	39500	3	2.5	Task duration 109729 AvgCorrect 2.5 MaxScore 3 6.gif 2704 Token 1 of 4 7.gif 3000 Response 1 of 3 Empty 15.gif 1519 Response 2 of 3 Empty 11.gif 841 Token 2 of 4 6.gif 5995 Response 1 of 2 Found ERROR! 6.gif 2781 Response 1 of 2 Empty 1.gif 872 Token 1 of 3 22.gif 1948 Token 2 of 3 1.gif 9467 Response 1 of 1 Found ERROR! 19.gif 2471 Token 1 of 2 22.gif 6040 Token 2 of 2 completed 18.gif 2191 Resp…	2		2017-11-15 00:04:42 UTC	2017-11-15 00:06:45 UTC	Mozilla/5.0 (Macintosh; Intel Mac OS X 10_12_5) AppleWebKit/603.2.4 (KHTML, like Gecko) Version/10.1.1 Safari/603.2.4	Safari	Mac OS X
751	70228	1627	15109	851	39500	-7	Attempted 15 Errors 10 Max 2 Score -7 CorrectScore 7	Task duration 95779 OverallScore -7 Attempted 15 Errors 10 Max 2 Score -7 CorrectScore 7 TypeOfTrial ShapeTypeRight ShapeTypeLeft CopyingWhichSide Feedback CurrentScore RT Mismatch 3 4 Left CORRECT 1 4454 Match 5 4 Left INCORRECT! 0 3967 Mismatch 4 4 Right INCORRECT! -1 3398 Match 3 3 Right CORRECT 0 5678 Match 3 3 Right CORRECT 1 4885 Mismatch 6 3 Right INCORRECT! -1 6183 Match 4 5 Right CORRECT…	2		2017-11-14 23:59:01 UTC	2017-11-15 00:00:49 UTC	Mozilla/5.0 (Macintosh; Intel Mac OS X 10_12_5) AppleWebKit/603.2.4 (KHTML, like Gecko) Version/10.1.1 Safari/603.2.4	Safari	Mac OS X
751	70228	1627	15107	850	39500	2	2	Task duration 83056 MaxScore: 2 MeanScore 2 TargetString ResponseString RT Feedback 1423 1423 17638 Correct 22219 22 2626 Incorrect 86 6 4972 Incorrect 1410 1410 11109 Correct 131821 18 3660 Incorrect	2		2017-11-14 23:57:46 UTC	2017-11-14 23:57:21 UTC	Mozilla/5.0 (Macintosh; Intel Mac OS X 10_12_5) AppleWebKit/603.2.4 (KHTML, like Gecko) Version/10.1.1 Safari/603.2.4	Safari	Mac OS X
751	70228	1627	15105	855	39500	0	0	Task duration 187065 Batch: Song: OverallScore 0 DifficultyLevel Feedback MovesMade RT 1 Failed! 6 74148	2		2017-11-14 23:51:07 UTC	2017-11-14 23:54:26 UTC	Mozilla/5.0 (Macintosh; Intel Mac OS X 10_12_5) AppleWebKit/603.2.4 (KHTML, like Gecko) Version/10.1.1 Safari/603.2.4	Safari	Mac OS X
751	70228	1627	15103	844	39500	5	3.5	Task duration 82049 MaxScore 5 MeanScore 3.5 TargetString ResponseString RT Feedback 1458 1657 7571 INCORRECT! 958 095 8769 INCORRECT! 72 72 2404 CORRECT! 091 091 2904 CORRECT! 4692 4692 4621 CORRECT! 74083 74083 5240 CORRECT! 591268 529156 7022 INCORRECT!	2		2017-11-14 23:47:43 UTC	2017-11-14 23:49:21 UTC	Mozilla/5.0 (Macintosh; Intel Mac OS X 10_12_5) AppleWebKit/603.2.4 (KHTML, like Gecko) Version/10.1.1 Safari/603.2.4	Safari	Mac OS X
751	70228	1627	15101	846	39500	63	Attempted 17 Errors 1 Max 8 Score 63 CorrectScore 72	Task duration 95554 OverallScore 63 Attempted 17 Errors 1 Max 8 Score 63 CorrectScore 72 TrialType FeedbackText.text CurrentScore RT Matched CORRECT 1 5117 Matched CORRECT 2 1803 Mismatched CORRECT 4 2572 Matched CORRECT 6 2774 Matched CORRECT 9 3381 Mismatched CORRECT 12 4046 Matched CORRECT 16 3063 Mismatched CORRECT 20 4523 Mismatched CORRECT 25 3698 Matched CORRECT 30 4214 Mismatched CORRECT …	2		2017-11-14 23:47:06 UTC	2017-11-14 23:46:43 UTC	Mozilla/5.0 (Macintosh; Intel Mac OS X 10_12_5) AppleWebKit/603.2.4 (KHTML, like Gecko) Version/10.1.1 Safari/603.2.4	Safari	Mac OS X
751	70228	1627	15099	852	39500	13	Attempted 7 Errors 2 Max 5 Score 13 CorrectScore 23	Task duration: 95299 OverallScore 13 Attempted 7 Errors 2 Max 5 Score 13 CorrectScore 23 TrialType Angle Feedback Score RT Match 270 CORRECT 4 10735 Mismatch 90 CORRECT 8 5198 Mismatch 180 INCORRECT! 3 5570 Match 180 CORRECT 8 8006 Match 180 INCORRECT! 3 15180 Match 270 CORRECT 8 9241 Match 180 CORRECT 13 9734	2		2017-11-14 23:41:43 UTC	2017-11-14 23:43:31 UTC	Mozilla/5.0 (Macintosh; Intel Mac OS X 10_12_5) AppleWebKit/603.2.4 (KHTML, like Gecko) Version/10.1.1 Safari/603.2.4	Safari	Mac OS X
751	70228	1627	15097	854	39500	4	3.66667	Task duration 90495 MaxScore 4 MeanScore 3.6666666666666665 TargetString ResponseString RT Feedback 51108 5168 5239 INCORRECT! 111215 111215 4463 CORRECT! 1294 1294 4351 CORRECT! 137248 137148 5779 INCORRECT! 17410 17410 4585 CORRECT! 4810133 486132 7427 INCORRECT!	2		2017-11-14 23:40:08 UTC	2017-11-14 23:42:26 UTC	Mozilla/5.0 (Macintosh; Intel Mac OS X 10_12_5) AppleWebKit/603.2.4 (KHTML, like Gecko) Version/10.1.1 Safari/603.2.4	Safari	Mac OS X
751	70228	1627	15095	849	39500	-1	Attempted 17 Errors 9 Max 8 Score -1	Task duration 186872 OverallScore -1 Attempted 17 Errors 9 Max 8 Score -1 OddOneOut Selection Correct Level On Responded RT Score 3 1 ERROR!! 1 11371 19323 7952 0 9 6 ERROR!! 1 20669 25515 4846 -1 9 9 CORRECT 1 26794 33675 6881 -2 6 7 ERROR!! 2 34952 42228 7276 -1 8 8 CORRECT 2 43584 57013 13429 -2 2 2 CORRECT 3 58369 66269 7900 -1 2 2 CORRECT 4 67592 70733 3141 0 1 1 CORRECT 5 72090 76150 4060 1…	2		2017-11-14 23:33:56 UTC	2017-11-14 23:38:58 UTC	Mozilla/5.0 (Macintosh; Intel Mac OS X 10_12_5) AppleWebKit/603.2.4 (KHTML, like Gecko) Version/10.1.1 Safari/603.2.4	Safari	Mac OS X
751	70228	1627	15093	845	39500	6	CC trials 1 IC trials 0.4 CI trials 0.8 II trials 0.4 CC RT 3648.2 IC RT 5980.8 CI RT 3392.8 II RT 4054.8	Task duration = 95687 OverallScore 6 CC trials 1 IC trials 0.4 CI trials 0.8 II trials 0.4 CC RT 3648.2 IC RT 5980.8 CI RT 3392.8 II RT 4054.8 Problems CorrectAnswer ProbeText ProbeColour RightProbe LeftProbe ResponseChoice Feedback RT ICL Left BLUE 16711680 BLUE RED Left CORRECT 12492 CIL Left RED 16711680 BLUE RED Right INCORRECT! 4483 CIR Right RED 16711680 RED BLUE Right CORRECT 3553 ICR Righ…	2		2017-11-14 23:32:44 UTC	2017-11-14 23:34:19 UTC	Mozilla/5.0 (Macintosh; Intel Mac OS X 10_12_5) AppleWebKit/603.2.4 (KHTML, like Gecko) Version/10.1.1 Safari/603.2.4	Safari	Mac OS X
751	70228	1627	15091	847	39500	5		Task duration = 95898 5 out of 13 attempted ProbeText OuterImg InnerImg Response Feedback RT Square is smaller than circle Square Circle false CORRECT 6911 Square is contained by circle Square Circle true CORRECT 5283 Circle is not encapsulated by square Square Circle false INCORRECT! 3923 Circle does not encapsulate square Square Circle false INCORRECT! 5910 Circle is not smaller than square Squ…	2		2017-11-14 23:27:44 UTC	2017-11-14 23:29:36 UTC	Mozilla/5.0 (Macintosh; Intel Mac OS X 10_12_5) AppleWebKit/603.2.4 (KHTML, like Gecko) Version/10.1.1 Safari/603.2.4	Safari	Mac OS X
751	70228	1627	15089	848	39500	5	3.5	Task duration 91164 MaxScore 5 MeanScore 3.5 TargetString ResponseString RT Feedback 36 36 2340 CORRECT! 25231 25123 5479 INCORRECT! 1615 1615 2256 CORRECT! 51820 51820 3416 CORRECT! 8191721 8191721 4721 CORRECT! 317201311 317201311 5586 CORRECT! 3917121823 3917181223 5583 INCORRECT! 63121024 63121024 5494 CORRECT! 5141151013 5141015113 5991 INCORRECT!	2		2017-11-14 23:25:56 UTC	2017-11-14 23:28:00 UTC	Mozilla/5.0 (Macintosh; Intel Mac OS X 10_12_5) AppleWebKit/603.2.4 (KHTML, like Gecko) Version/10.1.1 Safari/603.2.4	Safari	Mac OS X
751	69528	1627	15111	853	38773	7	5.6	Task duration 142834 AvgCorrect 5.6 MaxScore 7 5.gif 2360 Response 1 of 3 Empty 4.gif 898 Response 2 of 3 Empty 16.gif 656 Token 1 of 4 3.gif 1227 Token 2 of 4 4.gif 6724 Response 1 of 2 Empty 5.gif 450 Token 3 of 4 4.gif 2666 Token 4 of 4 completed 11.gif 1483 Response 1 of 0 Empty 17.gif 809 Response 2 of 0 Empty 19.gif 657 Response 3 of 0 Empty 21.gif 498 Response 4 of 0 Empty 8.gif 481 Token …	1		2017-08-15 16:10:58 UTC	2017-08-15 16:13:26 UTC	Mozilla/5.0 (Macintosh; Intel Mac OS X 10_12_6) AppleWebKit/603.3.8 (KHTML, like Gecko) Version/10.1.2 Safari/603.3.8	Safari	Mac OS X
751	69528	1627	15109	851	38773	24	Attempted 25 Errors 9 Max 6 Score 24 CorrectScore 54	Task duration 95525 OverallScore 24 Attempted 25 Errors 9 Max 6 Score 24 CorrectScore 54 TypeOfTrial ShapeTypeRight ShapeTypeLeft CopyingWhichSide Feedback CurrentScore RT Match 5 6 Right INCORRECT! -1 2148 Mismatch 6 3 Right CORRECT 0 3143 Mismatch 6 5 Right CORRECT 1 1974 Match 3 3 Right INCORRECT! -1 2053 Mismatch 4 4 Left INCORRECT! -3 2072 Match 3 4 Left INCORRECT! -4 1923 Match 6 3 Right CO…	1		2017-08-15 16:13:46 UTC	2017-08-15 16:08:56 UTC	Mozilla/5.0 (Macintosh; Intel Mac OS X 10_12_6) AppleWebKit/603.3.8 (KHTML, like Gecko) Version/10.1.2 Safari/603.3.8	Safari	Mac OS X
751	69528	1627	15107	850	38773	2	2	Task duration 84316 MaxScore: 2 MeanScore 2 TargetString ResponseString RT Feedback 111 1 29954 Incorrect 111 111 4641 Correct 171222 12 1696 Incorrect 111 111 3318 Correct 191416 16 1736 Incorrect	1		2017-08-15 16:05:22 UTC	2017-08-15 16:06:52 UTC	Mozilla/5.0 (Macintosh; Intel Mac OS X 10_12_6) AppleWebKit/603.3.8 (KHTML, like Gecko) Version/10.1.2 Safari/603.3.8	Safari	Mac OS X
751	69528	1627	15105	855	38773	18	18	Task duration 187469 Batch: Song: OverallScore 18 DifficultyLevel Feedback MovesMade RT 1 CORRECT! 3 24710 2 CORRECT! 3 16336 3 CORRECT! 4 19386 4 CORRECT! 4 16895 5 Failed! 10 39368 4 CORRECT! 4 14045	1		2017-08-15 16:05:11 UTC	2017-08-15 16:03:33 UTC	Mozilla/5.0 (Macintosh; Intel Mac OS X 10_12_6) AppleWebKit/603.3.8 (KHTML, like Gecko) Version/10.1.2 Safari/603.3.8	Safari	Mac OS X
751	69528	1627	15103	844	38773	4	3.33333	Task duration 69691 MaxScore 4 MeanScore 3.3333333333333335 TargetString ResponseString RT Feedback 4156 3214 7238 INCORRECT! 534 534 3237 CORRECT! 3091 3019 4651 INCORRECT! 459 459 2787 CORRECT! 3062 3062 4986 CORRECT! 96280 96222 9316 INCORRECT!	1		2017-08-15 15:56:13 UTC	2017-08-15 16:02:18 UTC	Mozilla/5.0 (Macintosh; Intel Mac OS X 10_12_6) AppleWebKit/603.3.8 (KHTML, like Gecko) Version/10.1.2 Safari/603.3.8	Safari	Mac OS X
751	69528	1627	15101	846	38773	92	Attempted 22 Errors 2 Max 10 Score 92 CorrectScore 110	Task duration 95669 OverallScore 92 Attempted 22 Errors 2 Max 10 Score 92 CorrectScore 110 TrialType FeedbackText.text CurrentScore RT Matched CORRECT 1 2007 Matched CORRECT 2 1648 Mismatched CORRECT 4 1964 Mismatched CORRECT 6 1665 Mismatched CORRECT 9 1834 Matched CORRECT 12 3685 Matched CORRECT 16 2358 Matched CORRECT 20 2670 Matched CORRECT 25 2408 Matched CORRECT 30 2777 Mismatched CORRECT 3…	1		2017-08-15 15:59:18 UTC	2017-08-15 16:00:58 UTC	Mozilla/5.0 (Macintosh; Intel Mac OS X 10_12_6) AppleWebKit/603.3.8 (KHTML, like Gecko) Version/10.1.2 Safari/603.3.8	Safari	Mac OS X
751	69528	1627	15099	852	38773	69	Attempted 13 Errors 1 Max 9 Score 69 CorrectScore 75	Task duration: 95596 OverallScore 69 Attempted 13 Errors 1 Max 9 Score 69 CorrectScore 75 TrialType Angle Feedback Score RT Match 270 CORRECT 4 4942 Mismatch 180 CORRECT 8 3609 Mismatch 90 CORRECT 13 3074 Mismatch 180 CORRECT 18 2205 Match 90 CORRECT 24 6041 Match 270 INCORRECT! 18 4718 Match 90 CORRECT 24 5049 Mismatch 90 CORRECT 30 7045 Match 180 CORRECT 37 13386 Match 270 CORRECT 44 6458 Misma…	1		2017-08-15 15:50:46 UTC	2017-08-15 15:57:16 UTC	Mozilla/5.0 (Macintosh; Intel Mac OS X 10_12_6) AppleWebKit/603.3.8 (KHTML, like Gecko) Version/10.1.2 Safari/603.3.8	Safari	Mac OS X
751	69528	1627	15097	854	38773	3	3	Task duration 64074 MaxScore 3 MeanScore 3 TargetString ResponseString RT Feedback 147110 1311110 4499 INCORRECT! 131411 131411 2243 CORRECT! 415148 4151112 4768 INCORRECT! 1492 1492 2147 CORRECT! 713143 714133 3838 INCORRECT!	1		2017-08-15 15:48:05 UTC	2017-08-15 15:55:44 UTC	Mozilla/5.0 (Macintosh; Intel Mac OS X 10_12_6) AppleWebKit/603.3.8 (KHTML, like Gecko) Version/10.1.2 Safari/603.3.8	Safari	Mac OS X
751	69528	1627	15095	849	38773	10	Attempted 12 Errors 1 Max 11 Score 10	Task duration 187238 OverallScore 10 Attempted 12 Errors 1 Max 11 Score 10 OddOneOut Selection Correct Level On Responded RT Score 8 8 CORRECT 1 6415 13612 7197 0 6 6 CORRECT 2 14881 18835 3954 1 8 8 CORRECT 3 20133 24027 3894 2 1 1 CORRECT 4 25330 27699 2369 3 3 8 ERROR!! 5 28967 73549 44582 4 5 5 CORRECT 7 74968 103750 28782 3 3 3 CORRECT 8 105139 112022 6883 4 2 2 CORRECT 6 113307 119423 6116 …	1		2017-08-15 15:49:32 UTC	2017-08-15 15:52:43 UTC	Mozilla/5.0 (Macintosh; Intel Mac OS X 10_12_6) AppleWebKit/603.3.8 (KHTML, like Gecko) Version/10.1.2 Safari/603.3.8	Safari	Mac OS X
751	69528	1627	15093	845	38773	6	CC trials 1 IC trials 0 CI trials 1 II trials 0.3 CC RT 1884.5 IC RT 1818.6666666666667 CI RT 2085.1111111111113 II RT 2559.8	Task duration = 95548 OverallScore 6 CC trials 1 IC trials 0 CI trials 1 II trials 0.3 CC RT 1884.5 IC RT 1818.6666666666667 CI RT 2085.1111111111113 II RT 2559.8 Problems CorrectAnswer ProbeText ProbeColour RightProbe LeftProbe ResponseChoice Feedback RT IIL Left RED 255 RED BLUE Right INCORRECT! 1339 CIR Right BLUE 255 BLUE RED Right CORRECT 2560 CCR Right RED 16711680 RED BLUE Right CORRECT 12…	1		2017-08-15 15:40:09 UTC	2017-08-15 15:46:40 UTC	Mozilla/5.0 (Macintosh; Intel Mac OS X 10_12_6) AppleWebKit/603.3.8 (KHTML, like Gecko) Version/10.1.2 Safari/603.3.8	Safari	Mac OS X
751	69528	1627	15091	847	38773	6		Task duration = 95670 6 out of 12 attempted ProbeText OuterImg InnerImg Response Feedback RT Circle does not contain square Square Circle false INCORRECT! 13197 Square is bigger than circle Square Circle false CORRECT 5003 Circle is smaller than square Square Circle true CORRECT 3147 Circle is smaller than square Square Circle false CORRECT 2561 Square is not contained by circle Square Circle tru…	1		2017-08-15 15:41:41 UTC	2017-08-15 15:43:22 UTC	Mozilla/5.0 (Macintosh; Intel Mac OS X 10_12_6) AppleWebKit/603.3.8 (KHTML, like Gecko) Version/10.1.2 Safari/603.3.8	Safari	Mac OS X
751	69528	1627	15089	848	38773	7	4.625	Task duration 131877 MaxScore 7 MeanScore 4.625 TargetString ResponseString RT Feedback 310 310 3210 CORRECT! 3158 3158 3301 CORRECT! 9181916 9181916 4225 CORRECT! 52221198 52221198 5941 CORRECT! 6213141012 6213101412 5624 INCORRECT! 1223245 1223245 5371 CORRECT! 1824192195 1824192159 5812 INCORRECT! 238102219 238102219 3777 CORRECT! 415122311 415122311 5866 CORRECT! 1791210151419 1791210151419 6…	1		2017-08-15 15:32:30 UTC	2017-08-15 15:34:56 UTC	Mozilla/5.0 (Macintosh; Intel Mac OS X 10_12_6) AppleWebKit/603.3.8 (KHTML, like Gecko) Version/10.1.2 Safari/603.3.8	Safari	Mac OS X
751	69393	1627	15111	853	38635	7	6	Task duration 166595 AvgCorrect 6 MaxScore 7 6.gif 1886 Response 1 of 3 Empty 25.gif 2713 Response 2 of 3 Empty 22.gif 1157 Token 1 of 4 9.gif 2105 Token 2 of 4 25.gif 1540 Response 1 of 2 Empty 6.gif 1274 Token 3 of 4 25.gif 926 Token 4 of 4 completed 24.gif 1078 Response 1 of 5 Empty 22.gif 1265 Response 2 of 5 Empty 12.gif 1104 Response 3 of 5 Empty 10.gif 765 Response 4 of 5 Empty 19.gif 780 …	1		2017-07-26 17:07:43 UTC	2017-07-26 17:10:59 UTC	Mozilla/5.0 (Macintosh; Intel Mac OS X 10_11_5) AppleWebKit/537.36 (KHTML, like Gecko) Chrome/59.0.3071.115 Safari/537.36	Chrome	Mac OS X
751	69393	1627	15109	851	38635	48	Attempted 26 Errors 7 Max 6 Score 48 CorrectScore 69	Task duration 95275 OverallScore 48 Attempted 26 Errors 7 Max 6 Score 48 CorrectScore 69 TypeOfTrial ShapeTypeRight ShapeTypeLeft CopyingWhichSide Feedback CurrentScore RT Match 6 5 Right CORRECT 1 2059 Mismatch 3 4 Right INCORRECT! 0 1038 Mismatch 3 5 Right INCORRECT! -1 2805 Match 4 5 Right CORRECT 0 2483 Match 4 5 Right CORRECT 1 1351 Match 4 5 Left CORRECT 3 1724 Mismatch 5 3 Right INCORRECT!…	1		2017-07-26 17:05:40 UTC	2017-07-26 17:02:08 UTC	Mozilla/5.0 (Macintosh; Intel Mac OS X 10_11_5) AppleWebKit/537.36 (KHTML, like Gecko) Chrome/59.0.3071.115 Safari/537.36	Chrome	Mac OS X
751	69393	1627	15107	850	38635	3	2.5	Task duration 90090 MaxScore: 3 MeanScore 2.5 TargetString ResponseString RT Feedback 116 116 3450 Correct 102011 102011 4408 Correct 22141113 11 2036 Incorrect 51124 24 2003 Incorrect 197 197 2638 Correct 1329 1329 4949 Correct 1517916 159 4348 Incorrect	1		2017-07-26 16:58:02 UTC	2017-07-26 16:59:39 UTC	Mozilla/5.0 (Macintosh; Intel Mac OS X 10_11_5) AppleWebKit/537.36 (KHTML, like Gecko) Chrome/59.0.3071.115 Safari/537.36	Chrome	Mac OS X
751	69393	1627	15105	855	38635	7	7	Task duration 187023 Batch: Song: OverallScore 7 DifficultyLevel Feedback MovesMade RT 1 Failed! 6 36335 1 CORRECT! 5 39227 2 CORRECT! 3 6971 3 Failed! 8 77060 2 CORRECT! 3 5995	1		2017-07-26 16:57:58 UTC	2017-07-26 16:57:20 UTC	Mozilla/5.0 (Macintosh; Intel Mac OS X 10_11_5) AppleWebKit/537.36 (KHTML, like Gecko) Chrome/59.0.3071.115 Safari/537.36	Chrome	Mac OS X
751	69393	1627	15103	844	38635	6	5.2	Task duration 124980 MaxScore 6 MeanScore 5.2 TargetString ResponseString RT Feedback 4102 4102 12988 CORRECT! 76932 76932 4854 CORRECT! 631742 631742 5185 CORRECT! 3957801 3957341 5905 INCORRECT! 073145 073140 6652 INCORRECT! 20856 20856 4736 CORRECT! 028754 028754 4323 CORRECT! 0156483 2345678 19039 INCORRECT!	1		2017-07-26 16:50:32 UTC	2017-07-26 16:52:50 UTC	Mozilla/5.0 (Macintosh; Intel Mac OS X 10_11_5) AppleWebKit/537.36 (KHTML, like Gecko) Chrome/59.0.3071.115 Safari/537.36	Chrome	Mac OS X
751	69393	1627	15101	846	38635	143	Attempted 26 Errors 2 Max 12 Score 143 CorrectScore 155	Task duration 94960 OverallScore 143 Attempted 26 Errors 2 Max 12 Score 143 CorrectScore 155 TrialType FeedbackText.text CurrentScore RT Mismatched INCORRECT! -1 2027 Mismatched CORRECT 0 2218 Mismatched CORRECT 1 1354 Matched CORRECT 3 1538 Matched CORRECT 5 1168 Matched CORRECT 8 1165 Mismatched CORRECT 11 2448 Matched CORRECT 15 2141 Mismatched CORRECT 19 2545 Matched CORRECT 24 2672 Mismatche…	1		2017-07-26 16:52:16 UTC	2017-07-26 16:54:52 UTC	Mozilla/5.0 (Macintosh; Intel Mac OS X 10_11_5) AppleWebKit/537.36 (KHTML, like Gecko) Chrome/59.0.3071.115 Safari/537.36	Chrome	Mac OS X
751	69393	1627	15099	852	38635	64	Attempted 14 Errors 2 Max 9 Score 64 CorrectScore 76	Task duration: 95193 OverallScore 64 Attempted 14 Errors 2 Max 9 Score 64 CorrectScore 76 TrialType Angle Feedback Score RT Match 270 CORRECT 4 3747 Mismatch 90 CORRECT 8 3769 Match 90 INCORRECT! 3 6280 Match 90 CORRECT 8 3736 Match 90 CORRECT 13 3284 Match 90 CORRECT 19 3533 Match 270 CORRECT 25 6018 Mismatch 270 CORRECT 32 2192 Match 270 INCORRECT! 25 3075 Mismatch 270 CORRECT 32 5841 Match 90 …	1		2017-07-26 16:50:42 UTC	2017-07-26 16:47:54 UTC	Mozilla/5.0 (Macintosh; Intel Mac OS X 10_11_5) AppleWebKit/537.36 (KHTML, like Gecko) Chrome/59.0.3071.115 Safari/537.36	Chrome	Mac OS X
751	69393	1627	15097	854	38635	6	5	Task duration 118107 MaxScore 6 MeanScore 5 TargetString ResponseString RT Feedback 121155 121155 4339 CORRECT! 514809 514809 4114 CORRECT! 4031351 0431351 6505 INCORRECT! 1310891 1310891 5626 CORRECT! 121141307 121141307 6126 CORRECT! 1241436011 124314607 7146 INCORRECT! 413871411 413791511 6415 INCORRECT!	1		2017-07-26 16:47:28 UTC	2017-07-26 16:48:55 UTC	Mozilla/5.0 (Macintosh; Intel Mac OS X 10_11_5) AppleWebKit/537.36 (KHTML, like Gecko) Chrome/59.0.3071.115 Safari/537.36	Chrome	Mac OS X
751	69393	1627	15095	849	38635	8	Attempted 20 Errors 6 Max 14 Score 8	Task duration 186677 OverallScore 8 Attempted 20 Errors 6 Max 14 Score 8 OddOneOut Selection Correct Level On Responded RT Score 5 5 CORRECT 1 13748 17489 3741 0 6 6 CORRECT 2 18822 22486 3664 1 8 8 CORRECT 3 23785 27205 3420 2 5 5 CORRECT 4 28485 30797 2312 3 8 8 CORRECT 7 32127 34884 2757 4 4 4 CORRECT 6 36283 41305 5022 5 9 9 CORRECT 5 42573 53636 11063 6 3 3 CORRECT 8 54905 59606 4701 7 8 8 C…	1		2017-07-26 16:38:45 UTC	2017-07-26 16:42:03 UTC	Mozilla/5.0 (Macintosh; Intel Mac OS X 10_11_5) AppleWebKit/537.36 (KHTML, like Gecko) Chrome/59.0.3071.115 Safari/537.36	Chrome	Mac OS X
751	69393	1627	15093	845	38635	35	CC trials 1 IC trials 1 CI trials 1 II trials 0.8888888888888888 CC RT 2199.7 IC RT 1986.7777777777778 CI RT 2406.777777777778 II RT 1967.5555555555557	Task duration = 95893 OverallScore 35 CC trials 1 IC trials 1 CI trials 1 II trials 0.8888888888888888 CC RT 2199.7 IC RT 1986.7777777777778 CI RT 2406.777777777778 II RT 1967.5555555555557 Problems CorrectAnswer ProbeText ProbeColour RightProbe LeftProbe ResponseChoice Feedback RT CIR Right RED 16711680 RED BLUE Right CORRECT 2407 ICL Left BLUE 16711680 BLUE RED Left CORRECT 2373 IIL Left RED 25…	1		2017-07-26 16:40:41 UTC	2017-07-26 16:43:09 UTC	Mozilla/5.0 (Macintosh; Intel Mac OS X 10_11_5) AppleWebKit/537.36 (KHTML, like Gecko) Chrome/59.0.3071.115 Safari/537.36	Chrome	Mac OS X
751	69393	1627	15091	847	38635	10		Task duration = 95231 10 out of 20 attempted ProbeText OuterImg InnerImg Response Feedback RT Square encapsulates circle Square Circle true CORRECT 2030 Square is not smaller than circle Square Circle false INCORRECT! 3038 Circle is not bigger than square Square Circle false CORRECT 5337 Circle encapsulates square Square Circle true CORRECT 2318 Square does not encapsulate circle Square Circle tr…	1		2017-07-26 16:38:33 UTC	2017-07-26 16:39:06 UTC	Mozilla/5.0 (Macintosh; Intel Mac OS X 10_11_5) AppleWebKit/537.36 (KHTML, like Gecko) Chrome/59.0.3071.115 Safari/537.36	Chrome	Mac OS X
751	69393	1627	15089	848	38635	10	6.36364	Task duration 202567 MaxScore 10 MeanScore 6.363636363636363 TargetString ResponseString RT Feedback 153 153 2030 CORRECT! 242314 242314 2614 CORRECT! 2024512 2024512 3514 CORRECT! 29182215 29182215 4167 CORRECT! 221215162325 221215162325 5428 CORRECT! 122111311234 122111311234 5757 CORRECT! 1619712201424 1619712142420 8641 INCORRECT! 1220241932217 1220241932217 5272 CORRECT! 15161232024921 15161…	1		2017-07-26 16:28:11 UTC	2017-07-26 16:32:29 UTC	Mozilla/5.0 (Macintosh; Intel Mac OS X 10_11_5) AppleWebKit/537.36 (KHTML, like Gecko) Chrome/59.0.3071.115 Safari/537.36	Chrome	Mac OS X
751	69309	1627	15111	853	38634	2	2	Task duration 52253 AvgCorrect 2 MaxScore 2 8.gif 9376 Response 1 of 2 Empty 19.gif 1948 Token 1 of 4 25.gif 2033 Response 1 of 3 Empty 7.gif 905 Response 2 of 3 Empty 19.gif 2027 Response 3 of 3 Found ERROR! 5.gif 4028 Token 1 of 3 16.gif 3832 Response 1 of 2 Empty 17.gif 1392 Token 2 of 3 5.gif 1279 Response 1 of 1 Found ERROR! 25.gif 1869 Token 1 of 2 22.gif 2392 Token 2 of 2 completed 12.gif …	1		2017-07-26 16:06:41 UTC	2017-07-26 16:07:37 UTC	Mozilla/5.0 (Macintosh; Intel Mac OS X 10_12_5) AppleWebKit/603.2.4 (KHTML, like Gecko) Version/10.1.1 Safari/603.2.4	Safari	Mac OS X
751	69309	1627	15109	851	38634	3	Attempted 17 Errors 7 Max 3 Score 3 CorrectScore 24	Task duration 95342 OverallScore 3 Attempted 17 Errors 7 Max 3 Score 3 CorrectScore 24 TypeOfTrial ShapeTypeRight ShapeTypeLeft CopyingWhichSide Feedback CurrentScore RT Mismatch 5 6 Right INCORRECT! -1 6520 Match 3 5 Left CORRECT 0 5608 Mismatch 5 6 Right CORRECT 1 7044 Match 3 4 Left CORRECT 3 3744 Mismatch 5 4 Left CORRECT 5 6616 Mismatch 3 3 Right CORRECT 8 3591 Mismatch 5 5 Left CORRECT 11 5…	1		2017-07-26 16:04:44 UTC	2017-07-26 16:06:24 UTC	Mozilla/5.0 (Macintosh; Intel Mac OS X 10_12_5) AppleWebKit/603.2.4 (KHTML, like Gecko) Version/10.1.1 Safari/603.2.4	Safari	Mac OS X
751	69309	1627	15107	850	38634	3	2.33333	Task duration 97145 MaxScore: 3 MeanScore 2.3333333333333335 TargetString ResponseString RT Feedback 74 74 16861 Correct 6248 6248 9496 Correct 319162 19 3481 Incorrect 11107 10 3185 Incorrect 112 112 5702 Correct 24219 9 2978 Incorrect	1		2017-07-26 16:06:42 UTC	2017-07-26 16:04:33 UTC	Mozilla/5.0 (Macintosh; Intel Mac OS X 10_12_5) AppleWebKit/603.2.4 (KHTML, like Gecko) Version/10.1.1 Safari/603.2.4	Safari	Mac OS X
751	69309	1627	15105	855	38634	3	3	Task duration 187276 Batch: Song: OverallScore 3 DifficultyLevel Feedback MovesMade RT 1 Failed! 6 61879 1 Failed! 6 72558 1 CORRECT! 3 29091	1		2017-07-26 15:59:26 UTC	2017-07-26 16:06:29 UTC	Mozilla/5.0 (Macintosh; Intel Mac OS X 10_12_5) AppleWebKit/603.2.4 (KHTML, like Gecko) Version/10.1.1 Safari/603.2.4	Safari	Mac OS X
751	69309	1627	15103	844	38634	5	4	Task duration 184889 MaxScore 5 MeanScore 4 TargetString ResponseString RT Feedback Focus Lost At 59169 0235 7766 83376 INCORRECT! 685 685 6406 CORRECT! 0681 0681 5183 CORRECT! 35028 35064 17273 INCORRECT! 2057 2057 6787 CORRECT! 43056 43056 9069 CORRECT! 813204 810327 9904 INCORRECT!	1		2017-07-26 15:55:49 UTC	2017-07-26 16:02:49 UTC	Mozilla/5.0 (Macintosh; Intel Mac OS X 10_12_5) AppleWebKit/603.2.4 (KHTML, like Gecko) Version/10.1.1 Safari/603.2.4	Safari	Mac OS X
751	69309	1627	15101	846	38634	48	Attempted 14 Errors 1 Max 7 Score 48 CorrectScore 49	Task duration 95409 OverallScore 48 Attempted 14 Errors 1 Max 7 Score 48 CorrectScore 49 TrialType FeedbackText.text CurrentScore RT Mismatched INCORRECT! -1 6734 Matched CORRECT 0 2815 Mismatched CORRECT 1 2224 Matched CORRECT 3 3915 Mismatched CORRECT 5 2867 Mismatched CORRECT 8 3717 Matched CORRECT 11 6796 Mismatched CORRECT 15 4940 Matched CORRECT 19 5651 Mismatched CORRECT 24 5047 Matched CO…	1		2017-07-26 15:53:55 UTC	2017-07-26 15:55:35 UTC	Mozilla/5.0 (Macintosh; Intel Mac OS X 10_12_5) AppleWebKit/603.2.4 (KHTML, like Gecko) Version/10.1.1 Safari/603.2.4	Safari	Mac OS X
751	69309	1627	15099	852	38634	16	Attempted 8 Errors 2 Max 6 Score 16 CorrectScore 30	Task duration: 95846 OverallScore 16 Attempted 8 Errors 2 Max 6 Score 16 CorrectScore 30 TrialType Angle Feedback Score RT Match 180 CORRECT 4 10357 Match 180 CORRECT 8 10861 Match 270 CORRECT 13 9015 Mismatch 270 CORRECT 18 9037 Mismatch 270 CORRECT 24 7797 Mismatch 180 CORRECT 30 8036 Mismatch 90 INCORRECT! 23 12326 Match 270 INCORRECT! 16 9079	1		2017-07-26 15:56:45 UTC	2017-07-26 15:53:39 UTC	Mozilla/5.0 (Macintosh; Intel Mac OS X 10_12_5) AppleWebKit/603.2.4 (KHTML, like Gecko) Version/10.1.1 Safari/603.2.4	Safari	Mac OS X
751	69309	1627	15097	854	38634	3	3	Task duration 73340 MaxScore 3 MeanScore 3 TargetString ResponseString RT Feedback 70915 70149 5919 INCORRECT! 15137 15137 4954 CORRECT! 11067 110137 6719 INCORRECT! 8111 8111 3867 CORRECT! 140157 140117 5354 INCORRECT!	1		2017-07-26 15:54:40 UTC	2017-07-26 15:51:11 UTC	Mozilla/5.0 (Macintosh; Intel Mac OS X 10_12_5) AppleWebKit/603.2.4 (KHTML, like Gecko) Version/10.1.1 Safari/603.2.4	Safari	Mac OS X
751	69309	1627	15095	849	38634	9	Attempted 13 Errors 2 Max 11 Score 9	Task duration 187224 OverallScore 9 Attempted 13 Errors 2 Max 11 Score 9 OddOneOut Selection Correct Level On Responded RT Score 4 4 CORRECT 1 6758 16936 10178 0 3 3 CORRECT 2 18271 28408 10137 1 8 8 CORRECT 3 29719 45281 15562 2 9 9 CORRECT 4 46773 59297 12524 3 9 9 CORRECT 7 60771 70490 9719 4 8 8 CORRECT 5 71773 81634 9861 5 5 5 CORRECT 6 83036 91795 8759 6 3 3 CORRECT 8 93105 101835 8730 7 9 …	1		2017-07-26 15:51:30 UTC	2017-07-26 15:49:30 UTC	Mozilla/5.0 (Macintosh; Intel Mac OS X 10_12_5) AppleWebKit/603.2.4 (KHTML, like Gecko) Version/10.1.1 Safari/603.2.4	Safari	Mac OS X
751	69309	1627	15093	845	38634	0	CC trials 0.9 IC trials 0.4 CI trials 0.4 II trials 0.3 CC RT 1398.9 IC RT 2480.1 CI RT 2303.5 II RT 1741.9	Task duration = 95592 OverallScore 0 CC trials 0.9 IC trials 0.4 CI trials 0.4 II trials 0.3 CC RT 1398.9 IC RT 2480.1 CI RT 2303.5 II RT 1741.9 Problems CorrectAnswer ProbeText ProbeColour RightProbe LeftProbe ResponseChoice Feedback RT ICR Right BLUE 16711680 RED BLUE Left INCORRECT! 5117 CIR Right BLUE 255 BLUE RED Left INCORRECT! 5174 IIL Left RED 255 RED BLUE Right INCORRECT! 3907 ICL Left R…	1		2017-07-26 15:43:49 UTC	2017-07-26 15:50:26 UTC	Mozilla/5.0 (Macintosh; Intel Mac OS X 10_12_5) AppleWebKit/603.2.4 (KHTML, like Gecko) Version/10.1.1 Safari/603.2.4	Safari	Mac OS X
751	69309	1627	15091	847	38634	5		Task duration = 95435 5 out of 9 attempted ProbeText OuterImg InnerImg Response Feedback RT Circle is not contained by square Square Circle false INCORRECT! 9497 Square does not contain circle Square Circle false CORRECT 10144 Circle does not contain square Square Circle true CORRECT 10756 Square is contained by circle Square Circle true CORRECT 5953 Circle encapsulates square Square Circle false…	1		2017-07-26 15:46:22 UTC	2017-07-26 15:43:14 UTC	Mozilla/5.0 (Macintosh; Intel Mac OS X 10_12_5) AppleWebKit/603.2.4 (KHTML, like Gecko) Version/10.1.1 Safari/603.2.4	Safari	Mac OS X
751	69309	1627	15089	848	38634	6	4.28571	Task duration 142488 MaxScore 6 MeanScore 4.285714285714286 TargetString ResponseString RT Feedback 122 122 6104 CORRECT! 11320 11320 5009 CORRECT! 199411 199411 8028 CORRECT! 102220525 202251025 10520 INCORRECT! 1615519 1615519 6720 CORRECT! 241512411 241512411 5692 CORRECT! 2321221213 2321221213 6132 CORRECT! 14231119131618 14112319131618 10166 INCORRECT! 142221918 142221918 7145 CORRECT! 42325…	1		2017-07-26 15:43:45 UTC	2017-07-26 15:41:02 UTC	Mozilla/5.0 (Macintosh; Intel Mac OS X 10_12_5) AppleWebKit/603.2.4 (KHTML, like Gecko) Version/10.1.1 Safari/603.2.4	Safari	Mac OS X
751	69366	1627	15111	853	38608	6	5	Task duration 58194 AvgCorrect 5 MaxScore 6 6.gif 2891 Response 1 of 3 Empty 11.gif 490 Response 2 of 3 Empty 24.gif 467 Token 1 of 4 17.gif 392 Token 2 of 4 11.gif 329 Response 1 of 2 Empty 6.gif 498 Token 3 of 4 11.gif 322 Token 4 of 4 completed 12.gif 1316 Response 1 of 3 Empty 17.gif 330 Response 2 of 3 Empty 16.gif 686 Token 1 of 5 22.gif 341 Response 1 of 2 Empty 20.gif 85 Token 2 of 5 17.g…	1		2017-07-24 17:34:31 UTC	2017-07-24 17:35:32 UTC	Mozilla/5.0 (Macintosh; Intel Mac OS X 10_11_5) AppleWebKit/537.36 (KHTML, like Gecko) Chrome/59.0.3071.115 Safari/537.36	Chrome	Mac OS X
751	69366	1627	15109	851	38608	15	Attempted 33 Errors 13 Max 6 Score 15 CorrectScore 73	Task duration 95507 OverallScore 15 Attempted 33 Errors 13 Max 6 Score 15 CorrectScore 73 TypeOfTrial ShapeTypeRight ShapeTypeLeft CopyingWhichSide Feedback CurrentScore RT Mismatch 6 6 Right INCORRECT! -1 2730 Match 4 4 Right CORRECT 0 2439 Match 6 5 Left CORRECT 1 2217 Mismatch 4 5 Right CORRECT 3 2020 Match 3 5 Left CORRECT 5 1792 Match 4 3 Left INCORRECT! 2 1645 Mismatch 3 6 Right CORRECT 5 3…	1		2017-07-24 17:33:36 UTC	2017-07-24 17:34:23 UTC	Mozilla/5.0 (Macintosh; Intel Mac OS X 10_11_5) AppleWebKit/537.36 (KHTML, like Gecko) Chrome/59.0.3071.115 Safari/537.36	Chrome	Mac OS X
751	69366	1627	15107	850	38608	3	2.75	Task duration 97916 MaxScore: 3 MeanScore 2.75 TargetString ResponseString RT Feedback 58 58 3878 Correct 1136 1136 4521 Correct 181967 187 3489 Incorrect 2189 2189 3319 Correct 2021114 2014 3233 Incorrect 7322 7322 4751 Correct 932320 9320 4911 Incorrect	1		2017-07-24 17:20:00 UTC	2017-07-24 17:33:30 UTC	Mozilla/5.0 (Macintosh; Intel Mac OS X 10_11_5) AppleWebKit/537.36 (KHTML, like Gecko) Chrome/59.0.3071.115 Safari/537.36	Chrome	Mac OS X
751	69366	1627	15105	855	38608	10	10	Task duration 187067 Batch: Song: OverallScore 10 DifficultyLevel Feedback MovesMade RT 1 CORRECT! 6 18142 2 CORRECT! 3 15576 3 Failed! 8 45599 2 CORRECT! 3 8368 3 CORRECT! 4 8745 4 CORRECT! 8 47155	1		2017-07-24 17:16:25 UTC	2017-07-24 17:24:17 UTC	Mozilla/5.0 (Macintosh; Intel Mac OS X 10_11_5) AppleWebKit/537.36 (KHTML, like Gecko) Chrome/59.0.3071.115 Safari/537.36	Chrome	Mac OS X
751	69366	1627	15103	844	38608	4	3.5	Task duration 44047 MaxScore 4 MeanScore 3.5 TargetString ResponseString RT Feedback 3240 4044 2370 INCORRECT! 597 597 1117 CORRECT! 8743 8743 1318 CORRECT! 93145 49315 3490 INCORRECT! 0152 1552 3237 INCORRECT!	1		2017-07-24 17:19:18 UTC	2017-07-24 17:16:20 UTC	Mozilla/5.0 (Macintosh; Intel Mac OS X 10_11_5) AppleWebKit/537.36 (KHTML, like Gecko) Chrome/59.0.3071.115 Safari/537.36	Chrome	Mac OS X
751	69366	1627	15101	846	38608	72	Attempted 18 Errors 1 Max 9 Score 72 CorrectScore 81	Task duration 95251 OverallScore 72 Attempted 18 Errors 1 Max 9 Score 72 CorrectScore 81 TrialType FeedbackText.text CurrentScore RT Mismatched CORRECT 1 4084 Mismatched CORRECT 2 2478 Matched CORRECT 4 1497 Matched CORRECT 6 1663 Mismatched CORRECT 9 2641 Matched CORRECT 12 3462 Mismatched CORRECT 16 3591 Matched CORRECT 20 2704 Matched CORRECT 25 3482 Matched CORRECT 30 3068 Mismatched CORRECT …	1		2017-07-24 17:09:48 UTC	2017-07-24 17:11:34 UTC	Mozilla/5.0 (Macintosh; Intel Mac OS X 10_11_5) AppleWebKit/537.36 (KHTML, like Gecko) Chrome/59.0.3071.115 Safari/537.36	Chrome	Mac OS X
751	69366	1627	15099	852	38608	-10	Attempted 32 Errors 16 Max 5 Score -10 CorrectScore 54	Task duration: 95428 OverallScore -10 Attempted 32 Errors 16 Max 5 Score -10 CorrectScore 54 TrialType Angle Feedback Score RT Match 90 INCORRECT! -4 5276 Match 90 INCORRECT! -8 5194 Match 90 CORRECT -5 2137 Mismatch 90 INCORRECT! -8 2050 Mismatch 180 INCORRECT! -11 2547 Mismatch 270 CORRECT -9 1551 Mismatch 180 CORRECT -7 975 Mismatch 180 CORRECT -4 841 Match 270 CORRECT -1 1094 Match 90 CORRECT…	1		2017-07-24 17:08:57 UTC	2017-07-24 17:10:29 UTC	Mozilla/5.0 (Macintosh; Intel Mac OS X 10_11_5) AppleWebKit/537.36 (KHTML, like Gecko) Chrome/59.0.3071.115 Safari/537.36	Chrome	Mac OS X
751	69366	1627	15097	854	38608	5	4.5	Task duration 124019 MaxScore 5 MeanScore 4.5 TargetString ResponseString RT Feedback 10296 10296 3566 CORRECT! 15813512 15813512 5310 CORRECT! 1411139157 1411131575 12617 INCORRECT! 2145412 214458 6727 INCORRECT! 01021 01021 6053 CORRECT! 6412514 6412514 7992 CORRECT! 71012364 10712325 7832 INCORRECT!	1		2017-07-24 17:05:34 UTC	2017-07-24 17:08:18 UTC	Mozilla/5.0 (Macintosh; Intel Mac OS X 10_11_5) AppleWebKit/537.36 (KHTML, like Gecko) Chrome/59.0.3071.115 Safari/537.36	Chrome	Mac OS X
751	69366	1627	15095	849	38608	-9	Attempted 23 Errors 16 Max 7 Score -9	Task duration 187202 OverallScore -9 Attempted 23 Errors 16 Max 7 Score -9 OddOneOut Selection Correct Level On Responded RT Score 6 4 ERROR!! 1 13362 27662 14300 0 2 5 ERROR!! 1 28937 35192 6255 -1 4 2 ERROR!! 1 36608 40806 4198 -2 2 2 CORRECT 1 42105 47208 5103 -3 8 9 ERROR!! 2 48515 51820 3305 -2 5 5 CORRECT 2 53102 62186 9084 -3 1 1 CORRECT 3 63516 74247 10731 -2 3 3 CORRECT 4 75554 87095 115…	1		2017-07-24 17:02:13 UTC	2017-07-24 17:05:30 UTC	Mozilla/5.0 (Macintosh; Intel Mac OS X 10_11_5) AppleWebKit/537.36 (KHTML, like Gecko) Chrome/59.0.3071.115 Safari/537.36	Chrome	Mac OS X
751	69366	1627	15093	845	38608	-1	CC trials 0.9 IC trials 0.2727272727272727 CI trials 0.6666666666666666 II trials 0.1 CC RT 1843.8 IC RT 2133.3636363636365 CI RT 1881.0833333333333 II RT 1390.7	Task duration = 95639 OverallScore -1 CC trials 0.9 IC trials 0.2727272727272727 CI trials 0.6666666666666666 II trials 0.1 CC RT 1843.8 IC RT 2133.3636363636365 CI RT 1881.0833333333333 II RT 1390.7 Problems CorrectAnswer ProbeText ProbeColour RightProbe LeftProbe ResponseChoice Feedback RT CIR Right BLUE 255 BLUE RED Left INCORRECT! 2767 CIL Left RED 16711680 BLUE RED Left CORRECT 3144 ICL Left…	1		2017-07-24 16:50:56 UTC	2017-07-24 16:47:57 UTC	Mozilla/5.0 (Macintosh; Intel Mac OS X 10_11_5) AppleWebKit/537.36 (KHTML, like Gecko) Chrome/59.0.3071.115 Safari/537.36	Chrome	Mac OS X
751	69366	1627	15091	847	38608	3		Task duration = 95397 3 out of 15 attempted ProbeText OuterImg InnerImg Response Feedback RT Square contains circle Square Circle true CORRECT 9601 Square is bigger than circle Square Circle false INCORRECT! 6501 Circle is not contained by square Square Circle true INCORRECT! 10849 Square encapsulates circle Square Circle false CORRECT 1779 Circle is not smaller than square Square Circle false CO…	1		2017-07-24 16:43:10 UTC	2017-07-24 16:48:47 UTC	Mozilla/5.0 (Macintosh; Intel Mac OS X 10_11_5) AppleWebKit/537.36 (KHTML, like Gecko) Chrome/59.0.3071.115 Safari/537.36	Chrome	Mac OS X
751	69366	1627	15089	848	38608	5	3.6	Task duration 84563 MaxScore 5 MeanScore 3.6 TargetString ResponseString RT Feedback 1422 1422 2415 CORRECT! 22514 22514 3048 CORRECT! 12839 12839 6300 CORRECT! 122410216 122421610 6827 INCORRECT! 9201025 9201025 4227 CORRECT! 191713122 191713122 3533 CORRECT! 16191452418 16191451824 5371 INCORRECT! 2321417 2317214 5458 INCORRECT!	1		2017-07-24 16:45:13 UTC	2017-07-24 16:48:00 UTC	Mozilla/5.0 (Macintosh; Intel Mac OS X 10_11_5) AppleWebKit/537.36 (KHTML, like Gecko) Chrome/59.0.3071.115 Safari/537.36	Chrome	Mac OS X
751	69362	1627	15111	853	38605	4	3.66667	Task duration 143927 AvgCorrect 3.6666666666666665 MaxScore 4 21.gif 11503 Response 1 of 3 Empty 2.gif 3206 Response 2 of 3 Empty 8.gif 2060 Token 1 of 4 21.gif 5355 Response 1 of 2 Empty 9.gif 1118 Token 2 of 4 2.gif 3752 Token 3 of 4 21.gif 3293 Token 4 of 4 completed 24.gif 5449 Token 1 of 5 18.gif 3386 Response 1 of 4 Empty 9.gif 980 Response 2 of 4 Empty 15.gif 2134 Response 3 of 4 Empty 2.g…	1		2017-07-24 16:45:26 UTC	2017-07-24 16:44:14 UTC	Mozilla/5.0 (Macintosh; Intel Mac OS X 10_12_5) AppleWebKit/603.2.4 (KHTML, like Gecko) Version/10.1.1 Safari/603.2.4	Safari	Mac OS X
751	69362	1627	15109	851	38605	13	Attempted 16 Errors 5 Max 4 Score 13 CorrectScore 24	Task duration 95554 OverallScore 13 Attempted 16 Errors 5 Max 4 Score 13 CorrectScore 24 TypeOfTrial ShapeTypeRight ShapeTypeLeft CopyingWhichSide Feedback CurrentScore RT Match 4 3 Left INCORRECT! -1 3884 Match 6 6 Right CORRECT 0 3354 Mismatch 4 5 Right INCORRECT! -1 3569 Match 6 4 Right CORRECT 0 2990 Match 6 3 Right CORRECT 1 3539 Match 5 6 Left CORRECT 3 3363 Match 4 5 Right CORRECT 5 3498 M…	1		2017-07-24 16:44:22 UTC	2017-07-24 16:45:40 UTC	Mozilla/5.0 (Macintosh; Intel Mac OS X 10_12_5) AppleWebKit/603.2.4 (KHTML, like Gecko) Version/10.1.1 Safari/603.2.4	Safari	Mac OS X
751	69362	1627	15107	850	38605	3	2.5	Task duration 133388 MaxScore: 3 MeanScore 2.5 TargetString ResponseString RT Feedback 1318 1318 8969 Correct 12110 12110 16516 Correct 47913 4713 12481 Incorrect 1974 194 6826 Incorrect 2013 2013 7082 Correct 1174 1174 10519 Correct 162113 13 4922 Incorrect	1		2017-07-24 16:40:58 UTC	2017-07-24 16:38:14 UTC	Mozilla/5.0 (Macintosh; Intel Mac OS X 10_12_5) AppleWebKit/603.2.4 (KHTML, like Gecko) Version/10.1.1 Safari/603.2.4	Safari	Mac OS X
751	69362	1627	15105	855	38605	6	6	Task duration 187023 Batch: Song: OverallScore 6 DifficultyLevel Feedback MovesMade RT 1 CORRECT! 3 25534 2 CORRECT! 3 56026	1		2017-07-24 16:35:42 UTC	2017-07-24 16:39:02 UTC	Mozilla/5.0 (Macintosh; Intel Mac OS X 10_12_5) AppleWebKit/603.2.4 (KHTML, like Gecko) Version/10.1.1 Safari/603.2.4	Safari	Mac OS X
751	69362	1627	15103	844	38605	5	4.33333	Task duration 78361 MaxScore 5 MeanScore 4.333333333333333 TargetString ResponseString RT Feedback 4370 4370 3655 CORRECT! 09285 09852 7370 INCORRECT! 3841 3841 4121 CORRECT! 13425 13425 3655 CORRECT! 463812 436218 9456 INCORRECT! 54832 12345 7785 INCORRECT!	1		2017-07-24 16:29:29 UTC	2017-07-24 16:34:37 UTC	Mozilla/5.0 (Macintosh; Intel Mac OS X 10_12_5) AppleWebKit/603.2.4 (KHTML, like Gecko) Version/10.1.1 Safari/603.2.4	Safari	Mac OS X
751	69362	1627	15101	846	38605	37	Attempted 13 Errors 1 Max 6 Score 37 CorrectScore 42	Task duration 95634 OverallScore 37 Attempted 13 Errors 1 Max 6 Score 37 CorrectScore 42 TrialType FeedbackText.text CurrentScore RT Matched CORRECT 1 4452 Mismatched CORRECT 2 2450 Matched CORRECT 4 2868 Mismatched CORRECT 6 2405 Matched CORRECT 9 3613 Matched CORRECT 12 2027 Mismatched CORRECT 16 5375 Matched CORRECT 20 4959 Mismatched INCORRECT! 15 4164 Matched CORRECT 20 9165 Mismatched CORRE…	1		2017-07-24 16:31:33 UTC	2017-07-24 16:33:35 UTC	Mozilla/5.0 (Macintosh; Intel Mac OS X 10_12_5) AppleWebKit/603.2.4 (KHTML, like Gecko) Version/10.1.1 Safari/603.2.4	Safari	Mac OS X
751	69362	1627	15099	852	38605	8	Attempted 6 Errors 2 Max 5 Score 8 CorrectScore 18	Task duration: 95362 OverallScore 8 Attempted 6 Errors 2 Max 5 Score 8 CorrectScore 18 TrialType Angle Feedback Score RT Match 270 CORRECT 4 7547 Mismatch 180 CORRECT 8 5452 Match 180 CORRECT 13 3892 Mismatch 270 INCORRECT! 8 3843 Match 270 CORRECT 13 14701 Mismatch 180 INCORRECT! 8 38424	1		2017-07-24 16:27:44 UTC	2017-07-24 16:30:41 UTC	Mozilla/5.0 (Macintosh; Intel Mac OS X 10_12_5) AppleWebKit/603.2.4 (KHTML, like Gecko) Version/10.1.1 Safari/603.2.4	Safari	Mac OS X
751	69362	1627	15097	854	38605	5	4.66667	Task duration 119507 MaxScore 5 MeanScore 4.666666666666667 TargetString ResponseString RT Feedback 3768 3768 6455 CORRECT! 114236 114236 9821 CORRECT! 131417113 131412711 8327 INCORRECT! 9515132 9515132 7715 CORRECT! 1107382 52711104 12322 INCORRECT! 21211134 2811146 10143 INCORRECT!	1		2017-07-24 16:25:45 UTC	2017-07-24 16:26:57 UTC	Mozilla/5.0 (Macintosh; Intel Mac OS X 10_12_5) AppleWebKit/603.2.4 (KHTML, like Gecko) Version/10.1.1 Safari/603.2.4	Safari	Mac OS X
751	69362	1627	15095	849	38605	7	Attempted 11 Errors 2 Max 9 Score 7	Task duration 187171 OverallScore 7 Attempted 11 Errors 2 Max 9 Score 7 OddOneOut Selection Correct Level On Responded RT Score 7 7 CORRECT 1 7610 15036 7426 0 6 6 CORRECT 2 16330 24923 8593 1 9 9 CORRECT 3 26281 36507 10226 2 5 5 CORRECT 4 37913 45492 7579 3 5 5 CORRECT 7 46831 60652 13821 4 4 4 CORRECT 5 61947 67476 5529 5 3 3 CORRECT 6 68756 83389 14633 6 3 3 CORRECT 8 84697 95229 10532 7 8 8 …	1		2017-07-24 16:22:06 UTC	2017-07-24 16:25:18 UTC	Mozilla/5.0 (Macintosh; Intel Mac OS X 10_12_5) AppleWebKit/603.2.4 (KHTML, like Gecko) Version/10.1.1 Safari/603.2.4	Safari	Mac OS X
751	69362	1627	15093	845	38605	1	CC trials 1 IC trials 1 CI trials 0 II trials 0 CC RT 3334.1666666666665 IC RT 2873.625 CI RT 2883.1428571428573 II RT 2982.1666666666665	Task duration = 95534 OverallScore 1 CC trials 1 IC trials 1 CI trials 0 II trials 0 CC RT 3334.1666666666665 IC RT 2873.625 CI RT 2883.1428571428573 II RT 2982.1666666666665 Problems CorrectAnswer ProbeText ProbeColour RightProbe LeftProbe ResponseChoice Feedback RT ICL Left RED 255 RED BLUE Left CORRECT 6063 CCR Right RED 16711680 RED BLUE Right CORRECT 3285 IIR Right RED 255 BLUE RED Left INCO…	1		2017-07-24 16:19:16 UTC	2017-07-24 16:16:18 UTC	Mozilla/5.0 (Macintosh; Intel Mac OS X 10_12_5) AppleWebKit/603.2.4 (KHTML, like Gecko) Version/10.1.1 Safari/603.2.4	Safari	Mac OS X
751	69362	1627	15091	847	38605	5		Task duration = 95395 5 out of 9 attempted ProbeText OuterImg InnerImg Response Feedback RT Square does not contain circle Square Circle false CORRECT 13275 Square is not encapsulated by circle Square Circle true CORRECT 8316 Circle does not contain square Square Circle true CORRECT 5593 Square is smaller than circle Square Circle false CORRECT 5804 Circle is encapsulated by square Square Circle …	1		2017-07-24 16:15:49 UTC	2017-07-24 16:18:24 UTC	Mozilla/5.0 (Macintosh; Intel Mac OS X 10_12_5) AppleWebKit/603.2.4 (KHTML, like Gecko) Version/10.1.1 Safari/603.2.4	Safari	Mac OS X
751	69362	1627	15089	848	38605	6	4.14286	Task duration 135546 MaxScore 6 MeanScore 4.142857142857143 TargetString ResponseString RT Feedback 238 238 7080 CORRECT! 6139 6139 3955 CORRECT! 2021231 2021231 5417 CORRECT! 1523581 1523581 6929 CORRECT! 20916522 20916225 8011 INCORRECT! 1543511 1534511 9363 INCORRECT! 1922511 1922511 5341 CORRECT! 92552423 92552423 8706 CORRECT! 17201621188 17201621188 8116 CORRECT! 242112215118 241221211815 1…	1		2017-07-24 16:08:51 UTC	2017-07-24 16:11:15 UTC	Mozilla/5.0 (Macintosh; Intel Mac OS X 10_12_5) AppleWebKit/603.2.4 (KHTML, like Gecko) Version/10.1.1 Safari/603.2.4	Safari	Mac OS X
751	69050	1627	15111	853	37851	3	2.5	Task duration 138120 AvgCorrect 2.5 MaxScore 3 24.gif 42622 Response 1 of 3 Empty 21.gif 1423 Response 2 of 3 Empty 7.gif 1529 Token 1 of 4 16.gif 2352 Response 1 of 2 Empty 24.gif 4658 Token 2 of 4 21.gif 841 Token 3 of 4 7.gif 824 Response 1 of 1 Found ERROR! 25.gif 19450 Response 1 of 2 Empty 14.gif 929 Token 1 of 3 11.gif 1317 Token 2 of 3 14.gif 23858 Response 1 of 1 Found ERROR! 19.gif 681 …	1	2017-06-22 18:25:09 UTC	2017-06-22 18:29:47 UTC	Mozilla/5.0 (Macintosh; Intel Mac OS X 10_12_5) AppleWebKit/603.2.4 (KHTML, like Gecko) Version/10.1.1 Safari/603.2.4	Safari	Mac OS X	Desktop
751	69050	1627	15109	851	37851	-4	Attempted 18 Errors 8 Max 3 Score -4 CorrectScore 14	Task duration 95597 OverallScore -4 Attempted 18 Errors 8 Max 3 Score -4 CorrectScore 14 TypeOfTrial ShapeTypeRight ShapeTypeLeft CopyingWhichSide Feedback CurrentScore RT Match 3 3 Left CORRECT 1 5812 Mismatch 4 6 Left CORRECT 2 12172 Mismatch 3 5 Left INCORRECT! 0 6449 Mismatch 4 5 Left INCORRECT! -2 4574 Mismatch 3 5 Right CORRECT -1 2021 Mismatch 3 6 Left CORRECT 0 3433 Mismatch 5 3 Right COR…	1	2017-06-22 18:17:27 UTC	2017-06-22 18:19:08 UTC	Mozilla/5.0 (Macintosh; Intel Mac OS X 10_12_5) AppleWebKit/603.2.4 (KHTML, like Gecko) Version/10.1.1 Safari/603.2.4	Safari	Mac OS X	Desktop
751	69050	1627	15107	850	37851	3	2.66667	Task duration 105798 MaxScore: 3 MeanScore 2.6666666666666665 TargetString ResponseString RT Feedback 2017 17 12145 Incorrect 2313 2313 6532 Correct 231215 231215 9372 Correct 4181320 18 5685 Incorrect 1214 1214 8541 Correct 39194 319 6215 Incorrect	1	2017-06-22 18:12:22 UTC	2017-06-22 18:15:43 UTC	Mozilla/5.0 (Macintosh; Intel Mac OS X 10_12_5) AppleWebKit/603.2.4 (KHTML, like Gecko) Version/10.1.1 Safari/603.2.4	Safari	Mac OS X	Desktop
751	69050	1627	15105	855	37851	3	3	Task duration 187130 Batch: Song: OverallScore 3 DifficultyLevel Feedback MovesMade RT 1 Failed! 6 110798 1 CORRECT! 3 19951	1	2017-06-22 18:08:10 UTC	2017-06-22 18:11:58 UTC	Mozilla/5.0 (Macintosh; Intel Mac OS X 10_12_5) AppleWebKit/603.2.4 (KHTML, like Gecko) Version/10.1.1 Safari/603.2.4	Safari	Mac OS X	Desktop
751	69050	1627	15103	844	37851	5	4	Task duration 95794 MaxScore 5 MeanScore 4 TargetString ResponseString RT Feedback 1047 0474 12240 INCORRECT! 680 680 3685 CORRECT! 6247 6247 3287 CORRECT! 56804 56804 4820 CORRECT! 674032 674324 12870 INCORRECT! 10768 24587 18240 INCORRECT!	1	2017-06-22 18:01:19 UTC	2017-06-22 18:03:46 UTC	Mozilla/5.0 (Macintosh; Intel Mac OS X 10.12; rv:54.0) Gecko/20100101 Firefox/54.0	Firefox	Mac OS X	Desktop
751	69050	1627	15101	846	37851	36	Attempted 11 Errors 0 Max 6 Score 36 CorrectScore 36	Task duration 96405 OverallScore 36 Attempted 11 Errors 0 Max 6 Score 36 CorrectScore 36 TrialType FeedbackText.text CurrentScore RT Matched CORRECT 1 6456 Matched CORRECT 2 5195 Matched CORRECT 4 4718 Mismatched CORRECT 6 5180 Matched CORRECT 9 8457 Mismatched CORRECT 12 5362 Mismatched CORRECT 16 7244 Matched CORRECT 20 6538 Mismatched CORRECT 25 7146 Matched CORRECT 30 11579 Mismatched CORRECT…	1	2017-06-22 18:00:37 UTC	2017-06-22 18:03:42 UTC	Mozilla/5.0 (Macintosh; Intel Mac OS X 10.12; rv:54.0) Gecko/20100101 Firefox/54.0	Firefox	Mac OS X	Desktop
751	69050	1627	15099	852	37851	18	Attempted 10 Errors 3 Max 6 Score 18 CorrectScore 34	Task duration: 95596 OverallScore 18 Attempted 10 Errors 3 Max 6 Score 18 CorrectScore 34 TrialType Angle Feedback Score RT Match 270 CORRECT 4 8096 Match 90 INCORRECT! 0 10914 Match 90 CORRECT 4 3451 Mismatch 270 CORRECT 8 13591 Mismatch 270 INCORRECT! 3 15765 Mismatch 90 CORRECT 8 1881 Match 180 CORRECT 13 4394 Match 180 CORRECT 19 6337 Mismatch 180 CORRECT 25 14006 Mismatch 90 INCORRECT! 18 54…	1	2017-06-22 17:54:42 UTC	2017-06-22 17:54:52 UTC	Mozilla/5.0 (Macintosh; Intel Mac OS X 10.12; rv:54.0) Gecko/20100101 Firefox/54.0	Firefox	Mac OS X	Desktop
751	69050	1627	15097	854	37851	4	3.66667	Task duration 108907 MaxScore 4 MeanScore 3.6666666666666665 TargetString ResponseString RT Feedback 37136 37135 12753 INCORRECT! 71511 71511 4443 CORRECT! 1214113 1214113 9612 CORRECT! 751911 751109 8773 INCORRECT! 157142 157142 6175 CORRECT! 510781 510718 8392 INCORRECT!	1	2017-06-22 17:47:32 UTC	2017-06-22 17:53:05 UTC	Mozilla/5.0 (Macintosh; Intel Mac OS X 10.12; rv:54.0) Gecko/20100101 Firefox/54.0	Firefox	Mac OS X	Desktop
751	69050	1627	15095	849	37851	7	Attempted 9 Errors 1 Max 8 Score 7	Task duration 187574 OverallScore 7 Attempted 9 Errors 1 Max 8 Score 7 OddOneOut Selection Correct Level On Responded RT Score 4 4 CORRECT 1 46933 60036 13103 0 8 8 CORRECT 2 61418 75292 13874 1 3 3 CORRECT 3 76564 95980 19416 2 1 1 CORRECT 4 97313 103365 6052 3 4 4 CORRECT 6 104648 125606 20958 4 4 4 CORRECT 7 126904 144823 17919 5 7 7 CORRECT 5 146189 154791 8602 6 6 7 ERROR!! 8 156106 178072 2…	1	2017-06-22 17:44:04 UTC	2017-06-22 17:47:24 UTC	Mozilla/5.0 (Macintosh; Intel Mac OS X 10.12; rv:54.0) Gecko/20100101 Firefox/54.0	Firefox	Mac OS X	Desktop
751	69050	1627	15093	845	37851	6	CC trials 1 IC trials 1 CI trials 1 II trials 0.5 CC RT 7851 IC RT 11233 CI RT 15542 II RT 10145	Task duration = 95939 OverallScore 6 CC trials 1 IC trials 1 CI trials 1 II trials 0.5 CC RT 7851 IC RT 11233 CI RT 15542 II RT 10145 Problems CorrectAnswer ProbeText ProbeColour RightProbe LeftProbe ResponseChoice Feedback RT CCR Right BLUE 255 BLUE RED Right CORRECT 11510 CCL Left RED 16711680 BLUE RED Left CORRECT 4192 IIR Right BLUE 16711680 RED BLUE Right CORRECT 12485 IIL Left RED 255 RED B…	1	2017-06-22 17:38:44 UTC	2017-06-22 17:38:41 UTC	Mozilla/5.0 (Macintosh; Intel Mac OS X 10.12; rv:54.0) Gecko/20100101 Firefox/54.0	Firefox	Mac OS X	Desktop
751	69050	1627	15091	847	37851	1		Task duration = 95265 1 out of 7 attempted ProbeText OuterImg InnerImg Response Feedback RT Square contains circle Square Circle true CORRECT 10087 Circle is smaller than square Square Circle true CORRECT 5445 Square is not smaller than circle Square Circle false INCORRECT! 13284 Circle does not encapsulate square Square Circle true INCORRECT! 10075 Circle encapsulates square Square Circle true C…	1	2017-06-22 16:39:31 UTC	2017-06-22 16:41:27 UTC	Mozilla/5.0 (Macintosh; Intel Mac OS X 10_12_5) AppleWebKit/603.2.4 (KHTML, like Gecko) Version/10.1.1 Safari/603.2.4	Safari	Mac OS X	Desktop
751	69050	1627	15089	848	37851	4	3.4	Task duration 140882 MaxScore 4 MeanScore 3.4 TargetString ResponseString RT Feedback 58 58 11699 CORRECT! 22123 22123 13256 CORRECT! 1232223 1232223 11900 CORRECT! 1713231822 1317182223 18108 INCORRECT! 219413 219413 11508 CORRECT! 25617924 25179624 10205 INCORRECT! 914247 914247 5212 CORRECT! 12121106 12162110 13513 INCORRECT!	1	2017-06-22 16:33:02 UTC	2017-06-22 16:35:33 UTC	Mozilla/5.0 (Macintosh; Intel Mac OS X 10_12_5) AppleWebKit/603.2.4 (KHTML, like Gecko) Version/10.1.1 Safari/603.2.4	Safari	Mac OS X	Desktop
751	69035	1627	15111	853	37790	4	3.66667	Task duration 246059 AvgCorrect 3.6666666666666665 MaxScore 4 23.gif 12668 Response 1 of 3 Empty 11.gif 9306 Response 2 of 3 Empty 17.gif 4286 Token 1 of 4 23.gif 7420 Response 1 of 2 Empty 11.gif 12003 Token 2 of 4 17.gif 16351 Response 1 of 1 Found ERROR! 18.gif 6149 Response 1 of 2 Empty 7.gif 3099 Token 1 of 3 18.gif 5406 Token 2 of 3 14.gif 3142 Token 3 of 3 completed 23.gif 18485 Response 1…	1	2017-06-21 16:22:23 UTC	2017-06-21 16:24:34 UTC	Mozilla/5.0 (Macintosh; Intel Mac OS X 10_12_5) AppleWebKit/603.2.4 (KHTML, like Gecko) Version/10.1.1 Safari/603.2.4	Safari	Mac OS X	Desktop
751	69035	1627	15109	851	37790	4	Attempted 8 Errors 2 Max 3 Score 4 CorrectScore 12	Task duration 95721 OverallScore 4 Attempted 8 Errors 2 Max 3 Score 4 CorrectScore 12 TypeOfTrial ShapeTypeRight ShapeTypeLeft CopyingWhichSide Feedback CurrentScore RT Mismatch 5 4 Left CORRECT 1 7878 Mismatch 5 6 Left CORRECT 2 6678 Match 3 3 Left CORRECT 4 19768 Match 5 5 Left CORRECT 6 6283 Mismatch 5 5 Left CORRECT 9 8026 Match 6 6 Left CORRECT 12 7704 Match 6 6 Left INCORRECT! 8 14091 Match…	1	2017-06-21 16:18:13 UTC	2017-06-21 16:20:34 UTC	Mozilla/5.0 (Macintosh; Intel Mac OS X 10_12_5) AppleWebKit/603.2.4 (KHTML, like Gecko) Version/10.1.1 Safari/603.2.4	Safari	Mac OS X	Desktop
751	69035	1627	15107	850	37790	2	2	Task duration 75722 MaxScore: 2 MeanScore 2 TargetString ResponseString RT Feedback 35 35 14870 Correct 71621 721 15828 Incorrect 310 10 5168 Incorrect 913 13 5603 Incorrect	1	2017-06-21 16:15:25 UTC	2017-06-21 16:17:31 UTC	Mozilla/5.0 (Macintosh; Intel Mac OS X 10_12_5) AppleWebKit/603.2.4 (KHTML, like Gecko) Version/10.1.1 Safari/603.2.4	Safari	Mac OS X	Desktop
751	69035	1627	15105	855	37790	0	0	Task duration 187576 Batch: Song: OverallScore 0 DifficultyLevel Feedback MovesMade RT	1	2017-06-21 16:09:01 UTC	2017-06-21 16:13:08 UTC	Mozilla/5.0 (Macintosh; Intel Mac OS X 10_12_5) AppleWebKit/603.2.4 (KHTML, like Gecko) Version/10.1.1 Safari/603.2.4	Safari	Mac OS X	Desktop
751	69035	1627	15103	844	37790	0	0	Task duration 76656 MaxScore 0 MeanScore 0 TargetString ResponseString RT Feedback 0647 2314 30241 INCORRECT! 276 123 17817 INCORRECT! 04 34 10404 INCORRECT!	1	2017-06-21 15:55:40 UTC	2017-06-21 15:55:22 UTC	Mozilla/5.0 (Macintosh; Intel Mac OS X 10_12_5) AppleWebKit/603.2.4 (KHTML, like Gecko) Version/10.1.1 Safari/603.2.4	Safari	Mac OS X	Desktop
751	69035	1627	15101	846	37790	4	Attempted 13 Errors 5 Max 3 Score 4 CorrectScore 15	Task duration 95605 OverallScore 4 Attempted 13 Errors 5 Max 3 Score 4 CorrectScore 15 TrialType FeedbackText.text CurrentScore RT Mismatched INCORRECT! -1 6331 Matched CORRECT 0 7911 Matched CORRECT 1 4218 Matched CORRECT 3 3838 Matched CORRECT 5 3790 Matched CORRECT 8 5492 Mismatched INCORRECT! 5 5669 Mismatched INCORRECT! 2 9823 Matched CORRECT 4 7082 Mismatched INCORRECT! 2 5076 Matched CORRE…	1	2017-06-21 15:52:28 UTC	2017-06-21 15:53:58 UTC	Mozilla/5.0 (Macintosh; Intel Mac OS X 10_12_5) AppleWebKit/603.2.4 (KHTML, like Gecko) Version/10.1.1 Safari/603.2.4	Safari	Mac OS X	Desktop
751	69035	1627	15099	852	37790	-2	Attempted 6 Errors 3 Max 4 Score -2 CorrectScore 10	Task duration: 95747 OverallScore -2 Attempted 6 Errors 3 Max 4 Score -2 CorrectScore 10 TrialType Angle Feedback Score RT Mismatch 180 INCORRECT! -4 10401 Match 270 INCORRECT! -8 13255 Mismatch 180 CORRECT -5 4251 Mismatch 90 CORRECT -2 7476 Match 270 CORRECT 2 21038 Mismatch 270 INCORRECT! -2 25425	1	2017-06-21 15:48:00 UTC	2017-06-21 15:50:30 UTC	Mozilla/5.0 (Macintosh; Intel Mac OS X 10_12_5) AppleWebKit/603.2.4 (KHTML, like Gecko) Version/10.1.1 Safari/603.2.4	Safari	Mac OS X	Desktop
751	69035	1627	15097	854	37790	3	3	Task duration 184154 MaxScore 3 MeanScore 3 TargetString ResponseString RT Feedback 137109 10623 75059 INCORRECT! 1213 1213 13031 CORRECT! 68137 6123 39486 INCORRECT! 14313 1479 19009 INCORRECT!	1	2017-06-21 15:42:32 UTC	2017-06-21 15:46:50 UTC	Mozilla/5.0 (Macintosh; Intel Mac OS X 10_12_5) AppleWebKit/603.2.4 (KHTML, like Gecko) Version/10.1.1 Safari/603.2.4	Safari	Mac OS X	Desktop
751	69035	1627	15095	849	37790	7	Attempted 9 Errors 1 Max 8 Score 7	Task duration 187130 OverallScore 7 Attempted 9 Errors 1 Max 8 Score 7 OddOneOut Selection Correct Level On Responded RT Score 4 4 CORRECT 1 53588 60753 7165 0 6 6 CORRECT 2 62054 68209 6155 1 8 8 CORRECT 3 69472 88769 19297 2 5 8 ERROR!! 4 90085 139059 48974 3 4 4 CORRECT 4 140336 154323 13987 2 9 9 CORRECT 8 155638 192004 36366 3 8 8 CORRECT 6 193305 201973 8668 4 5 5 CORRECT 5 203308 217197 13…	1	2017-06-21 15:36:35 UTC	2017-06-21 15:40:35 UTC	Mozilla/5.0 (Macintosh; Intel Mac OS X 10_12_5) AppleWebKit/603.2.4 (KHTML, like Gecko) Version/10.1.1 Safari/603.2.4	Safari	Mac OS X	Desktop
751	69035	1627	15093	845	37790	0	CC trials 1 IC trials 0 CI trials 1 II trials 0 CC RT 8965 IC RT 8371.666666666666 CI RT 8303.333333333334 II RT 9579	Task duration = 95525 OverallScore 0 CC trials 1 IC trials 0 CI trials 1 II trials 0 CC RT 8965 IC RT 8371.666666666666 CI RT 8303.333333333334 II RT 9579 Problems CorrectAnswer ProbeText ProbeColour RightProbe LeftProbe ResponseChoice Feedback RT IIR Right RED 255 BLUE RED Left INCORRECT! 14018 CIR Right RED 16711680 RED BLUE Right CORRECT 9970 CCL Left RED 16711680 BLUE RED Left CORRECT 12355 C…	1	2017-06-21 15:30:57 UTC	2017-06-21 15:35:08 UTC	Mozilla/5.0 (Macintosh; Intel Mac OS X 10_12_5) AppleWebKit/603.2.4 (KHTML, like Gecko) Version/10.1.1 Safari/603.2.4	Safari	Mac OS X	Desktop
751	69035	1627	15091	847	37790	0		Task duration = 95562 0 out of 10 attempted ProbeText OuterImg InnerImg Response Feedback RT Circle contains square Square Circle true INCORRECT! 11320 Circle encapsulates square Square Circle false CORRECT 5360 Square is smaller than circle Square Circle false INCORRECT! 3409 Circle is bigger than square Square Circle true INCORRECT! 7637 Circle does not encapsulate square Square Circle true INC…	1	2017-06-21 15:30:43 UTC	2017-06-21 15:32:36 UTC	Mozilla/5.0 (Macintosh; Intel Mac OS X 10_12_5) AppleWebKit/603.2.4 (KHTML, like Gecko) Version/10.1.1 Safari/603.2.4	Safari	Mac OS X	Desktop
751	69035	1627	15089	848	37790	2	2	Task duration 180467 MaxScore 2 MeanScore 2 TargetString ResponseString RT Feedback 128 128 13698 CORRECT! 242317 241723 38850 INCORRECT! 101 101 43694 CORRECT! 51416 51614 22127 INCORRECT! 2416 2416 15504 CORRECT! 121522 122215 20357 INCORRECT!	1	2017-06-21 15:22:52 UTC	2017-06-21 15:28:53 UTC	Mozilla/5.0 (Macintosh; Intel Mac OS X 10_12_5) AppleWebKit/603.2.4 (KHTML, like Gecko) Version/10.1.1 Safari/603.2.4	Safari	Mac OS X	Desktop
751	68696	1627	15111	853	37281	7	5.5	Task duration 149638 AvgCorrect 5.5 MaxScore 7 13.gif 9222 Response 1 of 3 Empty 18.gif 1143 Response 2 of 3 Empty 1.gif 306 Token 1 of 4 18.gif 5824 Response 1 of 2 Empty 20.gif 604 Token 2 of 4 18.gif 2809 Token 3 of 4 13.gif 1011 Token 4 of 4 completed 13.gif 880 Response 1 of 2 Empty 23.gif 511 Token 1 of 5 13.gif 1472 Response 1 of 3 Empty 19.gif 698 Response 2 of 3 Empty 16.gif 734 Token 2 …	1	2017-06-08 19:22:08 UTC	2017-06-08 19:23:41 UTC	Mozilla/5.0 (Macintosh; Intel Mac OS X 10_12_5) AppleWebKit/603.2.4 (KHTML, like Gecko) Version/10.1.1 Safari/603.2.4	Safari	Mac OS X	Desktop
751	68696	1627	15109	851	37281	39	Attempted 21 Errors 5 Max 6 Score 39 CorrectScore 51	Task duration 95058 OverallScore 39 Attempted 21 Errors 5 Max 6 Score 39 CorrectScore 51 TypeOfTrial ShapeTypeRight ShapeTypeLeft CopyingWhichSide Feedback CurrentScore RT Match 6 5 Left INCORRECT! -1 3981 Mismatch 4 4 Right CORRECT 0 2882 Mismatch 6 3 Left INCORRECT! -1 1757 Match 6 6 Right CORRECT 0 2083 Mismatch 4 4 Right CORRECT 1 2908 Mismatch 3 3 Left INCORRECT! -1 3646 Mismatch 3 5 Right I…	1	2017-06-08 19:16:32 UTC	2017-06-08 19:20:23 UTC	Mozilla/5.0 (Macintosh; Intel Mac OS X 10_12_5) AppleWebKit/603.2.4 (KHTML, like Gecko) Version/10.1.1 Safari/603.2.4	Safari	Mac OS X	Desktop
751	68696	1627	15107	850	37281	2	2	Task duration 65617 MaxScore: 2 MeanScore 2 TargetString ResponseString RT Feedback 203 3 8001 Incorrect 185 185 6668 Correct 51924 19 1340 Incorrect 1618 1618 3341 Correct 91612 912 3231 Incorrect	1	2017-06-08 19:15:24 UTC	2017-06-08 19:17:01 UTC	Mozilla/5.0 (Macintosh; Intel Mac OS X 10_12_5) AppleWebKit/603.2.4 (KHTML, like Gecko) Version/10.1.1 Safari/603.2.4	Safari	Mac OS X	Desktop
751	68696	1627	15105	855	37281	12	12	Task duration 187270 Batch: Song: OverallScore 12 DifficultyLevel Feedback MovesMade RT 1 CORRECT! 5 102490 2 CORRECT! 3 24289 3 CORRECT! 4 21796 4 CORRECT! 4 13404	1	2017-06-08 19:11:43 UTC	2017-06-08 19:14:55 UTC	Mozilla/5.0 (Macintosh; Intel Mac OS X 10_12_5) AppleWebKit/603.2.4 (KHTML, like Gecko) Version/10.1.1 Safari/603.2.4	Safari	Mac OS X	Desktop
751	68696	1627	15103	844	37281	7	5.5	Task duration 115706 MaxScore 7 MeanScore 5.5 TargetString ResponseString RT Feedback 2165 2165 4957 CORRECT! 05632 05632 4654 CORRECT! 890451 890451 7401 CORRECT! 0832614 0832614 9105 CORRECT! 69083415 69083145 11071 INCORRECT! 6597238 6957238 10620 INCORRECT! 398475 398478 11456 INCORRECT!	1	2017-06-08 19:06:53 UTC	2017-06-08 19:06:54 UTC	Mozilla/5.0 (Macintosh; Intel Mac OS X 10_12_5) AppleWebKit/603.2.4 (KHTML, like Gecko) Version/10.1.1 Safari/603.2.4	Safari	Mac OS X	Desktop
751	68696	1627	15101	846	37281	90	Attempted 20 Errors 1 Max 10 Score 90 CorrectScore 100	Task duration 95506 OverallScore 90 Attempted 20 Errors 1 Max 10 Score 90 CorrectScore 100 TrialType FeedbackText.text CurrentScore RT Mismatched CORRECT 1 1747 Matched CORRECT 2 1515 Matched CORRECT 4 1973 Matched CORRECT 6 1194 Mismatched CORRECT 9 1923 Matched CORRECT 12 3233 Matched CORRECT 16 2317 Mismatched CORRECT 20 2948 Mismatched CORRECT 25 2545 Mismatched CORRECT 30 4242 Matched CORREC…	1	2017-06-08 19:03:53 UTC	2017-06-08 19:04:23 UTC	Mozilla/5.0 (Macintosh; Intel Mac OS X 10_12_5) AppleWebKit/603.2.4 (KHTML, like Gecko) Version/10.1.1 Safari/603.2.4	Safari	Mac OS X	Desktop
751	68696	1627	15099	852	37281	84	Attempted 19 Errors 3 Max 9 Score 84 CorrectScore 106	Task duration: 95503 OverallScore 84 Attempted 19 Errors 3 Max 9 Score 84 CorrectScore 106 TrialType Angle Feedback Score RT Match 180 CORRECT 4 3802 Match 180 CORRECT 8 2417 Mismatch 180 CORRECT 13 2892 Mismatch 90 CORRECT 18 2648 Mismatch 90 CORRECT 24 2297 Match 270 INCORRECT! 18 2281 Mismatch 270 CORRECT 24 3610 Match 270 CORRECT 30 5300 Match 270 CORRECT 37 2654 Mismatch 270 CORRECT 44 2924 …	1	2017-06-08 19:01:29 UTC	2017-06-08 19:03:33 UTC	Mozilla/5.0 (Macintosh; Intel Mac OS X 10_12_5) AppleWebKit/603.2.4 (KHTML, like Gecko) Version/10.1.1 Safari/603.2.4	Safari	Mac OS X	Desktop
751	68696	1627	15097	854	37281	5	4.5	Task duration 102584 MaxScore 5 MeanScore 4.5 TargetString ResponseString RT Feedback 15813 15813 5002 CORRECT! 157368 157368 3388 CORRECT! 39126713 36912107 4627 INCORRECT! 137811 1381114 4213 INCORRECT! 112015 112015 3926 CORRECT! 121705 121705 3170 CORRECT! 6121481015 6814121510 4368 INCORRECT!	1	2017-06-08 18:58:41 UTC	2017-06-08 19:00:47 UTC	Mozilla/5.0 (Macintosh; Intel Mac OS X 10_12_5) AppleWebKit/603.2.4 (KHTML, like Gecko) Version/10.1.1 Safari/603.2.4	Safari	Mac OS X	Desktop
751	68696	1627	15095	849	37281	9	Attempted 19 Errors 5 Max 14 Score 9	Task duration 186923 OverallScore 9 Attempted 19 Errors 5 Max 14 Score 9 OddOneOut Selection Correct Level On Responded RT Score 1 1 CORRECT 1 7476 9510 2034 0 5 5 CORRECT 2 10861 16949 6088 1 6 6 CORRECT 3 18308 24326 6018 2 9 8 ERROR!! 4 25641 30070 4429 3 2 2 CORRECT 4 31442 35374 3932 2 4 4 CORRECT 6 36690 42254 5564 3 5 5 CORRECT 5 43690 48990 5300 4 3 5 ERROR!! 7 50288 59711 9423 5 1 1 CORR…	1	2017-06-08 18:55:04 UTC	2017-06-08 18:56:17 UTC	Mozilla/5.0 (Macintosh; Intel Mac OS X 10_12_5) AppleWebKit/603.2.4 (KHTML, like Gecko) Version/10.1.1 Safari/603.2.4	Safari	Mac OS X	Desktop
751	68696	1627	15093	845	37281	-3	CC trials 0.6470588235294118 IC trials 0.3888888888888889 CI trials 0.5625 II trials 0.3125 CC RT 858.3529411764706 IC RT 1293.6666666666667 CI RT 1040.3125 II RT 986.875	Task duration = 95571 OverallScore -3 CC trials 0.6470588235294118 IC trials 0.3888888888888889 CI trials 0.5625 II trials 0.3125 CC RT 858.3529411764706 IC RT 1293.6666666666667 CI RT 1040.3125 II RT 986.875 Problems CorrectAnswer ProbeText ProbeColour RightProbe LeftProbe ResponseChoice Feedback RT IIR Right BLUE 16711680 RED BLUE Right CORRECT 5150 CIR Right BLUE 255 BLUE RED Right CORRECT 264…	1	2017-06-08 18:49:09 UTC	2017-06-08 18:50:56 UTC	Mozilla/5.0 (Macintosh; Intel Mac OS X 10_12_5) AppleWebKit/603.2.4 (KHTML, like Gecko) Version/10.1.1 Safari/603.2.4	Safari	Mac OS X	Desktop
751	68696	1627	15091	847	37281	13		Task duration = 95331 13 out of 19 attempted ProbeText OuterImg InnerImg Response Feedback RT Circle encapsulates square Square Circle false CORRECT 7239 Circle is not bigger than square Square Circle false CORRECT 3116 Square is not smaller than circle Square Circle false CORRECT 3482 Circle does not contain square Square Circle false INCORRECT! 3323 Circle does not encapsulate square Square Cir…	1	2017-06-08 18:46:15 UTC	2017-06-08 18:50:07 UTC	Mozilla/5.0 (Macintosh; Intel Mac OS X 10_12_5) AppleWebKit/603.2.4 (KHTML, like Gecko) Version/10.1.1 Safari/603.2.4	Safari	Mac OS X	Desktop
751	68696	1627	15089	848	37281	6	4.16667	Task duration 102518 MaxScore 6 MeanScore 4.166666666666667 TargetString ResponseString RT Feedback 217 217 6908 CORRECT! 2268 2268 3249 CORRECT! 1025120 1025120 3918 CORRECT! 18223617 18223617 3936 CORRECT! 52421152022 52421152220 5217 INCORRECT! 41021113 41021113 4007 CORRECT! 17144211619 17144211619 4134 CORRECT! 20162417212318 20162317182421 8045 INCORRECT! 4152451820 4152418205 4734 INCORREC…	1	2017-06-08 18:45:15 UTC	2017-06-08 18:45:50 UTC	Mozilla/5.0 (Macintosh; Intel Mac OS X 10_12_5) AppleWebKit/603.2.4 (KHTML, like Gecko) Version/10.1.1 Safari/603.2.4	Safari	Mac OS X	Desktop
751	68657	1627	15101	846	37220	18	Attempted 20 Errors 7 Max 5 Score 18 CorrectScore 34	Task duration 95469 OverallScore 18 Attempted 20 Errors 7 Max 5 Score 18 CorrectScore 34 TrialType FeedbackText.text CurrentScore RT Matched INCORRECT! -1 3451 Matched CORRECT 0 3113 Matched CORRECT 1 2072 Mismatched INCORRECT! -1 3646 Matched CORRECT 1 2761 Matched CORRECT 3 2989 Matched CORRECT 6 5369 Mismatched INCORRECT! 3 4661 Mismatched INCORRECT! 0 2830 Matched INCORRECT! -2 3412 Matched C…	1	2017-06-06 18:00:34 UTC	2017-06-06 18:04:13 UTC	Mozilla/5.0 (Macintosh; Intel Mac OS X 10_12_4) AppleWebKit/537.36 (KHTML, like Gecko) Chrome/58.0.3029.110 Safari/537.36	Chrome	Mac OS X	Desktop
751	68657	1627	15099	852	37220	20	Attempted 19 Errors 7 Max 7 Score 20 CorrectScore 67	Task duration: 95683 OverallScore 20 Attempted 19 Errors 7 Max 7 Score 20 CorrectScore 67 TrialType Angle Feedback Score RT Mismatch 90 CORRECT 4 7992 Mismatch 180 CORRECT 8 3811 Mismatch 270 CORRECT 13 3170 Mismatch 90 CORRECT 18 2214 Mismatch 270 CORRECT 24 3815 Match 270 CORRECT 30 3130 Match 180 INCORRECT! 23 10382 Mismatch 270 INCORRECT! 16 1889 Mismatch 270 CORRECT 22 2266 Match 180 CORRECT…	1	2017-06-06 17:57:46 UTC	2017-06-06 17:57:35 UTC	Mozilla/5.0 (Macintosh; Intel Mac OS X 10_12_4) AppleWebKit/537.36 (KHTML, like Gecko) Chrome/58.0.3029.110 Safari/537.36	Chrome	Mac OS X	Desktop
751	68657	1627	15097	854	37220	2	2	Task duration 150952 MaxScore 2 MeanScore 2 TargetString ResponseString RT Feedback 126135 151014 66601 INCORRECT! 693 339 33676 INCORRECT! 140 140 10609 CORRECT! 101411 101114 4699 INCORRECT!	1	2017-06-06 17:54:01 UTC	2017-06-06 17:56:52 UTC	Mozilla/5.0 (Macintosh; Intel Mac OS X 10_12_4) AppleWebKit/537.36 (KHTML, like Gecko) Chrome/58.0.3029.110 Safari/537.36	Chrome	Mac OS X	Desktop
751	68657	1627	15095	849	37220	-2	Attempted 18 Errors 10 Max 8 Score -2	Task duration 187403 OverallScore -2 Attempted 18 Errors 10 Max 8 Score -2 OddOneOut Selection Correct Level On Responded RT Score 4 4 CORRECT 1 8055 18629 10574 0 9 9 CORRECT 2 19969 29564 9595 1 4 4 CORRECT 3 30977 36203 5226 2 3 3 CORRECT 4 37494 43523 6029 3 1 9 ERROR!! 5 44879 54675 9796 4 6 2 ERROR!! 5 56050 69747 13697 3 1 1 CORRECT 6 71136 78268 7132 2 9 3 ERROR!! 6 79552 91587 12035 3 7 …	1	2017-06-06 17:47:50 UTC	2017-06-06 17:50:54 UTC	Mozilla/5.0 (Macintosh; Intel Mac OS X 10_12_4) AppleWebKit/537.36 (KHTML, like Gecko) Chrome/58.0.3029.110 Safari/537.36	Chrome	Mac OS X	Desktop
751	68657	1627	15093	845	37220	5	CC trials 1 IC trials 0.8 CI trials 0.5 II trials 0.25 CC RT 4277 IC RT 5615.4 CI RT 4872.75 II RT 3837.5	Task duration = 95314 OverallScore 5 CC trials 1 IC trials 0.8 CI trials 0.5 II trials 0.25 CC RT 4277 IC RT 5615.4 CI RT 4872.75 II RT 3837.5 Problems CorrectAnswer ProbeText ProbeColour RightProbe LeftProbe ResponseChoice Feedback RT CCL Left BLUE 255 RED BLUE Left CORRECT 9226 IIR Right BLUE 16711680 RED BLUE Right CORRECT 7261 CIR Right BLUE 255 BLUE RED Left INCORRECT! 4020 ICR Right BLUE 16…	1	2017-06-06 17:43:30 UTC	2017-06-06 17:45:45 UTC	Mozilla/5.0 (Macintosh; Intel Mac OS X 10_12_4) AppleWebKit/537.36 (KHTML, like Gecko) Chrome/58.0.3029.110 Safari/537.36	Chrome	Mac OS X	Desktop
751	68657	1627	15091	847	37220	7		Task duration = 95591 7 out of 11 attempted ProbeText OuterImg InnerImg Response Feedback RT Circle is encapsulated by square Square Circle true CORRECT 5441 Circle is not bigger than square Square Circle true CORRECT 7859 Circle is not encapsulated by square Square Circle false CORRECT 7778 Square is bigger than circle Square Circle true CORRECT 4386 Circle is contained by square Square Circle t…	1	2017-06-06 17:39:34 UTC	2017-06-06 17:41:17 UTC	Mozilla/5.0 (Macintosh; Intel Mac OS X 10_12_4) AppleWebKit/537.36 (KHTML, like Gecko) Chrome/58.0.3029.110 Safari/537.36	Chrome	Mac OS X	Desktop
751	68657	1627	15089	848	37220	4	2.75	Task duration 114750 MaxScore 4 MeanScore 2.75 TargetString ResponseString RT Feedback 2423 2423 21076 CORRECT! 23247 24237 22021 INCORRECT! 127 712 12798 INCORRECT! 201 201 6174 CORRECT! 2421 2421 5248 CORRECT! 5131121 5131121 6180 CORRECT! 25523148 25523814 7913 INCORRECT!	2	2017-06-06 17:34:45 UTC	2017-06-06 17:36:51 UTC	Mozilla/5.0 (Macintosh; Intel Mac OS X 10_12_4) AppleWebKit/537.36 (KHTML, like Gecko) Chrome/58.0.3029.110 Safari/537.36	Chrome	Mac OS X	Desktop
751	68639	1627	15111	853	37196	3	2.5	Task duration 76257 AvgCorrect 2.5 MaxScore 3 18.gif 16973 Response 1 of 2 Empty 9.gif 4047 Token 1 of 4 14.gif 3899 Response 1 of 2 Empty 8.gif 2290 Token 2 of 4 18.gif 3849 Response 1 of 2 Empty 9.gif 1635 Response 2 of 2 Found ERROR! 20.gif 1304 Response 1 of 2 Empty 24.gif 1625 Token 1 of 3 15.gif 1960 Token 2 of 3 24.gif 2578 Response 1 of 1 Found ERROR! 7.gif 1717 Token 1 of 2 12.gif 1779 T…	1	2017-06-05 16:55:42 UTC	2017-06-05 16:57:10 UTC	Mozilla/5.0 (Macintosh; Intel Mac OS X 10_12_4) AppleWebKit/603.1.30 (KHTML, like Gecko) Version/10.1 Safari/603.1.30	Safari	Mac OS X	Desktop
751	68639	1627	15109	851	37196	-2	Attempted 24 Errors 12 Max 4 Score -2 CorrectScore 30	Task duration 95583 OverallScore -2 Attempted 24 Errors 12 Max 4 Score -2 CorrectScore 30 TypeOfTrial ShapeTypeRight ShapeTypeLeft CopyingWhichSide Feedback CurrentScore RT Match 5 4 Left INCORRECT! -1 7234 Match 3 3 Left INCORRECT! -2 9611 Mismatch 3 6 Left INCORRECT! -3 6064 Mismatch 6 5 Right CORRECT -2 5897 Match 4 4 Right CORRECT -1 2351 Match 4 4 Right CORRECT 1 2141 Match 5 5 Left CORRECT …	1	2017-06-05 16:52:35 UTC	2017-06-05 16:52:36 UTC	Mozilla/5.0 (Macintosh; Intel Mac OS X 10_12_4) AppleWebKit/603.1.30 (KHTML, like Gecko) Version/10.1 Safari/603.1.30	Safari	Mac OS X	Desktop
751	68639	1627	15107	850	37196	5	3.5	Task duration 135076 MaxScore: 5 MeanScore 3.5 TargetString ResponseString RT Feedback 1924 1924 6542 Correct 14410 14410 8507 Correct 9201713 9201713 10784 Correct 141923221 141923221 15830 Correct 611331024 1 3584 Incorrect 4212227 2 4161 Incorrect 1124610 24 4703 Incorrect	1	2017-06-05 16:48:00 UTC	2017-06-05 16:51:23 UTC	Mozilla/5.0 (Macintosh; Intel Mac OS X 10_12_4) AppleWebKit/603.1.30 (KHTML, like Gecko) Version/10.1 Safari/603.1.30	Safari	Mac OS X	Desktop
751	68639	1627	15105	855	37196	0	0	Task duration 187106 Batch: Song: OverallScore 0 DifficultyLevel Feedback MovesMade RT 1 Failed! 6 63574 1 Failed! 6 75236	1	2017-06-05 16:43:13 UTC	2017-06-05 16:46:47 UTC	Mozilla/5.0 (Macintosh; Intel Mac OS X 10_12_4) AppleWebKit/603.1.30 (KHTML, like Gecko) Version/10.1 Safari/603.1.30	Safari	Mac OS X	Desktop
751	68639	1627	15103	844	37196	4	3.5	Task duration 51842 MaxScore 4 MeanScore 3.5 TargetString ResponseString RT Feedback 3125 3215 3267 INCORRECT! 763 763 2865 CORRECT! 9107 9107 3456 CORRECT! 75214 75014 3622 INCORRECT! 4218 7248 6272 INCORRECT!	1	2017-06-05 16:39:05 UTC	2017-06-05 16:40:16 UTC	Mozilla/5.0 (Macintosh; Intel Mac OS X 10_12_4) AppleWebKit/603.1.30 (KHTML, like Gecko) Version/10.1 Safari/603.1.30	Safari	Mac OS X	Desktop
751	68639	1627	15101	846	37196	42	Attempted 18 Errors 3 Max 7 Score 42 CorrectScore 59	Task duration 95559 OverallScore 42 Attempted 18 Errors 3 Max 7 Score 42 CorrectScore 59 TrialType FeedbackText.text CurrentScore RT Matched CORRECT 1 6061 Matched CORRECT 2 3311 Mismatched CORRECT 4 2321 Mismatched CORRECT 6 2434 Matched CORRECT 9 2257 Mismatched CORRECT 12 3068 Mismatched CORRECT 16 2047 Mismatched CORRECT 20 2229 Matched CORRECT 25 2420 Mismatched INCORRECT! 20 22553 Matched C…	1	2017-06-05 16:35:36 UTC	2017-06-05 16:38:59 UTC	Mozilla/5.0 (Macintosh; Intel Mac OS X 10_12_4) AppleWebKit/603.1.30 (KHTML, like Gecko) Version/10.1 Safari/603.1.30	Safari	Mac OS X	Desktop
751	68639	1627	15099	852	37196	17	Attempted 12 Errors 4 Max 6 Score 17 CorrectScore 39	Task duration: 95088 OverallScore 17 Attempted 12 Errors 4 Max 6 Score 17 CorrectScore 39 TrialType Angle Feedback Score RT Match 90 CORRECT 4 6238 Mismatch 270 CORRECT 8 7542 Match 270 CORRECT 13 5405 Match 180 CORRECT 18 7395 Match 270 CORRECT 24 4160 Mismatch 270 INCORRECT! 18 4185 Match 180 INCORRECT! 12 7471 Mismatch 180 CORRECT 17 8005 Match 90 INCORRECT! 12 4534 Match 270 CORRECT 17 7375 M…	1	2017-06-05 16:34:15 UTC	2017-06-05 16:34:32 UTC	Mozilla/5.0 (Macintosh; Intel Mac OS X 10_12_4) AppleWebKit/603.1.30 (KHTML, like Gecko) Version/10.1 Safari/603.1.30	Safari	Mac OS X	Desktop
751	68639	1627	15097	854	37196	4	4	Task duration 107165 MaxScore 4 MeanScore 4 TargetString ResponseString RT Feedback 41312 41312 7323 CORRECT! 4111268 41112126 44304 INCORRECT! 121556 5629 9918 INCORRECT! 1109 11010 6250 INCORRECT!	1	2017-06-05 16:30:30 UTC	2017-06-05 16:32:55 UTC	Mozilla/5.0 (Macintosh; Intel Mac OS X 10_12_4) AppleWebKit/603.1.30 (KHTML, like Gecko) Version/10.1 Safari/603.1.30	Safari	Mac OS X	Desktop
751	68639	1627	15095	849	37196	-4	Attempted 24 Errors 14 Max 10 Score -4	Task duration 187252 OverallScore -4 Attempted 24 Errors 14 Max 10 Score -4 OddOneOut Selection Correct Level On Responded RT Score 8 8 CORRECT 1 19422 22758 3336 0 1 1 CORRECT 2 24051 37845 13794 1 6 6 CORRECT 3 39132 50174 11042 2 9 9 CORRECT 4 51466 60102 8636 3 4 5 ERROR!! 5 61418 68222 6804 4 4 5 ERROR!! 5 69632 78550 8918 3 8 8 CORRECT 7 79918 94247 14329 2 6 6 CORRECT 5 95648 103431 7783 3…	1	2017-06-05 16:22:59 UTC	2017-06-05 16:28:21 UTC	Mozilla/5.0 (Macintosh; Intel Mac OS X 10_12_4) AppleWebKit/603.1.30 (KHTML, like Gecko) Version/10.1 Safari/603.1.30	Safari	Mac OS X	Desktop
751	68639	1627	15093	845	37196	-1	CC trials 0.8888888888888888 IC trials 0.9 CI trials 0 II trials 0.1111111111111111 CC RT 2597.8888888888887 IC RT 1974.9 CI RT 1969.7777777777778 II RT 1973	Task duration = 95557 OverallScore -1 CC trials 0.8888888888888888 IC trials 0.9 CI trials 0 II trials 0.1111111111111111 CC RT 2597.8888888888887 IC RT 1974.9 CI RT 1969.7777777777778 II RT 1973 Problems CorrectAnswer ProbeText ProbeColour RightProbe LeftProbe ResponseChoice Feedback RT IIR Right RED 255 BLUE RED Right CORRECT 3466 CCL Left BLUE 255 RED BLUE Left CORRECT 3092 IIL Left RED 255 RE…	1	2017-06-05 16:22:12 UTC	2017-06-05 16:21:59 UTC	Mozilla/5.0 (Macintosh; Intel Mac OS X 10_12_4) AppleWebKit/603.1.30 (KHTML, like Gecko) Version/10.1 Safari/603.1.30	Safari	Mac OS X	Desktop
751	68639	1627	15091	847	37196	3		Task duration = 95543 3 out of 11 attempted ProbeText OuterImg InnerImg Response Feedback RT Circle is not contained by square Square Circle false INCORRECT! 11655 Circle is smaller than square Square Circle false CORRECT 14981 Circle does not contain square Square Circle false INCORRECT! 6189 Circle is smaller than square Square Circle true CORRECT 5576 Square encapsulates circle Square Circle t…	1	2017-06-05 16:17:15 UTC	2017-06-05 16:20:56 UTC	Mozilla/5.0 (Macintosh; Intel Mac OS X 10_12_4) AppleWebKit/603.1.30 (KHTML, like Gecko) Version/10.1 Safari/603.1.30	Safari	Mac OS X	Desktop
751	68639	1627	15089	848	37196	3	2.5	Task duration 66635 MaxScore 3 MeanScore 2.5 TargetString ResponseString RT Feedback 2114 1421 14876 INCORRECT! 235 523 4847 INCORRECT! 227 227 6259 CORRECT! 241922 241922 7897 CORRECT! 1522311 1523211 9628 INCORRECT!	1	2017-06-05 16:16:54 UTC	2017-06-05 16:17:41 UTC	Mozilla/5.0 (Macintosh; Intel Mac OS X 10_12_4) AppleWebKit/603.1.30 (KHTML, like Gecko) Version/10.1 Safari/603.1.30	Safari	Mac OS X	Desktop
751	68513	1627	15111	853	37098	0	0	Task duration 27542 AvgCorrect 0 MaxScore 0 23.gif 1069 Response 1 of 2 Empty 22.gif 1066 Token 1 of 4 1.gif 1971 Response 1 of 3 Empty 9.gif 436 Response 2 of 3 Empty 22.gif 3740 Response 3 of 3 Found ERROR! 4.gif 1069 Response 1 of 2 Empty 10.gif 288 Token 1 of 3 17.gif 1141 Token 2 of 3 10.gif 1625 Response 1 of 1 Found ERROR! 8.gif 1115 Token 1 of 2 8.gif 1666 Response 1 of 1 Found ERROR!	1	2017-05-29 19:24:09 UTC	2017-05-29 19:26:12 UTC	Mozilla/5.0 (Macintosh; Intel Mac OS X 10_12_4) AppleWebKit/603.1.30 (KHTML, like Gecko) Version/10.1 Safari/603.1.30	Safari	Mac OS X	Desktop
751	68513	1627	15109	851	37098	-12	Attempted 41 Errors 25 Max 3 Score -12 CorrectScore 21	Task duration 95733 OverallScore -12 Attempted 41 Errors 25 Max 3 Score -12 CorrectScore 21 TypeOfTrial ShapeTypeRight ShapeTypeLeft CopyingWhichSide Feedback CurrentScore RT Match 6 6 Right INCORRECT! -1 4964 Match 3 3 Right CORRECT 0 3537 Match 6 4 Right CORRECT 1 3376 Mismatch 5 3 Right CORRECT 3 2131 Mismatch 3 6 Right INCORRECT! 1 3967 Match 6 4 Right INCORRECT! -1 2874 Mismatch 5 4 Left INC…	1	2017-05-29 19:23:18 UTC	2017-05-29 19:24:50 UTC	Mozilla/5.0 (Macintosh; Intel Mac OS X 10_12_4) AppleWebKit/603.1.30 (KHTML, like Gecko) Version/10.1 Safari/603.1.30	Safari	Mac OS X	Desktop
751	68513	1627	15107	850	37098	3	2.5	Task duration 89744 MaxScore: 3 MeanScore 2.5 TargetString ResponseString RT Feedback 2420 20 330 Incorrect 31 1 29821 Incorrect 17 17 6174 Correct 15512 15512 5878 Correct 18221416 1814 2619 Incorrect	1	2017-05-29 19:20:49 UTC	2017-05-29 19:22:01 UTC	Mozilla/5.0 (Macintosh; Intel Mac OS X 10_12_4) AppleWebKit/603.1.30 (KHTML, like Gecko) Version/10.1 Safari/603.1.30	Safari	Mac OS X	Desktop
751	68513	1627	15105	855	37098	17	17	Task duration 187496 Batch: Song: OverallScore 17 DifficultyLevel Feedback MovesMade RT 1 CORRECT! 3 17252 2 CORRECT! 3 15748 3 Failed! 8 49618 2 CORRECT! 3 12076 3 CORRECT! 4 24389 4 CORRECT! 4 12663 5 Failed! 10 39217	1	2017-05-29 19:16:32 UTC	2017-05-29 19:18:41 UTC	Mozilla/5.0 (Macintosh; Intel Mac OS X 10_12_4) AppleWebKit/603.1.30 (KHTML, like Gecko) Version/10.1 Safari/603.1.30	Safari	Mac OS X	Desktop
751	68513	1627	15103	844	37098	5	4.66667	Task duration 92773 MaxScore 5 MeanScore 4.666666666666667 TargetString ResponseString RT Feedback 8106 8106 4487 CORRECT! 69251 69251 4155 CORRECT! 157043 654371 9618 INCORRECT! 52680 52680 5121 CORRECT! 782693 000000 20452 INCORRECT! 35076 35706 4905 INCORRECT!	1	2017-05-29 19:14:16 UTC	2017-05-29 19:15:54 UTC	Mozilla/5.0 (Macintosh; Intel Mac OS X 10_12_4) AppleWebKit/603.1.30 (KHTML, like Gecko) Version/10.1 Safari/603.1.30	Safari	Mac OS X	Desktop
751	68513	1627	15101	846	37098	35	Attempted 23 Errors 6 Max 8 Score 35 CorrectScore 79	Task duration 95692 OverallScore 35 Attempted 23 Errors 6 Max 8 Score 35 CorrectScore 79 TrialType FeedbackText.text CurrentScore RT Matched CORRECT 1 2353 Mismatched CORRECT 2 1803 Matched CORRECT 4 3335 Mismatched CORRECT 6 1654 Mismatched CORRECT 9 4119 Matched CORRECT 12 4467 Matched CORRECT 16 3222 Matched CORRECT 20 3343 Mismatched INCORRECT! 15 3790 Matched CORRECT 20 4771 Mismatched CORRE…	1	2017-05-29 19:09:31 UTC	2017-05-29 19:11:35 UTC	Mozilla/5.0 (Macintosh; Intel Mac OS X 10_12_4) AppleWebKit/603.1.30 (KHTML, like Gecko) Version/10.1 Safari/603.1.30	Safari	Mac OS X	Desktop
751	68513	1627	15099	852	37098	-11	Attempted 19 Errors 10 Max 5 Score -11 CorrectScore 33	Task duration: 95439 OverallScore -11 Attempted 19 Errors 10 Max 5 Score -11 CorrectScore 33 TrialType Angle Feedback Score RT Mismatch 180 CORRECT 4 4958 Match 90 CORRECT 8 3803 Match 180 INCORRECT! 3 3637 Mismatch 180 INCORRECT! -2 5385 Mismatch 180 INCORRECT! -6 3829 Match 90 INCORRECT! -10 2440 Mismatch 90 CORRECT -7 4848 Mismatch 90 CORRECT -4 2984 Mismatch 270 CORRECT 0 5148 Mismatch 180 CO…	1	2017-05-29 19:06:12 UTC	2017-05-29 19:09:24 UTC	Mozilla/5.0 (Macintosh; Intel Mac OS X 10_12_4) AppleWebKit/603.1.30 (KHTML, like Gecko) Version/10.1 Safari/603.1.30	Safari	Mac OS X	Desktop
751	68513	1627	15097	854	37098	5	4.5	Task duration 79957 MaxScore 5 MeanScore 4.5 TargetString ResponseString RT Feedback 14296 14296 5214 CORRECT! 1071528 1071528 4456 CORRECT! 5141110415 571411415 7733 INCORRECT! 15134113 15134311 6297 INCORRECT! 211101 211110 3719 INCORRECT!	1	2017-05-29 19:04:07 UTC	2017-05-29 19:05:31 UTC	Mozilla/5.0 (Macintosh; Intel Mac OS X 10_12_4) AppleWebKit/603.1.30 (KHTML, like Gecko) Version/10.1 Safari/603.1.30	Safari	Mac OS X	Desktop
751	68513	1627	15095	849	37098	-21	Attempted 49 Errors 35 Max 14 Score -21	Task duration 187467 OverallScore -21 Attempted 49 Errors 35 Max 14 Score -21 OddOneOut Selection Correct Level On Responded RT Score 9 9 CORRECT 1 8106 9778 1672 0 6 6 CORRECT 2 11103 16538 5435 1 1 1 CORRECT 3 17898 21906 4008 2 7 7 CORRECT 4 23270 28098 4828 3 2 1 ERROR!! 5 29404 33051 3647 4 1 7 ERROR!! 5 34350 40003 5653 3 3 3 CORRECT 6 41312 43772 2460 2 5 2 ERROR!! 6 45068 49347 4279 3 7 6…	1	2017-05-29 19:01:37 UTC	2017-05-29 19:04:51 UTC	Mozilla/5.0 (Macintosh; Intel Mac OS X 10_12_4) AppleWebKit/603.1.30 (KHTML, like Gecko) Version/10.1 Safari/603.1.30	Safari	Mac OS X	Desktop
751	68513	1627	15093	845	37098	5	CC trials 1 IC trials 0.5555555555555556 CI trials 0.5555555555555556 II trials 0.1111111111111111 CC RT 1342.5 IC RT 2834.5555555555557 CI RT 2270.8888888888887 II RT 2338.1111111111113	Task duration = 95691 OverallScore 5 CC trials 1 IC trials 0.5555555555555556 CI trials 0.5555555555555556 II trials 0.1111111111111111 CC RT 1342.5 IC RT 2834.5555555555557 CI RT 2270.8888888888887 II RT 2338.1111111111113 Problems CorrectAnswer ProbeText ProbeColour RightProbe LeftProbe ResponseChoice Feedback RT IIR Right BLUE 16711680 RED BLUE Right CORRECT 3311 CIL Left RED 16711680 BLUE RED…	1	2017-05-29 18:57:43 UTC	2017-05-29 18:57:54 UTC	Mozilla/5.0 (Macintosh; Intel Mac OS X 10_12_4) AppleWebKit/603.1.30 (KHTML, like Gecko) Version/10.1 Safari/603.1.30	Safari	Mac OS X	Desktop
751	68513	1627	15091	847	37098	3		Task duration = 95577 3 out of 17 attempted ProbeText OuterImg InnerImg Response Feedback RT Circle does not contain square Square Circle true CORRECT 6410 Square encapsulates circle Square Circle false INCORRECT! 3438 Circle encapsulates square Square Circle true INCORRECT! 1811 Square is encapsulated by circle Square Circle true CORRECT 5136 Circle is bigger than square Square Circle true CORRE…	1	2017-05-29 18:53:24 UTC	2017-05-29 18:55:06 UTC	Mozilla/5.0 (Macintosh; Intel Mac OS X 10_12_4) AppleWebKit/603.1.30 (KHTML, like Gecko) Version/10.1 Safari/603.1.30	Safari	Mac OS X	Desktop
751	68513	1627	15089	848	37098	5	3.8	Task duration 74797 MaxScore 5 MeanScore 3.8 TargetString ResponseString RT Feedback 2012 1220 2472 INCORRECT! 518 518 1962 CORRECT! 23120 23120 2883 CORRECT! 2341615 2341615 3865 CORRECT! 2439112 2439112 4139 CORRECT! 722022415 722215204 4437 INCORRECT! 222102021 222102021 3682 CORRECT! 2191751318 2191751813 4938 INCORRECT!	1	2017-05-29 18:51:28 UTC	2017-05-29 18:52:50 UTC	Mozilla/5.0 (Macintosh; Intel Mac OS X 10_12_4) AppleWebKit/603.1.30 (KHTML, like Gecko) Version/10.1 Safari/603.1.30	Safari	Mac OS X	Desktop
751	68520	1627	15111	853	37097	4	4	Task duration 78936 AvgCorrect 4 MaxScore 4 18.gif 13473 Response 1 of 4 Empty 11.gif 1395 Response 2 of 4 Empty 5.gif 2660 Response 3 of 4 Empty 9.gif 4019 Token 1 of 4 18.gif 4097 Token 2 of 4 11.gif 2479 Token 3 of 4 5.gif 1657 Token 4 of 4 completed 14.gif 2810 Response 1 of 4 Empty 24.gif 2937 Response 2 of 4 Empty 19.gif 1842 Response 3 of 4 Empty 22.gif 1454 Token 1 of 5 14.gif 1200 Respon…	1	2017-05-29 18:33:01 UTC	2017-05-29 18:36:16 UTC	Mozilla/5.0 (Macintosh; Intel Mac OS X 10_12_4) AppleWebKit/603.1.30 (KHTML, like Gecko) Version/10.1 Safari/603.1.30	Safari	Mac OS X	Desktop
751	68520	1627	15109	851	37097	-6	Attempted 15 Errors 7 Max 3 Score -6 CorrectScore 16	Task duration 95439 OverallScore -6 Attempted 15 Errors 7 Max 3 Score -6 CorrectScore 16 TypeOfTrial ShapeTypeRight ShapeTypeLeft CopyingWhichSide Feedback CurrentScore RT Match 5 6 Left CORRECT 1 6230 Match 6 4 Left CORRECT 2 3470 Match 5 3 Right INCORRECT! 0 4671 Match 4 5 Left CORRECT 2 3907 Match 6 6 Right CORRECT 4 4197 Mismatch 3 5 Left CORRECT 7 2873 Match 5 5 Left CORRECT 10 6796 Mismatch…	1	2017-05-29 18:31:44 UTC	2017-05-29 18:32:49 UTC	Mozilla/5.0 (Macintosh; Intel Mac OS X 10_12_4) AppleWebKit/603.1.30 (KHTML, like Gecko) Version/10.1 Safari/603.1.30	Safari	Mac OS X	Desktop
751	68520	1627	15107	850	37097	3	2.33333	Task duration 95620 MaxScore: 3 MeanScore 2.3333333333333335 TargetString ResponseString RT Feedback 234 234 11986 Correct 3120 20 3721 Incorrect 217 17 4305 Incorrect 613 613 8973 Correct 1166 1166 7482 Correct 171185 8 5500 Incorrect	1	2017-05-29 18:29:37 UTC	2017-05-29 18:31:42 UTC	Mozilla/5.0 (Macintosh; Intel Mac OS X 10_12_4) AppleWebKit/603.1.30 (KHTML, like Gecko) Version/10.1 Safari/603.1.30	Safari	Mac OS X	Desktop
751	68520	1627	15105	855	37097	0	0	Task duration 187289 Batch: Song: OverallScore 0 DifficultyLevel Feedback MovesMade RT 1 Failed! 6 59164 1 Failed! 6 62902	1	2017-05-29 18:25:32 UTC	2017-05-29 18:29:19 UTC	Mozilla/5.0 (Macintosh; Intel Mac OS X 10_12_4) AppleWebKit/603.1.30 (KHTML, like Gecko) Version/10.1 Safari/603.1.30	Safari	Mac OS X	Desktop
751	68520	1627	15103	844	37097	6	4.5	Task duration 105647 MaxScore 6 MeanScore 4.5 TargetString ResponseString RT Feedback 7103 4870 18104 INCORRECT! 195 195 4124 CORRECT! 6529 6529 4602 CORRECT! 16837 16837 5571 CORRECT! 513920 513920 6319 CORRECT! 3851297 3829173 11038 INCORRECT! 829501 829510 5984 INCORRECT!	1	2017-05-29 18:22:21 UTC	2017-05-29 18:24:50 UTC	Mozilla/5.0 (Macintosh; Intel Mac OS X 10_12_4) AppleWebKit/603.1.30 (KHTML, like Gecko) Version/10.1 Safari/603.1.30	Safari	Mac OS X	Desktop
751	68520	1627	15101	846	37097	36	Attempted 13 Errors 1 Max 6 Score 36 CorrectScore 42	Task duration 95675 OverallScore 36 Attempted 13 Errors 1 Max 6 Score 36 CorrectScore 42 TrialType FeedbackText.text CurrentScore RT Mismatched CORRECT 1 3698 Matched CORRECT 2 2830 Matched CORRECT 4 2809 Matched CORRECT 6 3697 Matched CORRECT 9 5335 Mismatched CORRECT 12 2962 Mismatched CORRECT 16 5988 Matched CORRECT 20 9237 Matched CORRECT 25 8404 Matched CORRECT 30 9448 Mismatched INCORRECT! …	1	2017-05-29 18:20:23 UTC	2017-05-29 18:21:55 UTC	Mozilla/5.0 (Macintosh; Intel Mac OS X 10_12_4) AppleWebKit/603.1.30 (KHTML, like Gecko) Version/10.1 Safari/603.1.30	Safari	Mac OS X	Desktop
751	68520	1627	15099	852	37097	23	Attempted 9 Errors 2 Max 6 Score 23 CorrectScore 36	Task duration: 95514 OverallScore 23 Attempted 9 Errors 2 Max 6 Score 23 CorrectScore 36 TrialType Angle Feedback Score RT Match 270 CORRECT 4 9321 Mismatch 90 CORRECT 8 3538 Match 180 CORRECT 13 7738 Match 90 CORRECT 18 13758 Mismatch 90 CORRECT 24 13127 Match 90 INCORRECT! 18 10600 Mismatch 180 CORRECT 24 4894 Mismatch 270 CORRECT 30 8551 Match 90 INCORRECT! 23 9064	1	2017-05-29 18:17:27 UTC	2017-05-29 18:19:47 UTC	Mozilla/5.0 (Macintosh; Intel Mac OS X 10_12_4) AppleWebKit/603.1.30 (KHTML, like Gecko) Version/10.1 Safari/603.1.30	Safari	Mac OS X	Desktop
751	68520	1627	15097	854	37097	4	4	Task duration 133597 MaxScore 4 MeanScore 4 TargetString ResponseString RT Feedback 148155 148155 5401 CORRECT! 6101571 6610151 10419 INCORRECT! 0143 0143 7734 CORRECT! 514782 147152 24101 INCORRECT! 715125 715125 7314 CORRECT! 03131215 0131502 17790 INCORRECT!	1	2017-05-29 18:14:26 UTC	2017-05-29 18:17:04 UTC	Mozilla/5.0 (Macintosh; Intel Mac OS X 10_12_4) AppleWebKit/603.1.30 (KHTML, like Gecko) Version/10.1 Safari/603.1.30	Safari	Mac OS X	Desktop
751	68520	1627	15095	849	37097	7	Attempted 17 Errors 5 Max 12 Score 7	Task duration 186948 OverallScore 7 Attempted 17 Errors 5 Max 12 Score 7 OddOneOut Selection Correct Level On Responded RT Score 1 1 CORRECT 1 24026 33034 9008 0 3 3 CORRECT 2 34413 41354 6941 1 6 6 CORRECT 3 42661 53035 10374 2 3 3 CORRECT 4 54412 57171 2759 3 4 4 CORRECT 6 58446 65203 6757 4 5 5 CORRECT 5 66494 69747 3253 5 2 3 ERROR!! 7 71115 86964 15849 6 9 9 CORRECT 8 88245 105421 17176 5 6 …	1	2017-05-29 18:10:38 UTC	2017-05-29 18:14:06 UTC	Mozilla/5.0 (Macintosh; Intel Mac OS X 10_12_4) AppleWebKit/603.1.30 (KHTML, like Gecko) Version/10.1 Safari/603.1.30	Safari	Mac OS X	Desktop
751	68520	1627	15093	845	37097	-8	CC trials 1 IC trials 0 CI trials 0.625 II trials 0 CC RT 1699.7777777777778 IC RT 2358.4444444444443 CI RT 2983.75 II RT 2045.1	Task duration = 95737 OverallScore -8 CC trials 1 IC trials 0 CI trials 0.625 II trials 0 CC RT 1699.7777777777778 IC RT 2358.4444444444443 CI RT 2983.75 II RT 2045.1 Problems CorrectAnswer ProbeText ProbeColour RightProbe LeftProbe ResponseChoice Feedback RT CIL Left BLUE 255 RED BLUE Left CORRECT 6558 IIR Right RED 255 BLUE RED Left INCORRECT! 2694 CCL Left RED 16711680 BLUE RED Left CORRECT 25…	1	2017-05-29 18:07:42 UTC	2017-05-29 18:09:54 UTC	Mozilla/5.0 (Macintosh; Intel Mac OS X 10_12_4) AppleWebKit/603.1.30 (KHTML, like Gecko) Version/10.1 Safari/603.1.30	Safari	Mac OS X	Desktop
751	68520	1627	15091	847	37097	10		Task duration = 95703 10 out of 14 attempted ProbeText OuterImg InnerImg Response Feedback RT Square is bigger than circle Square Circle true CORRECT 3955 Square is contained by circle Square Circle false CORRECT 4591 Square is not bigger than circle Square Circle true CORRECT 5291 Circle is not bigger than square Square Circle false CORRECT 4946 Circle is bigger than square Square Circle true CO…	1	2017-05-29 18:03:21 UTC	2017-05-29 18:04:02 UTC	Mozilla/5.0 (Macintosh; Intel Mac OS X 10_12_4) AppleWebKit/603.1.30 (KHTML, like Gecko) Version/10.1 Safari/603.1.30	Safari	Mac OS X	Desktop
751	68520	1627	15089	848	37097	6	4.16667	Task duration 125801 MaxScore 6 MeanScore 4.166666666666667 TargetString ResponseString RT Feedback 69 69 4628 CORRECT! 132225 132225 4257 CORRECT! 239197 239197 7650 CORRECT! 25148511 25148511 7982 CORRECT! 2242011723 2242011723 9392 CORRECT! 3511212246 5361122421 11609 INCORRECT! 14212415238 14212324158 7685 INCORRECT! 2321278 2321278 5937 CORRECT! 136118215 136811215 8273 INCORRECT!	2	2017-05-29 17:59:11 UTC	2017-05-29 18:02:01 UTC	Mozilla/5.0 (Macintosh; Intel Mac OS X 10_12_4) AppleWebKit/603.1.30 (KHTML, like Gecko) Version/10.1 Safari/603.1.30	Safari	Mac OS X	Desktop
751	68520	1627	15111	853	37040	2	2	Task duration 56808 AvgCorrect 2 MaxScore 2 19.gif 12941 Response 1 of 4 Empty 8.gif 3970 Response 2 of 4 Empty 11.gif 1344 Response 3 of 4 Empty 18.gif 805 Token 1 of 4 19.gif 1726 Token 2 of 4 18.gif 2868 Response 1 of 1 Found ERROR! 17.gif 3190 Response 1 of 2 Empty 7.gif 1736 Token 1 of 3 3.gif 1373 Token 2 of 3 7.gif 910 Response 1 of 1 Found ERROR! 22.gif 1293 Token 1 of 2 19.gif 1712 Token…	1	2017-05-24 20:40:44 UTC	2017-05-24 20:42:57 UTC	Mozilla/5.0 (Macintosh; Intel Mac OS X 10_12_3) AppleWebKit/602.4.8 (KHTML, like Gecko) Version/10.0.3 Safari/602.4.8	Safari	Mac OS X	Desktop
751	68520	1627	15109	851	37040	10	Attempted 25 Errors 12 Max 4 Score 10 CorrectScore 24	Task duration 95689 OverallScore 10 Attempted 25 Errors 12 Max 4 Score 10 CorrectScore 24 TypeOfTrial ShapeTypeRight ShapeTypeLeft CopyingWhichSide Feedback CurrentScore RT Match 5 4 Left INCORRECT! -1 3461 Mismatch 6 6 Left INCORRECT! -2 5378 Match 4 4 Left CORRECT -1 2695 Mismatch 3 3 Left INCORRECT! -2 4112 Match 6 4 Left INCORRECT! -3 2826 Mismatch 5 5 Left CORRECT -2 1186 Match 3 3 Left INCO…	1	2017-05-24 20:39:43 UTC	2017-05-24 20:41:16 UTC	Mozilla/5.0 (Macintosh; Intel Mac OS X 10_12_3) AppleWebKit/602.4.8 (KHTML, like Gecko) Version/10.0.3 Safari/602.4.8	Safari	Mac OS X	Desktop
751	68520	1627	15107	850	37040	4	3	Task duration 125299 MaxScore: 4 MeanScore 3 TargetString ResponseString RT Feedback 67 67 5012 Correct 17159 17159 8405 Correct 5231316 5231316 12007 Correct 419132310 410 7273 Incorrect 128217 8 5031 Incorrect 171110 171110 9195 Correct 13101424 1314 4862 Incorrect	1	2017-05-24 20:36:35 UTC	2017-05-24 20:38:29 UTC	Mozilla/5.0 (Macintosh; Intel Mac OS X 10_12_3) AppleWebKit/602.4.8 (KHTML, like Gecko) Version/10.0.3 Safari/602.4.8	Safari	Mac OS X	Desktop
751	68520	1627	15105	855	37040	3	3	Task duration 187195 Batch: Song: OverallScore 3 DifficultyLevel Feedback MovesMade RT 1 CORRECT! 3 67180 2 Failed! 6 36592 1 Failed! 6 22209	1	2017-05-24 20:32:33 UTC	2017-05-24 20:35:50 UTC	Mozilla/5.0 (Macintosh; Intel Mac OS X 10_12_3) AppleWebKit/602.4.8 (KHTML, like Gecko) Version/10.0.3 Safari/602.4.8	Safari	Mac OS X	Desktop
751	68520	1627	15103	844	37040	5	4.5	Task duration 105871 MaxScore 5 MeanScore 4.5 TargetString ResponseString RT Feedback 6870 6870 5453 CORRECT! 20748 20478 5821 INCORRECT! 4610 4610 5236 CORRECT! 76493 76493 5520 CORRECT! 296583 296853 8237 INCORRECT! 80512 80512 8654 CORRECT! 042187 805726 16817 INCORRECT!	1	2017-05-24 20:29:06 UTC	2017-05-24 20:30:38 UTC	Mozilla/5.0 (Macintosh; Intel Mac OS X 10_12_3) AppleWebKit/602.4.8 (KHTML, like Gecko) Version/10.0.3 Safari/602.4.8	Safari	Mac OS X	Desktop
751	68520	1627	15101	846	37040	64	Attempted 15 Errors 0 Max 8 Score 64 CorrectScore 64	Task duration 95601 OverallScore 64 Attempted 15 Errors 0 Max 8 Score 64 CorrectScore 64 TrialType FeedbackText.text CurrentScore RT Mismatched CORRECT 1 3335 Matched CORRECT 2 2633 Mismatched CORRECT 4 3280 Mismatched CORRECT 6 2059 Matched CORRECT 9 2318 Mismatched CORRECT 12 4157 Mismatched CORRECT 16 2232 Mismatched CORRECT 20 3511 Matched CORRECT 25 9375 Mismatched CORRECT 30 5292 Mismatched…	1	2017-05-24 20:23:54 UTC	2017-05-24 20:26:42 UTC	Mozilla/5.0 (Macintosh; Intel Mac OS X 10_12_3) AppleWebKit/602.4.8 (KHTML, like Gecko) Version/10.0.3 Safari/602.4.8	Safari	Mac OS X	Desktop
751	68520	1627	15099	852	37040	-1	Attempted 19 Errors 9 Max 5 Score -1 CorrectScore 37	Task duration: 95844 OverallScore -1 Attempted 19 Errors 9 Max 5 Score -1 CorrectScore 37 TrialType Angle Feedback Score RT Mismatch 180 INCORRECT! -4 6901 Match 180 INCORRECT! -8 6254 Match 90 CORRECT -5 2806 Match 90 CORRECT -2 3209 Match 270 CORRECT 2 4287 Mismatch 90 CORRECT 6 5127 Match 90 INCORRECT! 1 2687 Mismatch 270 INCORRECT! -4 4602 Mismatch 180 INCORRECT! -8 1660 Mismatch 180 CORRECT …	1	2017-05-24 20:21:40 UTC	2017-05-24 20:23:20 UTC	Mozilla/5.0 (Macintosh; Intel Mac OS X 10_12_3) AppleWebKit/602.4.8 (KHTML, like Gecko) Version/10.0.3 Safari/602.4.8	Safari	Mac OS X	Desktop
751	68520	1627	15097	854	37040	4	4	Task duration 95747 MaxScore 4 MeanScore 4 TargetString ResponseString RT Feedback 148112 148112 4506 CORRECT! 271113 27137 5305 INCORRECT! 141532 141532 4027 CORRECT! 1141217 741282 5989 INCORRECT! 5924 5924 7165 CORRECT! 561402 562130 7962 INCORRECT!	1	2017-05-24 20:17:37 UTC	2017-05-24 20:19:18 UTC	Mozilla/5.0 (Macintosh; Intel Mac OS X 10_12_3) AppleWebKit/602.4.8 (KHTML, like Gecko) Version/10.0.3 Safari/602.4.8	Safari	Mac OS X	Desktop
751	68520	1627	15095	849	37040	9	Attempted 21 Errors 6 Max 15 Score 9	Task duration 187081 OverallScore 9 Attempted 21 Errors 6 Max 15 Score 9 OddOneOut Selection Correct Level On Responded RT Score 5 5 CORRECT 1 6937 15222 8285 0 9 9 CORRECT 2 16577 20310 3733 1 8 8 CORRECT 3 21684 27614 5930 2 7 7 CORRECT 4 28899 31726 2827 3 4 4 CORRECT 7 33016 35838 2822 4 3 3 CORRECT 5 37153 40294 3141 5 1 2 ERROR!! 7 41564 46191 4627 6 8 6 ERROR!! 7 47515 51719 4204 5 2 8 ERR…	1	2017-05-24 20:13:23 UTC	2017-05-24 20:17:27 UTC	Mozilla/5.0 (Macintosh; Intel Mac OS X 10_12_3) AppleWebKit/602.4.8 (KHTML, like Gecko) Version/10.0.3 Safari/602.4.8	Safari	Mac OS X	Desktop
751	68520	1627	15093	845	37040	1	CC trials 0.75 IC trials 1 CI trials 0.4 II trials 0 CC RT 4122.25 IC RT 4504 CI RT 6717 II RT 4365.5	Task duration = 95410 OverallScore 1 CC trials 0.75 IC trials 1 CI trials 0.4 II trials 0 CC RT 4122.25 IC RT 4504 CI RT 6717 II RT 4365.5 Problems CorrectAnswer ProbeText ProbeColour RightProbe LeftProbe ResponseChoice Feedback RT CIL Left BLUE 255 RED BLUE Right INCORRECT! 11474 ICL Left BLUE 16711680 BLUE RED Left CORRECT 6478 CIR Right BLUE 255 BLUE RED Left INCORRECT! 7106 IIR Right RED 255 …	2	2017-05-24 20:10:42 UTC	2017-05-24 20:12:19 UTC	Mozilla/5.0 (Macintosh; Intel Mac OS X 10_12_3) AppleWebKit/602.4.8 (KHTML, like Gecko) Version/10.0.3 Safari/602.4.8	Safari	Mac OS X	Desktop
751	68520	1627	15091	847	37040	5		Task duration = 95683 5 out of 13 attempted ProbeText OuterImg InnerImg Response Feedback RT Circle is contained by square Square Circle false CORRECT 8407 Circle is not bigger than square Square Circle false CORRECT 7090 Circle is not encapsulated by square Square Circle true INCORRECT! 4715 Circle is bigger than square Square Circle true INCORRECT! 4897 Circle is not contained by square Square …	1	2017-05-24 20:07:14 UTC	2017-05-24 20:10:07 UTC	Mozilla/5.0 (Macintosh; Intel Mac OS X 10_12_3) AppleWebKit/602.4.8 (KHTML, like Gecko) Version/10.0.3 Safari/602.4.8	Safari	Mac OS X	Desktop
751	68520	1627	15089	848	37040	5	3.83333	Task duration 117279 MaxScore 5 MeanScore 3.8333333333333335 TargetString ResponseString RT Feedback 1516 1516 4197 CORRECT! 20321 20321 7591 CORRECT! 1222818 1222818 4830 CORRECT! 231121126 211123126 10138 INCORRECT! 1210119 1210119 7430 CORRECT! 2313191520 2313191520 7337 CORRECT! 51517218 51587121 7223 INCORRECT! 161132412 161132412 7078 CORRECT! 1712221519 1712221195 6973 INCORRECT!	1	2017-05-24 20:04:42 UTC	2017-05-24 20:06:46 UTC	Mozilla/5.0 (Macintosh; Intel Mac OS X 10_12_3) AppleWebKit/602.4.8 (KHTML, like Gecko) Version/10.0.3 Safari/602.4.8	Safari	Mac OS X	Desktop
751	68513	1627	15111	853	37022	2	2	Task duration 34937 AvgCorrect 2 MaxScore 2 23.gif 2219 Response 1 of 3 Empty 5.gif 1497 Response 2 of 3 Empty 1.gif 862 Token 1 of 4 16.gif 1976 Response 1 of 2 Empty 1.gif 1978 Response 2 of 2 Found ERROR! 25.gif 1666 Response 1 of 2 Empty 22.gif 1114 Token 1 of 3 22.gif 1817 Response 1 of 1 Found ERROR! 11.gif 1549 Token 1 of 2 25.gif 1912 Token 2 of 2 completed 9.gif 1678 Response 1 of 2 Empt…	1	2017-05-23 20:12:56 UTC	2017-05-23 20:12:30 UTC	Mozilla/5.0 (Macintosh; Intel Mac OS X 10_12_3) AppleWebKit/602.4.8 (KHTML, like Gecko) Version/10.0.3 Safari/602.4.8	Safari	Mac OS X	Desktop
751	68513	1627	15109	851	37022	1	Attempted 20 Errors 9 Max 4 Score 1 CorrectScore 23	Task duration 95838 OverallScore 1 Attempted 20 Errors 9 Max 4 Score 1 CorrectScore 23 TypeOfTrial ShapeTypeRight ShapeTypeLeft CopyingWhichSide Feedback CurrentScore RT Match 3 6 Left CORRECT 1 6872 Mismatch 5 4 Right CORRECT 2 7191 Mismatch 6 4 Right INCORRECT! 0 2974 Match 4 6 Right INCORRECT! -2 2826 Match 4 6 Left INCORRECT! -3 3995 Match 5 3 Right CORRECT -2 2369 Mismatch 6 4 Left INCORRECT…	1	2017-05-23 20:09:08 UTC	2017-05-23 20:11:52 UTC	Mozilla/5.0 (Macintosh; Intel Mac OS X 10_12_3) AppleWebKit/602.4.8 (KHTML, like Gecko) Version/10.0.3 Safari/602.4.8	Safari	Mac OS X	Desktop
751	68513	1627	15107	850	37022	3	2.33333	Task duration 95124 MaxScore: 3 MeanScore 2.3333333333333335 TargetString ResponseString RT Feedback 1319 1319 4894 Correct 14522 5 3451 Incorrect 1923 1923 3720 Correct 101223 101223 5438 Correct 22231013 23 6389 Incorrect 32310 310 15837 Incorrect	1	2017-05-23 20:07:19 UTC	2017-05-23 20:09:03 UTC	Mozilla/5.0 (Macintosh; Intel Mac OS X 10_12_3) AppleWebKit/602.4.8 (KHTML, like Gecko) Version/10.0.3 Safari/602.4.8	Safari	Mac OS X	Desktop
751	68513	1627	15105	855	37022	14	14	Task duration 187415 Batch: Song: OverallScore 14 DifficultyLevel Feedback MovesMade RT 1 CORRECT! 3 24746 2 CORRECT! 3 21002 3 CORRECT! 4 19882 4 CORRECT! 4 25946	1	2017-05-23 20:02:05 UTC	2017-05-23 20:04:11 UTC	Mozilla/5.0 (Macintosh; Intel Mac OS X 10_12_3) AppleWebKit/602.4.8 (KHTML, like Gecko) Version/10.0.3 Safari/602.4.8	Safari	Mac OS X	Desktop
751	68513	1627	15103	844	37022	4	3.5	Task duration 73359 MaxScore 4 MeanScore 3.5 TargetString ResponseString RT Feedback 1726 2468 14124 INCORRECT! 496 496 4988 CORRECT! 4376 4376 5623 CORRECT! 35142 35412 5956 INCORRECT! 8472 8473 10154 INCORRECT!	1	2017-05-23 19:56:28 UTC	2017-05-23 19:58:58 UTC	Mozilla/5.0 (Macintosh; Intel Mac OS X 10_12_3) AppleWebKit/602.4.8 (KHTML, like Gecko) Version/10.0.3 Safari/602.4.8	Safari	Mac OS X	Desktop
751	68513	1627	15101	846	37022	23	Attempted 14 Errors 3 Max 5 Score 23 CorrectScore 33	Task duration 95319 OverallScore 23 Attempted 14 Errors 3 Max 5 Score 23 CorrectScore 33 TrialType FeedbackText.text CurrentScore RT Mismatched INCORRECT! -1 6511 Matched CORRECT 0 2968 Matched CORRECT 1 4389 Mismatched CORRECT 3 4300 Matched CORRECT 5 2092 Matched CORRECT 8 6660 Mismatched INCORRECT! 5 2849 Matched CORRECT 8 5154 Matched CORRECT 11 1996 Matched CORRECT 15 5330 Mismatched CORRECT…	1	2017-05-23 19:53:17 UTC	2017-05-23 19:56:00 UTC	Mozilla/5.0 (Macintosh; Intel Mac OS X 10_12_3) AppleWebKit/602.4.8 (KHTML, like Gecko) Version/10.0.3 Safari/602.4.8	Safari	Mac OS X	Desktop
751	68513	1627	15099	852	37022	-3	Attempted 14 Errors 7 Max 4 Score -3 CorrectScore 26	Task duration: 95403 OverallScore -3 Attempted 14 Errors 7 Max 4 Score -3 CorrectScore 26 TrialType Angle Feedback Score RT Mismatch 180 CORRECT 4 10410 Match 180 INCORRECT! 0 6432 Mismatch 90 CORRECT 4 8823 Match 270 CORRECT 8 11604 Mismatch 270 INCORRECT! 3 6964 Match 180 INCORRECT! -2 2184 Mismatch 180 INCORRECT! -6 8949 Mismatch 90 CORRECT -2 1196 Match 180 INCORRECT! -6 8814 Match 90 INCORRE…	1	2017-05-23 19:52:15 UTC	2017-05-23 19:52:55 UTC	Mozilla/5.0 (Macintosh; Intel Mac OS X 10_12_3) AppleWebKit/602.4.8 (KHTML, like Gecko) Version/10.0.3 Safari/602.4.8	Safari	Mac OS X	Desktop
751	68513	1627	15097	854	37022	4	3.33333	Task duration 96847 MaxScore 4 MeanScore 3.3333333333333335 TargetString ResponseString RT Feedback 815131 81419 5608 INCORRECT! 41510 41510 3419 CORRECT! 210012 21008 4803 INCORRECT! 1117 1117 3766 CORRECT! 114614 114614 5266 CORRECT! 6414157 4613157 17408 INCORRECT!	1	2017-05-23 19:49:58 UTC	2017-05-23 19:51:46 UTC	Mozilla/5.0 (Macintosh; Intel Mac OS X 10_12_3) AppleWebKit/602.4.8 (KHTML, like Gecko) Version/10.0.3 Safari/602.4.8	Safari	Mac OS X	Desktop
751	68513	1627	15095	849	37022	-18	Attempted 28 Errors 23 Max 5 Score -18	Task duration 187731 OverallScore -18 Attempted 28 Errors 23 Max 5 Score -18 OddOneOut Selection Correct Level On Responded RT Score 2 3 ERROR!! 1 15596 20190 4594 0 2 2 CORRECT 1 21529 29182 7653 -1 1 2 ERROR!! 2 30485 40390 9905 0 5 2 ERROR!! 2 41787 45486 3699 -1 8 7 ERROR!! 2 46799 51119 4320 -2 2 3 ERROR!! 2 52402 57999 5597 -3 8 9 ERROR!! 2 59283 64455 5172 -4 8 1 ERROR!! 2 65868 70743 4875…	1	2017-05-23 19:45:26 UTC	2017-05-23 19:49:09 UTC	Mozilla/5.0 (Macintosh; Intel Mac OS X 10_12_3) AppleWebKit/602.4.8 (KHTML, like Gecko) Version/10.0.3 Safari/602.4.8	Safari	Mac OS X	Desktop
751	68513	1627	15093	845	37022	6	CC trials 1 IC trials 0.5 CI trials 0.8333333333333334 II trials 0 CC RT 3565 IC RT 3817.5 CI RT 3385.1666666666665 II RT 3635.5	Task duration = 95832 OverallScore 6 CC trials 1 IC trials 0.5 CI trials 0.8333333333333334 II trials 0 CC RT 3565 IC RT 3817.5 CI RT 3385.1666666666665 II RT 3635.5 Problems CorrectAnswer ProbeText ProbeColour RightProbe LeftProbe ResponseChoice Feedback RT ICL Left RED 255 RED BLUE Left CORRECT 3593 IIR Right BLUE 16711680 RED BLUE Left INCORRECT! 4568 ICR Right RED 255 BLUE RED Right CORRECT 2…	1	2017-05-23 19:41:31 UTC	2017-05-23 19:44:02 UTC	Mozilla/5.0 (Macintosh; Intel Mac OS X 10_12_3) AppleWebKit/602.4.8 (KHTML, like Gecko) Version/10.0.3 Safari/602.4.8	Safari	Mac OS X	Desktop
751	68513	1627	15091	847	37022	-1		Task duration = 95205 -1 out of 7 attempted ProbeText OuterImg InnerImg Response Feedback RT Circle is not bigger than square Square Circle true CORRECT 6282 Circle is smaller than square Square Circle true INCORRECT! 8123 Square is not contained by circle Square Circle true INCORRECT! 10193 Square does not contain circle Square Circle false INCORRECT! 3226 Square is encapsulated by circle Square…	1	2017-05-23 19:39:16 UTC	2017-05-23 19:40:00 UTC	Mozilla/5.0 (Macintosh; Intel Mac OS X 10_12_3) AppleWebKit/602.4.8 (KHTML, like Gecko) Version/10.0.3 Safari/602.4.8	Safari	Mac OS X	Desktop
751	68513	1627	15089	848	37022	0	0	Task duration 116000 MaxScore 0 MeanScore 0 TargetString ResponseString RT Feedback 2320 2023 15429 INCORRECT! 914 149 13903 INCORRECT! 147 714 72497 INCORRECT!	1	2017-05-23 19:34:30 UTC	2017-05-23 19:37:45 UTC	Mozilla/5.0 (Macintosh; Intel Mac OS X 10_12_3) AppleWebKit/602.4.8 (KHTML, like Gecko) Version/10.0.3 Safari/602.4.8	Safari	Mac OS X	Desktop
751	60449	1627	15111	853	36636	7	5.5	Task duration 197948 AvgCorrect 5.5 MaxScore 7 8.gif 2273 Response 1 of 2 Empty 15.gif 1367 Token 1 of 4 20.gif 2467 Response 1 of 3 Empty 19.gif 1423 Response 2 of 3 Empty 8.gif 1691 Token 2 of 4 19.gif 1686 Token 3 of 4 20.gif 1087 Token 4 of 4 completed 13.gif 1251 Token 1 of 5 19.gif 1658 Response 1 of 3 Empty 1.gif 1331 Response 2 of 3 Empty 11.gif 1050 Token 2 of 5 20.gif 1331 Response 1 of…	1	2017-04-25 18:21:21 UTC	2017-04-25 18:24:05 UTC	Mozilla/5.0 (Windows NT 10.0; Win64; x64) AppleWebKit/537.36 (KHTML, like Gecko) Chrome/57.0.2987.133 Safari/537.36	Chrome	Windows 10	Desktop
751	60449	1627	15109	851	36636	23	Attempted 19 Errors 5 Max 5 Score 23 CorrectScore 42	Task duration 95557 OverallScore 23 Attempted 19 Errors 5 Max 5 Score 23 CorrectScore 42 TypeOfTrial ShapeTypeRight ShapeTypeLeft CopyingWhichSide Feedback CurrentScore RT Mismatch 4 4 Left CORRECT 1 3861 Mismatch 6 4 Left INCORRECT! 0 2703 Mismatch 6 6 Right CORRECT 1 4747 Mismatch 4 4 Left INCORRECT! 0 9736 Match 3 5 Left CORRECT 1 3343 Match 4 3 Right CORRECT 2 3962 Mismatch 3 5 Right CORRECT …	1	2017-04-25 18:16:56 UTC	2017-04-25 18:19:41 UTC	Mozilla/5.0 (Windows NT 10.0; Win64; x64) AppleWebKit/537.36 (KHTML, like Gecko) Chrome/57.0.2987.133 Safari/537.36	Chrome	Windows 10	Desktop
751	60449	1627	15107	850	36636	5	3.16667	Task duration 154326 MaxScore: 5 MeanScore 3.1666666666666665 TargetString ResponseString RT Feedback 1911 1911 5247 Correct 131710 131710 7499 Correct 1215214 4 4215 Incorrect 1643 4 2880 Incorrect 1019 1019 6252 Correct 19221 19221 6879 Correct 1161423 1161423 10701 Correct 41711246 41711246 15274 Correct 2215113103 10 2447 Incorrect	1	2017-04-25 18:09:30 UTC	2017-04-25 18:16:02 UTC	Mozilla/5.0 (Windows NT 10.0; Win64; x64) AppleWebKit/537.36 (KHTML, like Gecko) Chrome/57.0.2987.133 Safari/537.36	Chrome	Windows 10	Desktop
751	60449	1627	15105	855	36636	17	17	Task duration 187519 Batch: Song: OverallScore 17 DifficultyLevel Feedback MovesMade RT 1 CORRECT! 3 18477 2 CORRECT! 3 18726 3 Failed! 8 69810 2 CORRECT! 3 15341 3 CORRECT! 4 18003 4 CORRECT! 4 17414	1	2017-04-25 18:07:55 UTC	2017-04-25 18:11:08 UTC	Mozilla/5.0 (Windows NT 10.0; Win64; x64) AppleWebKit/537.36 (KHTML, like Gecko) Chrome/57.0.2987.133 Safari/537.36	Chrome	Windows 10	Desktop
751	60449	1627	15103	844	36636	5	4.75	Task duration 97992 MaxScore 5 MeanScore 4.75 TargetString ResponseString RT Feedback 0714 0714 4045 CORRECT! 26075 26075 6796 CORRECT! 874056 874016 7992 INCORRECT! 32645 32645 6108 CORRECT! 925481 924518 8738 INCORRECT! 57846 57846 5378 CORRECT! 415326 415623 7107 INCORRECT!	1	2017-04-25 17:58:56 UTC	2017-04-25 18:04:55 UTC	Mozilla/5.0 (Windows NT 10.0; Win64; x64) AppleWebKit/537.36 (KHTML, like Gecko) Chrome/57.0.2987.133 Safari/537.36	Chrome	Windows 10	Desktop
751	60449	1627	15101	846	36636	100	Attempted 19 Errors 0 Max 10 Score 100 CorrectScore 100	Task duration 95681 OverallScore 100 Attempted 19 Errors 0 Max 10 Score 100 CorrectScore 100 TrialType FeedbackText.text CurrentScore RT Matched CORRECT 1 3062 Mismatched CORRECT 2 1944 Mismatched CORRECT 4 2044 Matched CORRECT 6 2234 Mismatched CORRECT 9 3425 Mismatched CORRECT 12 2581 Mismatched CORRECT 16 2714 Mismatched CORRECT 20 2167 Mismatched CORRECT 25 2470 Matched CORRECT 30 3136 Mismat…	1	2017-04-25 17:59:14 UTC	2017-04-25 17:57:04 UTC	Mozilla/5.0 (Windows NT 10.0; Win64; x64) AppleWebKit/537.36 (KHTML, like Gecko) Chrome/57.0.2987.133 Safari/537.36	Chrome	Windows 10	Desktop
751	60449	1627	15099	852	36636	88	Attempted 13 Errors 0 Max 10 Score 88 CorrectScore 88	Task duration: 95420 OverallScore 88 Attempted 13 Errors 0 Max 10 Score 88 CorrectScore 88 TrialType Angle Feedback Score RT Match 270 CORRECT 4 6489 Match 270 CORRECT 8 6493 Mismatch 180 CORRECT 13 3849 Match 180 CORRECT 18 9595 Match 180 CORRECT 24 7404 Mismatch 180 CORRECT 30 4448 Mismatch 270 CORRECT 37 4573 Mismatch 180 CORRECT 44 3644 Match 90 CORRECT 52 9453 Match 270 CORRECT 60 10746 Mism…	1	2017-04-25 17:56:24 UTC	2017-04-25 17:57:42 UTC	Mozilla/5.0 (Windows NT 10.0; Win64; x64) AppleWebKit/537.36 (KHTML, like Gecko) Chrome/57.0.2987.133 Safari/537.36	Chrome	Windows 10	Desktop
751	60449	1627	15097	854	36636	5	4.5	Task duration 132754 MaxScore 5 MeanScore 4.5 TargetString ResponseString RT Feedback 151307 151307 6010 CORRECT! 1449013 1545106 9288 INCORRECT! 412150 412150 6056 CORRECT! 713814 713814 7594 CORRECT! 51229013 51220913 12600 INCORRECT! 1114725 1114725 8825 CORRECT! 127112113 121172113 8636 INCORRECT!	1	2017-04-25 17:49:35 UTC	2017-04-25 17:47:41 UTC	Mozilla/5.0 (Windows NT 10.0; Win64; x64) AppleWebKit/537.36 (KHTML, like Gecko) Chrome/57.0.2987.133 Safari/537.36	Chrome	Windows 10	Desktop
751	60449	1627	15095	849	36636	14	Attempted 18 Errors 2 Max 16 Score 14	Task duration 187185 OverallScore 14 Attempted 18 Errors 2 Max 16 Score 14 OddOneOut Selection Correct Level On Responded RT Score 8 8 CORRECT 1 6697 12744 6047 0 5 5 CORRECT 2 14005 18414 4409 1 4 4 CORRECT 3 19679 23054 3375 2 2 2 CORRECT 4 24382 28059 3677 3 8 8 CORRECT 8 29341 35010 5669 4 8 7 ERROR!! 6 36259 45818 9559 5 9 9 CORRECT 7 47123 60280 13157 4 1 1 CORRECT 5 61676 67332 5656 5 4 4 …	1	2017-04-25 17:43:46 UTC	2017-04-25 17:43:07 UTC	Mozilla/5.0 (Windows NT 10.0; Win64; x64) AppleWebKit/537.36 (KHTML, like Gecko) Chrome/57.0.2987.133 Safari/537.36	Chrome	Windows 10	Desktop
751	60449	1627	15093	845	36636	20	CC trials 0.875 IC trials 0.625 CI trials 1 II trials 0.75 CC RT 2184.125 IC RT 2177.625 CI RT 2732.125 II RT 2921	Task duration = 95592 OverallScore 20 CC trials 0.875 IC trials 0.625 CI trials 1 II trials 0.75 CC RT 2184.125 IC RT 2177.625 CI RT 2732.125 II RT 2921 Problems CorrectAnswer ProbeText ProbeColour RightProbe LeftProbe ResponseChoice Feedback RT CCR Right RED 16711680 RED BLUE Right CORRECT 3468 CIL Left RED 16711680 BLUE RED Left CORRECT 2616 IIL Left RED 255 RED BLUE Left CORRECT 1900 IIR Right…	1	2017-04-25 17:39:09 UTC	2017-04-25 17:36:58 UTC	Mozilla/5.0 (Windows NT 10.0; Win64; x64) AppleWebKit/537.36 (KHTML, like Gecko) Chrome/57.0.2987.133 Safari/537.36	Chrome	Windows 10	Desktop
751	60449	1627	15091	847	36636	12		Task duration = 95235 12 out of 16 attempted ProbeText OuterImg InnerImg Response Feedback RT Square is not bigger than circle Square Circle true CORRECT 4004 Square is not encapsulated by circle Square Circle false CORRECT 3412 Circle does not encapsulate square Square Circle false INCORRECT! 3134 Circle is smaller than square Square Circle true CORRECT 5264 Circle is bigger than square Square C…	1	2017-04-25 17:31:08 UTC	2017-04-25 17:36:02 UTC	Mozilla/5.0 (Windows NT 10.0; Win64; x64) AppleWebKit/537.36 (KHTML, like Gecko) Chrome/57.0.2987.133 Safari/537.36	Chrome	Windows 10	Desktop
751	60449	1627	15089	848	36636	6	4.57143	Task duration 142875 MaxScore 6 MeanScore 4.571428571428571 TargetString ResponseString RT Feedback 217 217 2987 CORRECT! 162518 162518 4389 CORRECT! 10191621 10191621 5421 CORRECT! 72341025 72341025 6909 CORRECT! 151020251722 151020251722 7823 CORRECT! 237161411181 161471823111 10052 INCORRECT! 133561719 133561719 7912 CORRECT! 2176413125 2176412513 11258 INCORRECT! 2115622025 2115622025 8155 CO…	1	2017-04-25 17:27:07 UTC	2017-04-25 17:29:44 UTC	Mozilla/5.0 (Windows NT 10.0; Win64; x64) AppleWebKit/537.36 (KHTML, like Gecko) Chrome/57.0.2987.133 Safari/537.36	Chrome	Windows 10	Desktop
751	59287	1627	15111	853	36400	6	4.6	Task duration 120426 AvgCorrect 4.6 MaxScore 6 Focus Lost At 5788 13.gif 2075 Response 1 of 3 Empty 6.gif 851 Response 2 of 3 Empty 20.gif 666 Token 1 of 4 23.gif 1346 Token 2 of 4 6.gif 1132 Response 1 of 2 Empty 13.gif 1203 Token 3 of 4 6.gif 852 Token 4 of 4 completed 24.gif 1399 Response 1 of 3 Empty 5.gif 595 Response 2 of 3 Empty 22.gif 637 Token 1 of 5 7.gif 1517 Response 1 of 3 Empty 2.gi…	1	2017-04-11 01:26:39 UTC	2017-04-11 01:25:29 UTC	Mozilla/5.0 (Windows NT 6.1; WOW64; rv:52.0) Gecko/20100101 Firefox/52.0	Firefox	Windows 7	Desktop
751	59287	1627	15109	851	36400	5	Attempted 21 Errors 8 Max 3 Score 5 CorrectScore 28	Task duration 94911 OverallScore 5 Attempted 21 Errors 8 Max 3 Score 5 CorrectScore 28 TypeOfTrial ShapeTypeRight ShapeTypeLeft CopyingWhichSide Feedback CurrentScore RT Match 6 4 Left CORRECT 1 3460 Match 5 4 Right INCORRECT! 0 3776 Mismatch 4 4 Right CORRECT 1 4105 Mismatch 5 4 Right CORRECT 2 4097 Mismatch 5 3 Left CORRECT 4 2889 Mismatch 3 3 Right INCORRECT! 2 2435 Mismatch 3 3 Left CORRECT 4…	1	2017-04-11 01:20:34 UTC	2017-04-11 01:19:46 UTC	Mozilla/5.0 (Windows NT 6.1; WOW64; rv:52.0) Gecko/20100101 Firefox/52.0	Firefox	Windows 7	Desktop
751	59287	1627	15107	850	36400	3	2.25	Task duration 93998 MaxScore: 3 MeanScore 2.25 TargetString ResponseString RT Feedback 242 242 6626 Correct 18516 1816 4539 Incorrect 113 113 3307 Correct 11721 21 3510 Incorrect 1422 1422 3850 Correct 16158 16158 5664 Correct 2113167 16 3998 Incorrect	1	2017-04-11 01:15:00 UTC	2017-04-11 01:16:42 UTC	Mozilla/5.0 (Windows NT 6.1; WOW64; rv:52.0) Gecko/20100101 Firefox/52.0	Firefox	Windows 7	Desktop
751	59287	1627	15105	855	36400	14	14	Task duration 190087 Batch: Song: OverallScore 14 DifficultyLevel Feedback MovesMade RT 1 CORRECT! 3 56713 2 CORRECT! 3 14119 3 CORRECT! 4 26340 4 CORRECT! 4 16963	1	2017-04-11 01:13:18 UTC	2017-04-11 01:16:35 UTC	Mozilla/5.0 (Windows NT 6.1; WOW64; rv:52.0) Gecko/20100101 Firefox/52.0	Firefox	Windows 7	Desktop
751	59287	1627	15103	844	36400	4	3.33333	Task duration 94932 MaxScore 4 MeanScore 3.3333333333333335 TargetString ResponseString RT Feedback 2170 2173 23241 INCORRECT! 015 015 7142 CORRECT! 8307 8301 5950 INCORRECT! 351 351 3326 CORRECT! 0384 0384 5946 CORRECT! 25164 31749 12613 INCORRECT!	1	2017-04-11 01:09:22 UTC	2017-04-11 01:10:15 UTC	Mozilla/5.0 (Windows NT 6.1; WOW64; rv:52.0) Gecko/20100101 Firefox/52.0	Firefox	Windows 7	Desktop
751	59287	1627	15101	846	36400	90	Attempted 20 Errors 1 Max 9 Score 90 CorrectScore 99	Task duration 95115 OverallScore 90 Attempted 20 Errors 1 Max 9 Score 90 CorrectScore 99 TrialType FeedbackText.text CurrentScore RT Mismatched CORRECT 1 2312 Mismatched CORRECT 2 1565 Mismatched CORRECT 4 2303 Mismatched CORRECT 6 1525 Mismatched CORRECT 9 2167 Matched CORRECT 12 2583 Matched CORRECT 16 2608 Mismatched CORRECT 20 1983 Mismatched CORRECT 25 2687 Matched CORRECT 30 3085 Mismatched…	1	2017-04-11 01:05:48 UTC	2017-04-11 01:04:28 UTC	Mozilla/5.0 (Windows NT 6.1; WOW64; rv:52.0) Gecko/20100101 Firefox/52.0	Firefox	Windows 7	Desktop
751	59287	1627	15099	852	36400	60	Attempted 12 Errors 1 Max 9 Score 60 CorrectScore 69	Task duration: 94568 OverallScore 60 Attempted 12 Errors 1 Max 9 Score 60 CorrectScore 69 TrialType Angle Feedback Score RT Mismatch 180 CORRECT 4 3151 Match 180 CORRECT 8 3888 Match 90 CORRECT 13 6378 Match 90 CORRECT 18 6847 Match 270 CORRECT 24 5027 Mismatch 180 CORRECT 30 4480 Mismatch 270 CORRECT 37 6459 Mismatch 180 CORRECT 44 6620 Mismatch 270 CORRECT 52 5457 Match 90 CORRECT 60 6238 Misma…	1	2017-04-11 01:03:09 UTC	2017-04-11 01:01:31 UTC	Mozilla/5.0 (Windows NT 6.1; WOW64; rv:52.0) Gecko/20100101 Firefox/52.0	Firefox	Windows 7	Desktop
751	59287	1627	15097	854	36400	3	3	Task duration 88687 MaxScore 3 MeanScore 3 TargetString ResponseString RT Feedback 6089 10951 31651 INCORRECT! 8129 8129 1759 CORRECT! 62715 67215 2928 INCORRECT! 1307 1307 2719 CORRECT! 8121411 8121511 2860 INCORRECT!	1	2017-04-11 00:59:59 UTC	2017-04-11 01:01:33 UTC	Mozilla/5.0 (Windows NT 6.1; WOW64; rv:52.0) Gecko/20100101 Firefox/52.0	Firefox	Windows 7	Desktop
751	59287	1627	15095	849	36400	9	Attempted 17 Errors 4 Max 13 Score 9	Task duration 185496 OverallScore 9 Attempted 17 Errors 4 Max 13 Score 9 OddOneOut Selection Correct Level On Responded RT Score 2 2 CORRECT 1 7615 11196 3581 0 3 3 CORRECT 2 12565 17700 5135 1 9 9 CORRECT 3 19026 25172 6146 2 2 2 CORRECT 4 26482 29332 2850 3 1 1 CORRECT 8 30649 39318 8669 4 4 4 CORRECT 6 40720 47134 6414 5 6 6 CORRECT 7 48472 59392 10920 6 1 1 CORRECT 5 60721 66488 5767 7 6 6 CO…	1	2017-04-11 00:56:07 UTC	2017-04-11 00:59:37 UTC	Mozilla/5.0 (Windows NT 6.1; WOW64; rv:52.0) Gecko/20100101 Firefox/52.0	Firefox	Windows 7	Desktop
751	59287	1627	15093	845	36400	10	CC trials 1 IC trials 0.2222222222222222 CI trials 0.8888888888888888 II trials 0.5 CC RT 2189 IC RT 2327 CI RT 2137 II RT 2766	Task duration = 94718 OverallScore 10 CC trials 1 IC trials 0.2222222222222222 CI trials 0.8888888888888888 II trials 0.5 CC RT 2189 IC RT 2327 CI RT 2137 II RT 2766 Problems CorrectAnswer ProbeText ProbeColour RightProbe LeftProbe ResponseChoice Feedback RT ICL Left BLUE 16711680 BLUE RED Right INCORRECT! 1468 CIR Right RED 16711680 RED BLUE Right CORRECT 3145 IIR Right RED 255 BLUE RED Right CO…	1	2017-04-11 00:50:25 UTC	2017-04-11 00:52:08 UTC	Mozilla/5.0 (Windows NT 6.1; WOW64; rv:52.0) Gecko/20100101 Firefox/52.0	Firefox	Windows 7	Desktop
751	59287	1627	15091	847	36400	5		Task duration = 95066 5 out of 13 attempted ProbeText OuterImg InnerImg Response Feedback RT Focus Lost At 4707 Circle is contained by square Square Circle false CORRECT 6335 Circle is not bigger than square Square Circle true INCORRECT! 3865 Square is contained by circle Square Circle false CORRECT 5569 Square is smaller than circle Square Circle false CORRECT 5638 Square contains circle Square …	1	2017-04-11 00:49:56 UTC	2017-04-11 00:48:38 UTC	Mozilla/5.0 (Windows NT 6.1; WOW64; rv:52.0) Gecko/20100101 Firefox/52.0	Firefox	Windows 7	Desktop
751	59287	1627	15089	848	36400	5	3.8	Task duration 77508 MaxScore 5 MeanScore 3.8 TargetString ResponseString RT Feedback 1710 1710 1397 CORRECT! 21819 21819 2147 CORRECT! 2112315 2112315 3271 CORRECT! 21101322 21101322 4274 CORRECT! 171514113 171351114 5149 INCORRECT! 25410316 25410316 3940 CORRECT! 8242215912 8242215129 4219 INCORRECT! 13182589 13188925 3712 INCORRECT!	1	2017-04-11 00:42:30 UTC	2017-04-11 00:43:58 UTC	Mozilla/5.0 (Windows NT 6.1; WOW64; rv:52.0) Gecko/20100101 Firefox/52.0	Firefox	Windows 7	Desktop
751	67648	1627	15111	853	36304	8	6.14286	Task duration 237105 AvgCorrect 6.142857142857143 MaxScore 8 24.gif 5779 Response 1 of 3 Empty 12.gif 2013 Response 2 of 3 Empty 20.gif 2073 Token 1 of 4 9.gif 3703 Response 1 of 2 Empty 24.gif 1601 Token 2 of 4 12.gif 2546 Token 3 of 4 9.gif 1800 Token 4 of 4 completed 7.gif 2717 Response 1 of 4 Empty 25.gif 1523 Response 2 of 4 Empty 1.gif 1394 Response 3 of 4 Empty 6.gif 859 Token 1 of 5 19.gi…	1	2017-04-06 15:58:19 UTC	2017-04-06 16:02:54 UTC	Mozilla/5.0 (Macintosh; Intel Mac OS X 10_12_3) AppleWebKit/602.4.8 (KHTML, like Gecko) Version/10.0.3 Safari/602.4.8	Safari	Mac OS X	Desktop
751	67648	1627	15109	851	36304	5	Attempted 17 Errors 6 Max 4 Score 5 CorrectScore 31	Task duration 95462 OverallScore 5 Attempted 17 Errors 6 Max 4 Score 5 CorrectScore 31 TypeOfTrial ShapeTypeRight ShapeTypeLeft CopyingWhichSide Feedback CurrentScore RT Match 5 4 Right CORRECT 1 3422 Mismatch 5 3 Left CORRECT 2 4353 Mismatch 5 4 Right CORRECT 4 4546 Match 3 3 Left CORRECT 6 3306 Mismatch 6 5 Right CORRECT 9 7877 Mismatch 6 4 Left CORRECT 12 4891 Match 6 4 Right CORRECT 16 6245 M…	1	2017-04-06 15:53:55 UTC	2017-04-06 15:55:35 UTC	Mozilla/5.0 (Macintosh; Intel Mac OS X 10_12_3) AppleWebKit/602.4.8 (KHTML, like Gecko) Version/10.0.3 Safari/602.4.8	Safari	Mac OS X	Desktop
751	67648	1627	15107	850	36304	6	4.14286	Task duration 203937 MaxScore: 6 MeanScore 4.142857142857143 TargetString ResponseString RT Feedback 225 225 5373 Correct 131511 131511 6008 Correct 17412 17412 9922 Correct 2412810 2412810 12647 Correct 1713172310 10 1664 Incorrect 31821167 7 2187 Incorrect 1661322 1661322 9812 Correct 1641515 1641515 12849 Correct 1512312223 1512312223 17298 Correct 115710182321 7 2111 Incorrect	1	2017-04-06 15:49:51 UTC	2017-04-06 15:56:06 UTC	Mozilla/5.0 (Macintosh; Intel Mac OS X 10_12_3) AppleWebKit/602.4.8 (KHTML, like Gecko) Version/10.0.3 Safari/602.4.8	Safari	Mac OS X	Desktop
751	67648	1627	15105	855	36304	19	19	Task duration 187392 Batch: Song: OverallScore 19 DifficultyLevel Feedback MovesMade RT 1 CORRECT! 3 17813 2 CORRECT! 3 19063 3 CORRECT! 4 18741 4 CORRECT! 4 18984 5 CORRECT! 5 32904	1	2017-04-06 15:49:02 UTC	2017-04-06 15:52:15 UTC	Mozilla/5.0 (Macintosh; Intel Mac OS X 10_12_3) AppleWebKit/602.4.8 (KHTML, like Gecko) Version/10.0.3 Safari/602.4.8	Safari	Mac OS X	Desktop
751	67648	1627	15103	844	36304	6	5.2	Task duration 137235 MaxScore 6 MeanScore 5.2 TargetString ResponseString RT Feedback 7834 7834 8567 CORRECT! 09836 09836 7652 CORRECT! 601395 601395 9821 CORRECT! 5219473 5291743 10187 INCORRECT! 549617 549671 7622 INCORRECT! 50429 50429 8440 CORRECT! 812546 812546 7820 CORRECT! 2801749 2810148 15521 INCORRECT!	1	2017-04-06 15:43:59 UTC	2017-04-06 15:46:24 UTC	Mozilla/5.0 (Macintosh; Intel Mac OS X 10_12_3) AppleWebKit/602.4.8 (KHTML, like Gecko) Version/10.0.3 Safari/602.4.8	Safari	Mac OS X	Desktop
751	67648	1627	15101	846	36304	68	Attempted 19 Errors 2 Max 8 Score 68 CorrectScore 74	Task duration 95482 OverallScore 68 Attempted 19 Errors 2 Max 8 Score 68 CorrectScore 74 TrialType FeedbackText.text CurrentScore RT Matched CORRECT 1 2352 Matched CORRECT 2 1917 Matched CORRECT 4 2315 Mismatched INCORRECT! 2 2764 Mismatched CORRECT 4 2694 Mismatched CORRECT 6 2101 Matched CORRECT 9 3527 Mismatched CORRECT 12 4100 Mismatched INCORRECT! 8 2966 Mismatched CORRECT 12 3380 Matched CO…	1	2017-04-06 15:38:36 UTC	2017-04-06 15:43:04 UTC	Mozilla/5.0 (Macintosh; Intel Mac OS X 10_12_3) AppleWebKit/602.4.8 (KHTML, like Gecko) Version/10.0.3 Safari/602.4.8	Safari	Mac OS X	Desktop
751	67648	1627	15099	852	36304	52	Attempted 13 Errors 2 Max 8 Score 52 CorrectScore 64	Task duration: 95729 OverallScore 52 Attempted 13 Errors 2 Max 8 Score 52 CorrectScore 64 TrialType Angle Feedback Score RT Mismatch 180 CORRECT 4 3433 Match 270 INCORRECT! 0 4782 Mismatch 180 CORRECT 4 9733 Match 180 CORRECT 8 5353 Match 90 CORRECT 13 9156 Mismatch 90 CORRECT 18 6815 Mismatch 180 CORRECT 24 4989 Mismatch 90 CORRECT 30 7121 Mismatch 90 CORRECT 37 5520 Match 180 CORRECT 44 3142 Mi…	2	2017-04-05 15:54:59 UTC	2017-04-05 16:01:01 UTC	Mozilla/5.0 (Macintosh; Intel Mac OS X 10_12_3) AppleWebKit/602.4.8 (KHTML, like Gecko) Version/10.0.3 Safari/602.4.8	Safari	Mac OS X	Desktop
751	67648	1627	15097	854	36304	6	5	Task duration 115685 MaxScore 6 MeanScore 5 TargetString ResponseString RT Feedback 291311 291311 4387 CORRECT! 3110514 3110514 5452 CORRECT! 82107141 21071319 6037 INCORRECT! 91340 91340 4232 CORRECT! 1012131521 1012131521 5263 CORRECT! 8013712104 801374129 8013 INCORRECT! 4019132 15117326 4390 INCORRECT!	1	2017-04-05 15:55:07 UTC	2017-04-05 15:57:07 UTC	Mozilla/5.0 (Macintosh; Intel Mac OS X 10_12_3) AppleWebKit/602.4.8 (KHTML, like Gecko) Version/10.0.3 Safari/602.4.8	Safari	Mac OS X	Desktop
751	67648	1627	15095	849	36304	13	Attempted 17 Errors 2 Max 15 Score 13	Task duration 187056 OverallScore 13 Attempted 17 Errors 2 Max 15 Score 13 OddOneOut Selection Correct Level On Responded RT Score 8 8 CORRECT 1 5857 7956 2099 0 8 8 CORRECT 2 9331 14516 5185 1 2 2 CORRECT 3 15828 23524 7696 2 2 2 CORRECT 4 24861 28140 3279 3 5 5 CORRECT 6 29415 36901 7486 4 7 7 CORRECT 5 38161 43413 5252 5 4 4 CORRECT 7 44744 51590 6846 6 2 2 CORRECT 8 52915 62206 9291 7 9 9 COR…	1	2017-04-05 15:50:50 UTC	2017-04-05 15:54:51 UTC	Mozilla/5.0 (Macintosh; Intel Mac OS X 10_12_3) AppleWebKit/602.4.8 (KHTML, like Gecko) Version/10.0.3 Safari/602.4.8	Safari	Mac OS X	Desktop
751	67648	1627	15093	845	36304	8	CC trials 0.875 IC trials 0.2222222222222222 CI trials 0.5555555555555556 II trials 0.875 CC RT 2010.5 IC RT 2343.3333333333335 CI RT 2299.6666666666665 II RT 2627.5	Task duration = 95909 OverallScore 8 CC trials 0.875 IC trials 0.2222222222222222 CI trials 0.5555555555555556 II trials 0.875 CC RT 2010.5 IC RT 2343.3333333333335 CI RT 2299.6666666666665 II RT 2627.5 Problems CorrectAnswer ProbeText ProbeColour RightProbe LeftProbe ResponseChoice Feedback RT CIL Left BLUE 255 RED BLUE Left CORRECT 1825 ICL Left BLUE 16711680 BLUE RED Right INCORRECT! 2134 IIR …	1	2017-04-05 15:48:58 UTC	2017-04-05 15:50:10 UTC	Mozilla/5.0 (Macintosh; Intel Mac OS X 10_12_3) AppleWebKit/602.4.8 (KHTML, like Gecko) Version/10.0.3 Safari/602.4.8	Safari	Mac OS X	Desktop
751	67648	1627	15091	847	36304	2		Task duration = 95429 2 out of 14 attempted ProbeText OuterImg InnerImg Response Feedback RT Circle is not encapsulated by square Square Circle false INCORRECT! 6757 Square is not contained by circle Square Circle false CORRECT 4250 Circle is smaller than square Square Circle false CORRECT 3796 Circle is not smaller than square Square Circle false INCORRECT! 6170 Circle is smaller than square Squ…	1	2017-04-05 15:38:56 UTC	2017-04-05 15:37:37 UTC	Mozilla/5.0 (Macintosh; Intel Mac OS X 10_12_3) AppleWebKit/602.4.8 (KHTML, like Gecko) Version/10.0.3 Safari/602.4.8	Safari	Mac OS X	Desktop
751	67648	1627	15089	848	36304	6	4.33333	Task duration 119468 MaxScore 6 MeanScore 4.333333333333333 TargetString ResponseString RT Feedback 411 411 6890 CORRECT! 627 627 4185 CORRECT! 192815 192815 5577 CORRECT! 2022112512 2022112512 7701 CORRECT! 2519129222 2519129222 7949 CORRECT! 132411491223 132411292314 8910 INCORRECT! 24191210623 24191210623 6183 CORRECT! 13781162317 13781161723 5843 INCORRECT! 1292515205 1292520515 6048 INCORREC…	1	2017-04-05 15:33:11 UTC	2017-04-05 15:35:20 UTC	Mozilla/5.0 (Macintosh; Intel Mac OS X 10_12_3) AppleWebKit/602.4.8 (KHTML, like Gecko) Version/10.0.3 Safari/602.4.8	Safari	Mac OS X	Desktop
751	67290	1627	15095	849	36181	1	Attempted 11 Errors 5 Max 6 Score 1	Task duration 187157 OverallScore 1 Attempted 11 Errors 5 Max 6 Score 1 OddOneOut Selection Correct Level On Responded RT Score 5 5 CORRECT 1 7134 12670 5536 0 2 5 ERROR!! 2 14068 29382 15314 1 3 3 CORRECT 2 30730 41998 11268 0 4 4 CORRECT 3 43350 53055 9705 1 5 5 CORRECT 4 54317 57903 3586 2 9 9 CORRECT 6 59268 72055 12787 3 1 4 ERROR!! 6 73352 92056 18704 4 2 2 CORRECT 8 93401 119188 25787 3 8 …	1	2017-03-31 15:27:58 UTC	2017-03-31 15:30:55 UTC	Mozilla/5.0 (Macintosh; Intel Mac OS X 10_12_3) AppleWebKit/602.4.8 (KHTML, like Gecko) Version/10.0.3 Safari/602.4.8	Safari	Mac OS X	Desktop
751	67290	1627	15093	845	36181	-1	CC trials 1 IC trials 0 CI trials 0.875 II trials 0 CC RT 1980.25 IC RT 3466.625 CI RT 2632.5 II RT 2386.4285714285716	Task duration = 95404 OverallScore -1 CC trials 1 IC trials 0 CI trials 0.875 II trials 0 CC RT 1980.25 IC RT 3466.625 CI RT 2632.5 II RT 2386.4285714285716 Problems CorrectAnswer ProbeText ProbeColour RightProbe LeftProbe ResponseChoice Feedback RT CCL Left RED 16711680 BLUE RED Left CORRECT 2193 CIL Left RED 16711680 BLUE RED Left CORRECT 3379 CCR Right RED 16711680 RED BLUE Right CORRECT 2492 …	1	2017-03-31 15:24:43 UTC	2017-03-31 15:27:08 UTC	Mozilla/5.0 (Macintosh; Intel Mac OS X 10_12_3) AppleWebKit/602.4.8 (KHTML, like Gecko) Version/10.0.3 Safari/602.4.8	Safari	Mac OS X	Desktop
751	67290	1627	15091	847	36181	6		Task duration = 95541 6 out of 12 attempted ProbeText OuterImg InnerImg Response Feedback RT Circle does not contain square Square Circle false INCORRECT! 8957 Circle is not smaller than square Square Circle true INCORRECT! 7744 Square is contained by circle Square Circle false CORRECT 8132 Square does not contain circle Square Circle true CORRECT 9388 Square is not smaller than circle Square Cir…	1	2017-03-31 15:22:13 UTC	2017-03-31 15:23:57 UTC	Mozilla/5.0 (Macintosh; Intel Mac OS X 10_12_3) AppleWebKit/602.4.8 (KHTML, like Gecko) Version/10.0.3 Safari/602.4.8	Safari	Mac OS X	Desktop
751	67290	1627	15089	848	36181	6	4	Task duration 145225 MaxScore 6 MeanScore 4 TargetString ResponseString RT Feedback 414 414 9154 CORRECT! 5229 5229 5930 CORRECT! 72398 72398 9468 CORRECT! 4228613 4822136 12631 INCORRECT! 2581214 2581214 8842 CORRECT! 72117915 72117915 7970 CORRECT! 122216251 122216251 12875 CORRECT! 8211712231422 8211712222314 11757 INCORRECT! 242025162311 232025241611 10261 INCORRECT!	1	2017-03-31 15:18:41 UTC	2017-03-31 15:19:18 UTC	Mozilla/5.0 (Macintosh; Intel Mac OS X 10_12_3) AppleWebKit/602.4.8 (KHTML, like Gecko) Version/10.0.3 Safari/602.4.8	Safari	Mac OS X	Desktop
751	67531	1627	15089	848	36177				1	2017-03-31 15:05:00 UTC	2017-03-31 15:05:00 UTC	Mozilla/5.0 (Macintosh; Intel Mac OS X 10_11_6) AppleWebKit/603.1.30 (KHTML, like Gecko) Version/10.1 Safari/603.1.30	Safari	Mac OS X	Desktop
751	67290	1627	15095	849	36024	12	Attempted 12 Errors 0 Max 12 Score 12	Task duration 187807 OverallScore 12 Attempted 12 Errors 0 Max 12 Score 12 OddOneOut Selection Correct Level On Responded RT Score 7 7 CORRECT 1 8891 22071 13180 0 7 7 CORRECT 2 23327 33654 10327 1 7 7 CORRECT 3 34948 54949 20001 2 9 9 CORRECT 4 56193 60317 4124 3 7 7 CORRECT 7 61611 75925 14314 4 2 2 CORRECT 6 77193 85181 7988 5 3 3 CORRECT 5 86614 92549 5935 6 2 2 CORRECT 8 93827 104413 10586 7…	1	2017-03-27 20:15:36 UTC	2017-03-27 20:18:50 UTC	Mozilla/5.0 (Macintosh; Intel Mac OS X 10_11_6) AppleWebKit/602.4.8 (KHTML, like Gecko) Version/10.0.3 Safari/602.4.8	Safari	Mac OS X	Desktop
751	67290	1627	15093	845	36024	4	CC trials 0.8333333333333334 IC trials 0.6666666666666666 CI trials 0.6666666666666666 II trials 0.16666666666666666 CC RT 2209.6666666666665 IC RT 2687.3333333333335 CI RT 5024.333333333333 II RT 4091	Task duration = 95631 OverallScore 4 CC trials 0.8333333333333334 IC trials 0.6666666666666666 CI trials 0.6666666666666666 II trials 0.16666666666666666 CC RT 2209.6666666666665 IC RT 2687.3333333333335 CI RT 5024.333333333333 II RT 4091 Problems CorrectAnswer ProbeText ProbeColour RightProbe LeftProbe ResponseChoice Feedback RT CIL Left RED 16711680 BLUE RED Right INCORRECT! 15872 CIR Right RED…	1	2017-03-27 20:14:33 UTC	2017-03-27 20:14:39 UTC	Mozilla/5.0 (Macintosh; Intel Mac OS X 10_11_6) AppleWebKit/602.4.8 (KHTML, like Gecko) Version/10.0.3 Safari/602.4.8	Safari	Mac OS X	Desktop
751	67290	1627	15091	847	36024	7		Task duration = 95379 7 out of 9 attempted ProbeText OuterImg InnerImg Response Feedback RT Circle is contained by square Square Circle false CORRECT 15229 Circle is not encapsulated by square Square Circle true INCORRECT! 8325 Circle is encapsulated by square Square Circle true CORRECT 8212 Circle is smaller than square Square Circle false CORRECT 5609 Circle encapsulates square Square Circle tr…	1	2017-03-27 20:09:49 UTC	2017-03-27 20:13:52 UTC	Mozilla/5.0 (Macintosh; Intel Mac OS X 10_11_6) AppleWebKit/602.4.8 (KHTML, like Gecko) Version/10.0.3 Safari/602.4.8	Safari	Mac OS X	Desktop
751	67290	1627	15089	848	36024	2	2	Task duration 168844 MaxScore 2 MeanScore 2 TargetString ResponseString RT Feedback 311 311 17349 CORRECT! 24816 16248 73620 INCORRECT! 144 144 11498 CORRECT! 25913 25139 20374 INCORRECT! 1016 1016 10492 CORRECT! 102213 132210 8238 INCORRECT!	1	2017-03-27 20:05:57 UTC	2017-03-27 20:08:53 UTC	Mozilla/5.0 (Macintosh; Intel Mac OS X 10_11_6) AppleWebKit/602.4.8 (KHTML, like Gecko) Version/10.0.3 Safari/602.4.8	Safari	Mac OS X	Desktop
751	66659	1627	15099	852	36001	11	Attempted 13 Errors 5 Max 6 Score 11 CorrectScore 38	Task duration: 95726 OverallScore 11 Attempted 13 Errors 5 Max 6 Score 11 CorrectScore 38 TrialType Angle Feedback Score RT Match 270 CORRECT 4 10273 Match 180 CORRECT 8 3316 Match 180 CORRECT 13 4549 Match 180 CORRECT 18 5334 Match 90 CORRECT 24 6134 Mismatch 270 INCORRECT! 18 4093 Mismatch 270 INCORRECT! 12 7151 Mismatch 90 CORRECT 17 6861 Match 90 INCORRECT! 12 6242 Match 180 CORRECT 17 4973 M…	1	2017-03-27 15:18:47 UTC	2017-03-27 15:20:29 UTC	Mozilla/5.0 (Macintosh; Intel Mac OS X 10_12_3) AppleWebKit/602.4.8 (KHTML, like Gecko) Version/10.0.3 Safari/602.4.8	Safari	Mac OS X	Desktop
751	66659	1627	15097	854	36001	3	2.5	Task duration 77034 MaxScore 3 MeanScore 2.5 TargetString ResponseString RT Feedback 4141213 412139 8858 INCORRECT! 6213 2613 3940 INCORRECT! 17 17 3255 CORRECT! 6100 6100 6655 CORRECT! 48513 48913 9783 INCORRECT!	1	2017-03-27 15:18:50 UTC	2017-03-27 15:18:02 UTC	Mozilla/5.0 (Macintosh; Intel Mac OS X 10_12_3) AppleWebKit/602.4.8 (KHTML, like Gecko) Version/10.0.3 Safari/602.4.8	Safari	Mac OS X	Desktop
751	66659	1627	15095	849	36001	11	Attempted 17 Errors 3 Max 14 Score 11	Task duration 187383 OverallScore 11 Attempted 17 Errors 3 Max 14 Score 11 OddOneOut Selection Correct Level On Responded RT Score 8 8 CORRECT 1 8096 26031 17935 0 7 7 CORRECT 2 27403 30470 3067 1 1 1 CORRECT 3 31733 46118 14385 2 9 9 CORRECT 4 47515 52367 4852 3 6 6 CORRECT 6 53655 62376 8721 4 6 6 CORRECT 8 63655 75344 11689 5 9 9 CORRECT 5 76602 80104 3502 6 2 7 ERROR!! 8 81349 91033 9684 7 6 …	1	2017-03-27 15:15:00 UTC	2017-03-27 15:18:13 UTC	Mozilla/5.0 (Macintosh; Intel Mac OS X 10_12_3) AppleWebKit/602.4.8 (KHTML, like Gecko) Version/10.0.3 Safari/602.4.8	Safari	Mac OS X	Desktop
751	66659	1627	15093	845	36001	1	CC trials 1 IC trials 0.75 CI trials 0 II trials 0 CC RT 7414.333333333333 IC RT 6103 CI RT 16209 II RT 4288.5	Task duration = 95808 OverallScore 1 CC trials 1 IC trials 0.75 CI trials 0 II trials 0 CC RT 7414.333333333333 IC RT 6103 CI RT 16209 II RT 4288.5 Problems CorrectAnswer ProbeText ProbeColour RightProbe LeftProbe ResponseChoice Feedback RT CCR Right RED 16711680 RED BLUE Right CORRECT 15667 ICL Left BLUE 16711680 BLUE RED Left CORRECT 8099 CIR Right RED 16711680 RED BLUE Left INCORRECT! 25771 IC…	2	2017-03-27 15:09:33 UTC	2017-03-27 15:11:52 UTC	Mozilla/5.0 (Macintosh; Intel Mac OS X 10_12_3) AppleWebKit/602.4.8 (KHTML, like Gecko) Version/10.0.3 Safari/602.4.8	Safari	Mac OS X	Desktop
751	66659	1627	15091	847	36001	3		Task duration = 95317 3 out of 7 attempted ProbeText OuterImg InnerImg Response Feedback RT Circle is smaller than square Square Circle true CORRECT 12869 Circle does not contain square Square Circle true INCORRECT! 9840 Circle contains square Square Circle true CORRECT 10039 Circle is not contained by square Square Circle true CORRECT 12324 Circle is smaller than square Square Circle false CORRE…	1	2017-03-27 15:08:29 UTC	2017-03-27 15:10:09 UTC	Mozilla/5.0 (Macintosh; Intel Mac OS X 10_12_3) AppleWebKit/602.4.8 (KHTML, like Gecko) Version/10.0.3 Safari/602.4.8	Safari	Mac OS X	Desktop
751	66659	1627	15089	848	36001	5	3.5	Task duration 101624 MaxScore 5 MeanScore 3.5 TargetString ResponseString RT Feedback 2415 2415 13269 CORRECT! 221021 221021 7101 CORRECT! 53168 53168 9065 CORRECT! 13811154 13811154 7782 CORRECT! 7235101315 2375101315 11886 INCORRECT! 1924101117 1924101711 6007 INCORRECT! 183120 181320 5208 INCORRECT!	1	2017-03-27 15:04:12 UTC	2017-03-27 15:06:04 UTC	Mozilla/5.0 (Macintosh; Intel Mac OS X 10_12_3) AppleWebKit/602.4.8 (KHTML, like Gecko) Version/10.0.3 Safari/602.4.8	Safari	Mac OS X	Desktop
751	66914	1627	15095	849	35799	9	Attempted 9 Errors 0 Max 9 Score 9	Task duration 186458 OverallScore 9 Attempted 9 Errors 0 Max 9 Score 9 OddOneOut Selection Correct Level On Responded RT Score 3 3 CORRECT 1 9046 15000 5954 0 5 5 CORRECT 2 16309 25008 8699 1 2 2 CORRECT 3 26342 41616 15274 2 7 7 CORRECT 4 42898 51944 9046 3 4 4 CORRECT 8 53230 71401 18171 4 9 9 CORRECT 6 72814 91715 18901 5 5 5 CORRECT 5 93062 109018 15956 6 5 5 CORRECT 7 110398 143868 33470 7 5…	1	2017-03-21 18:38:50 UTC	2017-03-21 18:41:53 UTC	Mozilla/5.0 (Macintosh; Intel Mac OS X 10_12_3) AppleWebKit/602.4.8 (KHTML, like Gecko) Version/10.0.3 Safari/602.4.8	Safari	Mac OS X	Desktop
751	66914	1627	15093	845	35799	0	CC trials 1 IC trials 0 CI trials 1 II trials 0 CC RT 7049.5 IC RT 11827 CI RT 11664.666666666666 II RT 4244.666666666667	Task duration = 95208 OverallScore 0 CC trials 1 IC trials 0 CI trials 1 II trials 0 CC RT 7049.5 IC RT 11827 CI RT 11664.666666666666 II RT 4244.666666666667 Problems CorrectAnswer ProbeText ProbeColour RightProbe LeftProbe ResponseChoice Feedback RT ICR Right RED 255 BLUE RED Left INCORRECT! 17185 ICL Left BLUE 16711680 BLUE RED Right INCORRECT! 6469 CCL Left RED 16711680 BLUE RED Left CORRECT …	1	2017-03-21 18:35:00 UTC	2017-03-21 18:36:26 UTC	Mozilla/5.0 (Macintosh; Intel Mac OS X 10_12_3) AppleWebKit/602.4.8 (KHTML, like Gecko) Version/10.0.3 Safari/602.4.8	Safari	Mac OS X	Desktop
751	66914	1627	15091	847	35799	-3		Task duration = 95648 -3 out of 3 attempted ProbeText OuterImg InnerImg Response Feedback RT Circle is smaller than square Square Circle true INCORRECT! 13921 Circle is not smaller than square Square Circle true INCORRECT! 20406 Circle is not bigger than square Square Circle true INCORRECT! 39867	1	2017-03-21 18:31:07 UTC	2017-03-21 18:32:22 UTC	Mozilla/5.0 (Macintosh; Intel Mac OS X 10_12_3) AppleWebKit/602.4.8 (KHTML, like Gecko) Version/10.0.3 Safari/602.4.8	Safari	Mac OS X	Desktop
751	66914	1627	15089	848	35799	6	3.85714	Task duration 179160 MaxScore 6 MeanScore 3.857142857142857 TargetString ResponseString RT Feedback 1922 1922 8968 CORRECT! 13223 23132 19254 INCORRECT! 126 126 6585 CORRECT! 19112 19112 6161 CORRECT! 5212217 5212217 8807 CORRECT! 127111722 127111722 11325 CORRECT! 25122219124 25122219241 18563 INCORRECT! 423241221 423241221 16311 CORRECT! 101216242520 101216242520 11098 CORRECT! 145181151325 145…	1	2017-03-21 18:25:56 UTC	2017-03-21 18:27:19 UTC	Mozilla/5.0 (Macintosh; Intel Mac OS X 10_12_3) AppleWebKit/602.4.8 (KHTML, like Gecko) Version/10.0.3 Safari/602.4.8	Safari	Mac OS X	Desktop
751	66659	1627	15111	853	35628	3	3	Task duration 73677 AvgCorrect 3 MaxScore 3 8.gif 5047 Response 1 of 4 Empty 11.gif 2995 Response 2 of 4 Empty 4.gif 2652 Response 3 of 4 Empty 6.gif 1639 Token 1 of 4 6.gif 9844 Response 1 of 1 Found ERROR! 16.gif 1639 Response 1 of 2 Empty 20.gif 2265 Token 1 of 3 15.gif 2160 Token 2 of 3 16.gif 4448 Token 3 of 3 completed 19.gif 5048 Token 1 of 4 1.gif 1820 Response 1 of 3 Empty 1.gif 1078 Res…	1	2017-03-17 16:21:12 UTC	2017-03-17 16:22:33 UTC	Mozilla/5.0 (Macintosh; Intel Mac OS X 10_12_2) AppleWebKit/602.3.12 (KHTML, like Gecko) Version/10.0.2 Safari/602.3.12	Safari	Mac OS X	Desktop
751	66659	1627	15109	851	35628	-3	Attempted 5 Errors 3 Max 1 Score -3 CorrectScore 2	Task duration 94957 OverallScore -3 Attempted 5 Errors 3 Max 1 Score -3 CorrectScore 2 TypeOfTrial ShapeTypeRight ShapeTypeLeft CopyingWhichSide Feedback CurrentScore RT Match 3 4 Left INCORRECT! -1 3688 Match 3 3 Left CORRECT 0 17608 Match 6 3 Right CORRECT 1 16807 Match 3 3 Left INCORRECT! -1 16820 Match 4 3 Left INCORRECT! -3 31452	1	2017-03-17 16:17:25 UTC	2017-03-17 16:17:44 UTC	Mozilla/5.0 (Macintosh; Intel Mac OS X 10_12_2) AppleWebKit/602.3.12 (KHTML, like Gecko) Version/10.0.2 Safari/602.3.12	Safari	Mac OS X	Desktop
751	66659	1627	15107	850	35628	3	2.25	Task duration 141941 MaxScore: 3 MeanScore 2.25 TargetString ResponseString RT Feedback 63 63 17279 Correct 71121 11 6766 Incorrect 97 97 8052 Correct 92213 913 12997 Incorrect 249 249 13407 Correct 10420 10420 17507 Correct 1213193 19 3461 Incorrect	1	2017-03-17 16:11:38 UTC	2017-03-17 16:14:31 UTC	Mozilla/5.0 (Macintosh; Intel Mac OS X 10_12_2) AppleWebKit/602.3.12 (KHTML, like Gecko) Version/10.0.2 Safari/602.3.12	Safari	Mac OS X	Desktop
751	66659	1627	15105	855	35628	1	1	Task duration 187187 Batch: Song: OverallScore 1 DifficultyLevel Feedback MovesMade RT 1 CORRECT! 5 163147	1	2017-03-17 16:01:38 UTC	2017-03-17 16:11:16 UTC	Mozilla/5.0 (Macintosh; Intel Mac OS X 10_12_2) AppleWebKit/602.3.12 (KHTML, like Gecko) Version/10.0.2 Safari/602.3.12	Safari	Mac OS X	Desktop
751	66659	1627	15103	844	35628	3	2.5	Task duration 83146 MaxScore 3 MeanScore 2.5 TargetString ResponseString RT Feedback 3086 1478 11987 INCORRECT! 314 837 17536 INCORRECT! 64 64 4904 CORRECT! 190 190 4037 CORRECT! 9385 1580 15570 INCORRECT!	1	2017-03-17 15:55:47 UTC	2017-03-17 15:59:00 UTC	Mozilla/5.0 (Macintosh; Intel Mac OS X 10_12_2) AppleWebKit/602.3.12 (KHTML, like Gecko) Version/10.0.2 Safari/602.3.12	Safari	Mac OS X	Desktop
751	66659	1627	15101	846	35628	12	Attempted 8 Errors 1 Max 4 Score 12 CorrectScore 16	Task duration 95633 OverallScore 12 Attempted 8 Errors 1 Max 4 Score 12 CorrectScore 16 TrialType FeedbackText.text CurrentScore RT Mismatched CORRECT 1 7556 Mismatched CORRECT 2 6656 Mismatched CORRECT 4 8219 Matched CORRECT 6 3949 Matched CORRECT 9 11226 Matched CORRECT 12 12519 Matched CORRECT 16 12527 Mismatched INCORRECT! 12 17577	1	2017-03-17 15:53:15 UTC	2017-03-17 15:53:40 UTC	Mozilla/5.0 (Macintosh; Intel Mac OS X 10_12_2) AppleWebKit/602.3.12 (KHTML, like Gecko) Version/10.0.2 Safari/602.3.12	Safari	Mac OS X	Desktop
751	66659	1627	15099	852	35628	4	Attempted 3 Errors 1 Max 4 Score 4 CorrectScore 8	Task duration: 95020 OverallScore 4 Attempted 3 Errors 1 Max 4 Score 4 CorrectScore 8 TrialType Angle Feedback Score RT Match 90 INCORRECT! -4 13684 Match 90 CORRECT 0 35132 Match 180 CORRECT 4 38371	1	2017-03-17 15:49:27 UTC	2017-03-17 15:52:57 UTC	Mozilla/5.0 (Macintosh; Intel Mac OS X 10_12_2) AppleWebKit/602.3.12 (KHTML, like Gecko) Version/10.0.2 Safari/602.3.12	Safari	Mac OS X	Desktop
751	66659	1627	15097	854	35628	0	0	Task duration 103616 MaxScore 0 MeanScore 0 TargetString ResponseString RT Feedback Focus Lost At 21152 121059 105015 39453 INCORRECT! 534 359 17413 INCORRECT! 151 59 19601 INCORRECT!	1	2017-03-17 15:47:07 UTC	2017-03-17 15:48:47 UTC	Mozilla/5.0 (Macintosh; Intel Mac OS X 10_12_2) AppleWebKit/602.3.12 (KHTML, like Gecko) Version/10.0.2 Safari/602.3.12	Safari	Mac OS X	Desktop
751	66659	1627	15095	849	35628	1	Attempted 1 Errors 0 Max 1 Score 1	Task duration 186497 OverallScore 1 Attempted 1 Errors 0 Max 1 Score 1 OddOneOut Selection Correct Level On Responded RT Score 2 2 CORRECT 1 10681 53736 43055 0	1	2017-03-17 15:41:50 UTC	2017-03-17 15:45:05 UTC	Mozilla/5.0 (Macintosh; Intel Mac OS X 10_12_2) AppleWebKit/602.3.12 (KHTML, like Gecko) Version/10.0.2 Safari/602.3.12	Safari	Mac OS X	Desktop
751	66659	1627	15093	845	35628	-4	CC trials 0 IC trials NaN CI trials 0 II trials 0 CC RT 25956 IC RT NaN CI RT 6083 II RT 23755.5	Task duration = 95429 OverallScore -4 CC trials 0 IC trials NaN CI trials 0 II trials 0 CC RT 25956 IC RT NaN CI RT 6083 II RT 23755.5 Problems CorrectAnswer ProbeText ProbeColour RightProbe LeftProbe ResponseChoice Feedback RT CIR Right BLUE 255 BLUE RED Left INCORRECT! 6083 CCR Right BLUE 255 BLUE RED Left INCORRECT! 25956 IIR Right RED 255 BLUE RED Left INCORRECT! 36861 IIL Left RED 255 RED BL…	1	2017-03-17 15:39:05 UTC	2017-03-17 15:39:09 UTC	Mozilla/5.0 (Macintosh; Intel Mac OS X 10_12_2) AppleWebKit/602.3.12 (KHTML, like Gecko) Version/10.0.2 Safari/602.3.12	Safari	Mac OS X	Desktop
751	66659	1627	15091	847	35628	1		Task duration = 95207 1 out of 5 attempted ProbeText OuterImg InnerImg Response Feedback RT Square is encapsulated by circle Square Circle true INCORRECT! 15625 Square encapsulates circle Square Circle true CORRECT 18616 Square does not contain circle Square Circle false INCORRECT! 15937 Circle encapsulates square Square Circle true CORRECT 7415 Circle contains square Square Circle true CORRECT 4…	1	2017-03-17 15:35:29 UTC	2017-03-17 15:37:11 UTC	Mozilla/5.0 (Macintosh; Intel Mac OS X 10_12_2) AppleWebKit/602.3.12 (KHTML, like Gecko) Version/10.0.2 Safari/602.3.12	Safari	Mac OS X	Desktop
751	66659	1627	15089	848	35628	3	2.33333	Task duration 209205 MaxScore 3 MeanScore 2.3333333333333335 TargetString ResponseString RT Feedback 1424 1424 40102 CORRECT! 151725 151725 35450 CORRECT! 23121911 11122319 27902 INCORRECT! 146 614 31890 INCORRECT! 1215 1215 9363 CORRECT! 1871 1817 36221 INCORRECT!	1	2017-03-17 15:29:40 UTC	2017-03-17 15:31:47 UTC	Mozilla/5.0 (Macintosh; Intel Mac OS X 10_12_2) AppleWebKit/602.3.12 (KHTML, like Gecko) Version/10.0.2 Safari/602.3.12	Safari	Mac OS X	Desktop
751	62692	1627	15111	853	34006	7	5	Task duration 354478 AvgCorrect 5 MaxScore 7 19.gif 1723 Response 1 of 2 Empty 24.gif 787 Token 1 of 4 2.gif 1154 Response 1 of 2 Empty 18.gif 615 Token 2 of 4 19.gif 1743 Response 1 of 2 Empty 2.gif 2847 Token 3 of 4 24.gif 1662 Response 1 of 1 Found ERROR! 13.gif 2647 Response 1 of 2 Empty 8.gif 1082 Token 1 of 3 21.gif 922 Token 2 of 3 13.gif 2286 Token 3 of 3 completed 12.gif 1268 Response 1 …	1	2017-02-11 16:18:28 UTC	2017-02-11 16:24:30 UTC	Mozilla/5.0 (Macintosh; Intel Mac OS X 10_12_2) AppleWebKit/537.36 (KHTML, like Gecko) Chrome/55.0.2883.95 Safari/537.36	Chrome	Mac OS X	Desktop
751	62692	1627	15109	851	34006	29	Attempted 24 Errors 7 Max 6 Score 29 CorrectScore 58	Task duration 95505 OverallScore 29 Attempted 24 Errors 7 Max 6 Score 29 CorrectScore 58 TypeOfTrial ShapeTypeRight ShapeTypeLeft CopyingWhichSide Feedback CurrentScore RT Match 4 4 Left CORRECT 1 3686 Mismatch 6 4 Right CORRECT 2 3480 Mismatch 3 5 Right INCORRECT! 0 2153 Match 4 5 Right CORRECT 2 2913 Mismatch 6 5 Left CORRECT 4 4376 Mismatch 4 5 Right INCORRECT! 1 4567 Mismatch 3 4 Right INCORR…	1	2017-02-11 16:12:48 UTC	2017-02-11 16:14:29 UTC	Mozilla/5.0 (Macintosh; Intel Mac OS X 10_12_2) AppleWebKit/537.36 (KHTML, like Gecko) Chrome/55.0.2883.95 Safari/537.36	Chrome	Mac OS X	Desktop
751	62692	1627	15107	850	34006	4	3.2	Task duration 136498 MaxScore: 4 MeanScore 3.2 TargetString ResponseString RT Feedback 2423 2423 5375 Correct 23316 23316 7578 Correct 113224 3 1709 Incorrect 24612 24612 5371 Correct 519915 519915 8884 Correct 173741 3 2049 Incorrect 108924 108924 8783 Correct 672424 67244 10598 Incorrect	1	2017-02-11 16:08:52 UTC	2017-02-11 16:11:13 UTC	Mozilla/5.0 (Macintosh; Intel Mac OS X 10_12_2) AppleWebKit/537.36 (KHTML, like Gecko) Chrome/55.0.2883.95 Safari/537.36	Chrome	Mac OS X	Desktop
751	62692	1627	15105	855	34006	14	14	Task duration 187291 Batch: Song: OverallScore 14 DifficultyLevel Feedback MovesMade RT 1 CORRECT! 3 61553 2 CORRECT! 3 21830 3 CORRECT! 4 24014 4 CORRECT! 4 28573	1	2017-02-11 15:57:51 UTC	2017-02-11 16:01:03 UTC	Mozilla/5.0 (Macintosh; Intel Mac OS X 10_12_2) AppleWebKit/537.36 (KHTML, like Gecko) Chrome/55.0.2883.95 Safari/537.36	Chrome	Mac OS X	Desktop
751	62692	1627	15103	844	34006	4	4	Task duration 75078 MaxScore 4 MeanScore 4 TargetString ResponseString RT Feedback 4061 4061 4406 CORRECT! 42891 42912 8487 INCORRECT! 2078 2078 3867 CORRECT! 94815 98419 7069 INCORRECT! 7960 7960 4284 CORRECT! 96724 96765 6317 INCORRECT!	1	2017-02-11 15:59:12 UTC	2017-02-11 15:54:41 UTC	Mozilla/5.0 (Macintosh; Intel Mac OS X 10_12_2) AppleWebKit/537.36 (KHTML, like Gecko) Chrome/55.0.2883.95 Safari/537.36	Chrome	Mac OS X	Desktop
751	62692	1627	15101	846	34006	84	Attempted 21 Errors 2 Max 9 Score 84 CorrectScore 97	Task duration 95354 OverallScore 84 Attempted 21 Errors 2 Max 9 Score 84 CorrectScore 97 TrialType FeedbackText.text CurrentScore RT Matched CORRECT 1 3125 Matched CORRECT 2 1880 Matched CORRECT 4 2403 Matched CORRECT 6 1820 Matched CORRECT 9 1687 Mismatched CORRECT 12 1968 Mismatched CORRECT 16 2269 Matched CORRECT 20 3370 Mismatched CORRECT 25 2541 Matched CORRECT 30 2779 Mismatched INCORRECT! …	1	2017-02-11 15:55:38 UTC	2017-02-11 15:51:25 UTC	Mozilla/5.0 (Macintosh; Intel Mac OS X 10_12_2) AppleWebKit/537.36 (KHTML, like Gecko) Chrome/55.0.2883.95 Safari/537.36	Chrome	Mac OS X	Desktop
751	62692	1627	15099	852	34006	78	Attempted 18 Errors 3 Max 10 Score 78 CorrectScore 102	Task duration: 95535 OverallScore 78 Attempted 18 Errors 3 Max 10 Score 78 CorrectScore 102 TrialType Angle Feedback Score RT Mismatch 90 CORRECT 4 2640 Match 270 INCORRECT! 0 3434 Match 180 CORRECT 4 3210 Match 90 CORRECT 8 2856 Mismatch 180 CORRECT 13 2642 Match 90 CORRECT 18 4466 Match 90 CORRECT 24 3598 Match 90 CORRECT 30 3279 Match 180 CORRECT 37 4095 Mismatch 270 CORRECT 44 2987 Mismatch 2…	1	2017-02-11 15:46:22 UTC	2017-02-11 15:54:35 UTC	Mozilla/5.0 (Macintosh; Intel Mac OS X 10_12_2) AppleWebKit/537.36 (KHTML, like Gecko) Chrome/55.0.2883.95 Safari/537.36	Chrome	Mac OS X	Desktop
751	62692	1627	15097	854	34006	4	3.66667	Task duration 96833 MaxScore 4 MeanScore 3.6666666666666665 TargetString ResponseString RT Feedback 61047 61047 4578 CORRECT! 541181 451181 5772 INCORRECT! 15350 31505 6655 INCORRECT! 12115 12115 3069 CORRECT! 51534 51534 5008 CORRECT! 21012134 110841 12944 INCORRECT!	1	2017-02-11 15:42:04 UTC	2017-02-11 15:50:09 UTC	Mozilla/5.0 (Macintosh; Intel Mac OS X 10_12_2) AppleWebKit/537.36 (KHTML, like Gecko) Chrome/55.0.2883.95 Safari/537.36	Chrome	Mac OS X	Desktop
751	62692	1627	15095	849	34006	9	Attempted 17 Errors 4 Max 13 Score 9	Task duration 187309 OverallScore 9 Attempted 17 Errors 4 Max 13 Score 9 OddOneOut Selection Correct Level On Responded RT Score 1 1 CORRECT 1 6519 10075 3556 0 5 5 CORRECT 2 11337 14874 3537 1 4 4 CORRECT 3 16200 25346 9146 2 6 6 CORRECT 4 26617 29034 2417 3 4 4 CORRECT 6 30411 40642 10231 4 8 8 CORRECT 5 41918 47586 5668 5 9 9 CORRECT 7 48920 56297 7377 6 2 9 ERROR!! 8 57584 64394 6810 7 9 9 CO…	1	2017-02-11 15:37:06 UTC	2017-02-11 15:46:51 UTC	Mozilla/5.0 (Macintosh; Intel Mac OS X 10_12_2) AppleWebKit/537.36 (KHTML, like Gecko) Chrome/55.0.2883.95 Safari/537.36	Chrome	Mac OS X	Desktop
751	62692	1627	15093	845	34006	13	CC trials 1 IC trials 0.875 CI trials 0.7777777777777778 II trials 0.125 CC RT 1843 IC RT 2567.125 CI RT 3099.4444444444443 II RT 2264.5	Task duration = 95442 OverallScore 13 CC trials 1 IC trials 0.875 CI trials 0.7777777777777778 II trials 0.125 CC RT 1843 IC RT 2567.125 CI RT 3099.4444444444443 II RT 2264.5 Problems CorrectAnswer ProbeText ProbeColour RightProbe LeftProbe ResponseChoice Feedback RT IIR Right BLUE 16711680 RED BLUE Left INCORRECT! 3273 CIL Left RED 16711680 BLUE RED Right INCORRECT! 3200 ICL Left BLUE 16711680 B…	1	2017-02-11 15:40:20 UTC	2017-02-11 15:41:28 UTC	Mozilla/5.0 (Macintosh; Intel Mac OS X 10_12_2) AppleWebKit/537.36 (KHTML, like Gecko) Chrome/55.0.2883.95 Safari/537.36	Chrome	Mac OS X	Desktop
751	62692	1627	15091	847	34006	5		Task duration = 95688 5 out of 13 attempted ProbeText OuterImg InnerImg Response Feedback RT Square is not smaller than circle Square Circle true CORRECT 10405 Square does not contain circle Square Circle true CORRECT 4986 Square contains circle Square Circle false CORRECT 5248 Square is not contained by circle Square Circle false CORRECT 5854 Circle is not bigger than square Square Circle false …	1	2017-02-11 15:29:24 UTC	2017-02-11 15:37:37 UTC	Mozilla/5.0 (Macintosh; Intel Mac OS X 10_12_2) AppleWebKit/537.36 (KHTML, like Gecko) Chrome/55.0.2883.95 Safari/537.36	Chrome	Mac OS X	Desktop
751	62692	1627	15089	848	34006	5	3.83333	Task duration 108786 MaxScore 5 MeanScore 3.8333333333333335 TargetString ResponseString RT Feedback 616 616 4845 CORRECT! 92516 92516 5127 CORRECT! 523325 523325 7881 CORRECT! 310201122 310112022 5973 INCORRECT! 151698 151698 4340 CORRECT! 2411689 2411689 4396 CORRECT! 212201425 212142025 7875 INCORRECT! 201519816 201519816 7398 CORRECT! 1425517197 1425571719 6542 INCORRECT!	1	2017-02-11 15:30:54 UTC	2017-02-11 15:26:59 UTC	Mozilla/5.0 (Macintosh; Intel Mac OS X 10_12_2) AppleWebKit/537.36 (KHTML, like Gecko) Chrome/55.0.2883.95 Safari/537.36	Chrome	Mac OS X	Desktop
751	61823	1627	15099	852	33442	17	Attempted 8 Errors 2 Max 6 Score 17 CorrectScore 30	Task duration: 95829 OverallScore 17 Attempted 8 Errors 2 Max 6 Score 17 CorrectScore 30 TrialType Angle Feedback Score RT Match 90 CORRECT 4 8931 Mismatch 270 CORRECT 8 6667 Mismatch 90 CORRECT 13 6865 Match 270 CORRECT 18 7127 Match 180 INCORRECT! 12 13999 Match 90 CORRECT 18 11320 Match 90 CORRECT 24 10123 Match 90 INCORRECT! 17 14654	1	2017-01-27 22:13:08 UTC	2017-01-27 22:15:17 UTC	Mozilla/5.0 (Macintosh; Intel Mac OS X 10_12_2) AppleWebKit/537.36 (KHTML, like Gecko) Chrome/55.0.2883.95 Safari/537.36	Chrome	Mac OS X	Desktop
751	61823	1627	15097	854	33442	4	4	Task duration 177622 MaxScore 4 MeanScore 4 TargetString ResponseString RT Feedback 91348 91348 10468 CORRECT! 2411108 82659 31898 INCORRECT! 1301011 1301011 17735 CORRECT! 8141012 8121513 42067 INCORRECT! 30115 03515 24825 INCORRECT!	1	2017-01-27 22:09:41 UTC	2017-01-27 22:12:19 UTC	Mozilla/5.0 (Macintosh; Intel Mac OS X 10_12_2) AppleWebKit/537.36 (KHTML, like Gecko) Chrome/55.0.2883.95 Safari/537.36	Chrome	Mac OS X	Desktop
751	61823	1627	15095	849	33442	9	Attempted 9 Errors 0 Max 9 Score 9	Task duration 187461 OverallScore 9 Attempted 9 Errors 0 Max 9 Score 9 OddOneOut Selection Correct Level On Responded RT Score 3 3 CORRECT 1 20379 25146 4767 0 5 5 CORRECT 2 26526 33618 7092 1 2 2 CORRECT 3 34949 49050 14101 2 1 1 CORRECT 4 50357 59626 9269 3 5 5 CORRECT 7 60893 121672 60779 4 6 6 CORRECT 6 122979 132881 9902 5 4 4 CORRECT 5 134231 144344 10113 6 7 7 CORRECT 8 145695 186911 41216…	1	2017-01-27 21:59:51 UTC	2017-01-27 22:08:17 UTC	Mozilla/5.0 (Macintosh; Intel Mac OS X 10_12_2) AppleWebKit/537.36 (KHTML, like Gecko) Chrome/55.0.2883.95 Safari/537.36	Chrome	Mac OS X	Desktop
751	61823	1627	15093	845	33442	2	CC trials 1 IC trials 0.6666666666666666 CI trials 0.5 II trials 0 CC RT 11903 IC RT 7369.333333333333 CI RT 5698.5 II RT 7638.5	Task duration = 95447 OverallScore 2 CC trials 1 IC trials 0.6666666666666666 CI trials 0.5 II trials 0 CC RT 11903 IC RT 7369.333333333333 CI RT 5698.5 II RT 7638.5 Problems CorrectAnswer ProbeText ProbeColour RightProbe LeftProbe ResponseChoice Feedback RT CIL Left RED 16711680 BLUE RED Right INCORRECT! 3432 ICR Right RED 255 BLUE RED Right CORRECT 8126 IIR Right BLUE 16711680 RED BLUE Left INC…	1	2017-01-27 22:02:26 UTC	2017-01-27 21:58:18 UTC	Mozilla/5.0 (Macintosh; Intel Mac OS X 10_12_2) AppleWebKit/537.36 (KHTML, like Gecko) Chrome/55.0.2883.95 Safari/537.36	Chrome	Mac OS X	Desktop
751	61823	1627	15091	847	33442	5		Task duration = 95700 5 out of 9 attempted ProbeText OuterImg InnerImg Response Feedback RT Square is not contained by circle Square Circle true CORRECT 7736 Circle is bigger than square Square Circle false CORRECT 5795 Square is smaller than circle Square Circle false CORRECT 4492 Square encapsulates circle Square Circle false INCORRECT! 10101 Circle encapsulates square Square Circle true INCORR…	1	2017-01-27 21:52:55 UTC	2017-01-27 22:00:26 UTC	Mozilla/5.0 (Macintosh; Intel Mac OS X 10_12_2) AppleWebKit/537.36 (KHTML, like Gecko) Chrome/55.0.2883.95 Safari/537.36	Chrome	Mac OS X	Desktop
751	61823	1627	15089	848	33442	6	3.71429	Task duration 237164 MaxScore 6 MeanScore 3.7142857142857144 TargetString ResponseString RT Feedback 25 25 12828 CORRECT! 8171 8117 8772 INCORRECT! 1624 1624 5579 CORRECT! 13184 13184 6860 CORRECT! 431117 431117 7117 CORRECT! 41751923 41752319 73684 INCORRECT! 2262516 2262516 13105 CORRECT! 61718311 61718311 11083 CORRECT! 7221121824 7221121824 14756 CORRECT! 2115716171922 2115716172219 26822 INC…	1	2017-01-27 21:51:47 UTC	2017-01-27 21:55:59 UTC	Mozilla/5.0 (Macintosh; Intel Mac OS X 10_12_2) AppleWebKit/537.36 (KHTML, like Gecko) Chrome/55.0.2883.95 Safari/537.36	Chrome	Mac OS X	Desktop
751	60449	1627	15111	853	32789	3	3	Task duration 58845 AvgCorrect 3 MaxScore 3 13.gif 1710 Token 1 of 4 25.gif 2148 Response 1 of 3 Empty 15.gif 1382 Response 2 of 3 Empty 2.gif 1428 Token 2 of 4 13.gif 2610 Response 1 of 2 Found ERROR! 20.gif 2065 Token 1 of 3 23.gif 2056 Response 1 of 2 Empty 5.gif 1703 Token 2 of 3 23.gif 4494 Token 3 of 3 completed 20.gif 2363 Response 1 of 3 Empty 12.gif 1854 Response 2 of 3 Empty 8.gif 1279 …	1	2017-01-17 01:29:27 UTC	2017-01-17 01:35:22 UTC	Mozilla/5.0 (Macintosh; Intel Mac OS X 10_12_2) AppleWebKit/537.36 (KHTML, like Gecko) Chrome/55.0.2883.95 Safari/537.36	Chrome	Mac OS X	Desktop
751	60449	1627	15109	851	32789	33	Attempted 14 Errors 2 Max 6 Score 33 CorrectScore 42	Task duration 95087 OverallScore 33 Attempted 14 Errors 2 Max 6 Score 33 CorrectScore 42 TypeOfTrial ShapeTypeRight ShapeTypeLeft CopyingWhichSide Feedback CurrentScore RT Match 5 6 Right CORRECT 1 4837 Match 5 4 Right CORRECT 2 5383 Match 4 6 Left CORRECT 4 4493 Mismatch 4 5 Right CORRECT 6 6632 Match 4 4 Left CORRECT 9 5794 Match 5 3 Left CORRECT 12 1830 Mismatch 5 3 Right INCORRECT! 8 6180 Mis…	1	2017-01-17 01:31:51 UTC	2017-01-17 01:28:43 UTC	Mozilla/5.0 (Macintosh; Intel Mac OS X 10_12_2) AppleWebKit/537.36 (KHTML, like Gecko) Chrome/55.0.2883.95 Safari/537.36	Chrome	Mac OS X	Desktop
751	60449	1627	15107	850	32789	4	2.8	Task duration 118832 MaxScore: 4 MeanScore 2.8 TargetString ResponseString RT Feedback 1215 1215 3753 Correct 202324 202324 6425 Correct 2115202 2 2816 Incorrect 14211 141 4168 Incorrect 421 421 4230 Correct 172015 172015 5968 Correct 1218164 1218164 9203 Correct 161013225 10 3717 Incorrect	1	2017-01-17 01:25:32 UTC	2017-01-17 01:22:47 UTC	Mozilla/5.0 (Macintosh; Intel Mac OS X 10_12_2) AppleWebKit/537.36 (KHTML, like Gecko) Chrome/55.0.2883.95 Safari/537.36	Chrome	Mac OS X	Desktop
751	60449	1627	15105	855	32789	17	17	Task duration 187288 Batch: Song: OverallScore 17 DifficultyLevel Feedback MovesMade RT 1 CORRECT! 3 21391 2 CORRECT! 3 17112 3 CORRECT! 4 33687 4 CORRECT! 4 26213 5 CORRECT! 7 42904	1	2017-01-17 01:19:53 UTC	2017-01-17 01:18:40 UTC	Mozilla/5.0 (Macintosh; Intel Mac OS X 10_12_2) AppleWebKit/537.36 (KHTML, like Gecko) Chrome/55.0.2883.95 Safari/537.36	Chrome	Mac OS X	Desktop
751	60449	1627	15103	844	32789	5	4.5	Task duration 98678 MaxScore 5 MeanScore 4.5 TargetString ResponseString RT Feedback 8705 8705 4370 CORRECT! 08271 08271 4987 CORRECT! 086795 086759 11201 INCORRECT! 89126 89123 6902 INCORRECT! 3412 3412 4104 CORRECT! 47812 47812 9321 CORRECT! 825461 875412 8117 INCORRECT!	1	2017-01-17 01:11:23 UTC	2017-01-17 01:13:08 UTC	Mozilla/5.0 (Macintosh; Intel Mac OS X 10_12_2) AppleWebKit/537.36 (KHTML, like Gecko) Chrome/55.0.2883.95 Safari/537.36	Chrome	Mac OS X	Desktop
751	60449	1627	15101	846	32789	72	Attempted 16 Errors 0 Max 8 Score 72 CorrectScore 72	Task duration 95758 OverallScore 72 Attempted 16 Errors 0 Max 8 Score 72 CorrectScore 72 TrialType FeedbackText.text CurrentScore RT Matched CORRECT 1 2714 Matched CORRECT 2 1800 Matched CORRECT 4 1517 Matched CORRECT 6 2420 Matched CORRECT 9 2255 Mismatched CORRECT 12 4767 Matched CORRECT 16 7089 Mismatched CORRECT 20 5629 Matched CORRECT 25 5436 Mismatched CORRECT 30 3964 Matched CORRECT 36 743…	1	2017-01-17 01:13:00 UTC	2017-01-17 01:09:20 UTC	Mozilla/5.0 (Macintosh; Intel Mac OS X 10_12_2) AppleWebKit/537.36 (KHTML, like Gecko) Chrome/55.0.2883.95 Safari/537.36	Chrome	Mac OS X	Desktop
751	60449	1627	15099	852	32789	23	Attempted 11 Errors 3 Max 6 Score 23 CorrectScore 40	Task duration: 95545 OverallScore 23 Attempted 11 Errors 3 Max 6 Score 23 CorrectScore 40 TrialType Angle Feedback Score RT Mismatch 270 CORRECT 4 3994 Match 180 CORRECT 8 4756 Match 180 CORRECT 13 4583 Match 180 CORRECT 18 5822 Mismatch 180 INCORRECT! 12 10086 Match 90 INCORRECT! 6 8509 Match 90 INCORRECT! 1 10944 Match 90 CORRECT 6 7951 Match 90 CORRECT 11 5541 Mismatch 270 CORRECT 17 6558 Matc…	1	2017-01-17 01:09:32 UTC	2017-01-17 01:05:50 UTC	Mozilla/5.0 (Macintosh; Intel Mac OS X 10_12_2) AppleWebKit/537.36 (KHTML, like Gecko) Chrome/55.0.2883.95 Safari/537.36	Chrome	Mac OS X	Desktop
751	60449	1627	15097	854	32789	4	3.66667	Task duration 622522 MaxScore 4 MeanScore 3.6666666666666665 TargetString ResponseString RT Feedback 010113 01018 10317 INCORRECT! 11015 11015 4926 CORRECT! 012411 012411 6765 CORRECT! 615285 615508 8814 INCORRECT! 2131215 2131215 13109 CORRECT! Focus Lost At 403220 Focus Lost At 523735 574143 3105915 519740 INCORRECT!	1	2017-01-17 00:50:02 UTC	2017-01-17 01:05:19 UTC	Mozilla/5.0 (Macintosh; Intel Mac OS X 10_12_2) AppleWebKit/537.36 (KHTML, like Gecko) Chrome/55.0.2883.95 Safari/537.36	Chrome	Mac OS X	Desktop
751	60449	1627	15095	849	32789	6	Attempted 12 Errors 3 Max 9 Score 6	Task duration 187003 OverallScore 6 Attempted 12 Errors 3 Max 9 Score 6 OddOneOut Selection Correct Level On Responded RT Score 7 7 CORRECT 1 7593 10295 2702 0 8 3 ERROR!! 2 11712 47634 35922 1 1 1 CORRECT 2 48959 59840 10881 0 1 1 CORRECT 3 61128 76109 14981 1 7 7 CORRECT 4 77415 84775 7360 2 6 6 CORRECT 5 86088 92398 6310 3 2 2 CORRECT 8 93828 104856 11028 4 9 9 CORRECT 7 106122 113030 6908 5 8…	1	2017-01-17 00:50:22 UTC	2017-01-17 00:53:00 UTC	Mozilla/5.0 (Macintosh; Intel Mac OS X 10_12_2) AppleWebKit/537.36 (KHTML, like Gecko) Chrome/55.0.2883.95 Safari/537.36	Chrome	Mac OS X	Desktop
751	60449	1627	15093	845	32789	7	CC trials 1 IC trials 0.2857142857142857 CI trials 1 II trials 0.16666666666666666 CC RT 2026.2857142857142 IC RT 3464.8571428571427 CI RT 3381.5714285714284 II RT 3250.8333333333335	Task duration = 95475 OverallScore 7 CC trials 1 IC trials 0.2857142857142857 CI trials 1 II trials 0.16666666666666666 CC RT 2026.2857142857142 IC RT 3464.8571428571427 CI RT 3381.5714285714284 II RT 3250.8333333333335 Problems CorrectAnswer ProbeText ProbeColour RightProbe LeftProbe ResponseChoice Feedback RT ICR Right BLUE 16711680 RED BLUE Right CORRECT 3947 IIR Right BLUE 16711680 RED BLUE L…	1	2017-01-17 00:45:52 UTC	2017-01-17 00:47:33 UTC	Mozilla/5.0 (Macintosh; Intel Mac OS X 10_12_2) AppleWebKit/537.36 (KHTML, like Gecko) Chrome/55.0.2883.95 Safari/537.36	Chrome	Mac OS X	Desktop
751	60449	1627	15091	847	32789	8		Task duration = 95564 8 out of 14 attempted ProbeText OuterImg InnerImg Response Feedback RT Circle is contained by square Square Circle false CORRECT 6236 Circle is not encapsulated by square Square Circle true INCORRECT! 7499 Circle contains square Square Circle false CORRECT 4404 Circle is not contained by square Square Circle true CORRECT 5289 Circle is encapsulated by square Square Circle fa…	1	2017-01-17 00:42:33 UTC	2017-01-17 00:39:26 UTC	Mozilla/5.0 (Macintosh; Intel Mac OS X 10_12_2) AppleWebKit/537.36 (KHTML, like Gecko) Chrome/55.0.2883.95 Safari/537.36	Chrome	Mac OS X	Desktop
751	60449	1627	15089	848	32789	6	4.16667	Task duration 138201 MaxScore 6 MeanScore 4.166666666666667 TargetString ResponseString RT Feedback 2024 2024 3661 CORRECT! 25197 25197 4702 CORRECT! 2571924 2571924 7369 CORRECT! 142511246 142511246 8215 CORRECT! 93172514 97312514 13713 INCORRECT! 16174612 16174612 6990 CORRECT! 92212574 92212574 9229 CORRECT! 1521242591117 1521172425119 17656 INCORRECT! 123623149 123236149 8151 INCORRECT!	1	2017-01-17 00:38:19 UTC	2017-01-17 00:41:46 UTC	Mozilla/5.0 (Macintosh; Intel Mac OS X 10_12_2) AppleWebKit/537.36 (KHTML, like Gecko) Chrome/55.0.2883.95 Safari/537.36	Chrome	Mac OS X	Desktop
751	59287	1627	15111	853	32157	5	4.66667	Task duration 108630 AvgCorrect 4.666666666666667 MaxScore 5 6.gif 2679 Response 1 of 3 Empty 18.gif 1719 Response 2 of 3 Empty 23.gif 1105 Token 1 of 4 6.gif 2094 Token 2 of 4 18.gif 725 Response 1 of 2 Empty 25.gif 1739 Token 3 of 4 18.gif 806 Token 4 of 4 completed 16.gif 2174 Token 1 of 5 17.gif 3223 Response 1 of 4 Empty 1.gif 4842 Response 2 of 4 Empty 18.gif 802 Response 3 of 4 Empty 13.gi…	1	2016-12-21 01:49:21 UTC	2016-12-21 01:47:07 UTC	Mozilla/5.0 (Macintosh; Intel Mac OS X 10_12_1) AppleWebKit/537.36 (KHTML, like Gecko) Chrome/55.0.2883.95 Safari/537.36	Chrome	Mac OS X	Desktop
751	59287	1627	15109	851	32157	-4	Attempted 18 Errors 10 Max 3 Score -4 CorrectScore 12	Task duration 94942 OverallScore -4 Attempted 18 Errors 10 Max 3 Score -4 CorrectScore 12 TypeOfTrial ShapeTypeRight ShapeTypeLeft CopyingWhichSide Feedback CurrentScore RT Match 6 4 Right INCORRECT! -1 4883 Match 5 5 Left INCORRECT! -2 4998 Mismatch 5 6 Left INCORRECT! -3 3393 Match 4 3 Left CORRECT -2 4340 Mismatch 3 5 Right INCORRECT! -3 2134 Mismatch 6 4 Left CORRECT -2 4571 Mismatch 4 6 Left…	1	2016-12-21 01:43:29 UTC	2016-12-21 01:44:09 UTC	Mozilla/5.0 (Macintosh; Intel Mac OS X 10_12_1) AppleWebKit/537.36 (KHTML, like Gecko) Chrome/55.0.2883.95 Safari/537.36	Chrome	Mac OS X	Desktop
751	59287	1627	15107	850	32157	3	2.5	Task duration 117049 MaxScore: 3 MeanScore 2.5 TargetString ResponseString RT Feedback 1013 1013 6603 Correct 4245 5 2573 Incorrect 76 76 12833 Correct 24212 24212 10278 Correct 1316201 1320 4494 Incorrect 1103 1103 10002 Correct 23514 25 4158 Incorrect	1	2016-12-21 01:38:10 UTC	2016-12-21 01:37:19 UTC	Mozilla/5.0 (Macintosh; Intel Mac OS X 10_12_1) AppleWebKit/537.36 (KHTML, like Gecko) Chrome/55.0.2883.95 Safari/537.36	Chrome	Mac OS X	Desktop
751	59287	1627	15105	855	32157	19	19	Task duration 186753 Batch: Song: OverallScore 19 DifficultyLevel Feedback MovesMade RT 1 CORRECT! 3 26427 2 CORRECT! 3 18989 3 CORRECT! 4 21436 4 CORRECT! 4 72422 5 CORRECT! 5 34841	1	2016-12-21 01:28:50 UTC	2016-12-21 01:32:11 UTC	Mozilla/5.0 (Macintosh; Intel Mac OS X 10_12_1) AppleWebKit/537.36 (KHTML, like Gecko) Chrome/55.0.2883.95 Safari/537.36	Chrome	Mac OS X	Desktop
751	59287	1627	15103	844	32157	5	4.25	Task duration 111028 MaxScore 5 MeanScore 4.25 TargetString ResponseString RT Feedback 3750 6750 15710 INCORRECT! 134 134 4820 CORRECT! 6495 6495 6208 CORRECT! 12863 12863 6689 CORRECT! 235041 634101 13108 INCORRECT! 42397 42397 6692 CORRECT! 607254 605240 9483 INCORRECT!	1	2016-12-21 01:24:24 UTC	2016-12-21 01:23:23 UTC	Mozilla/5.0 (Macintosh; Intel Mac OS X 10_12_1) AppleWebKit/537.36 (KHTML, like Gecko) Chrome/55.0.2883.95 Safari/537.36	Chrome	Mac OS X	Desktop
751	59287	1627	15101	846	32157	56	Attempted 16 Errors 1 Max 8 Score 56 CorrectScore 64	Task duration 95464 OverallScore 56 Attempted 16 Errors 1 Max 8 Score 56 CorrectScore 64 TrialType FeedbackText.text CurrentScore RT Mismatched CORRECT 1 2072 Mismatched CORRECT 2 1861 Matched CORRECT 4 3000 Matched CORRECT 6 2666 Mismatched CORRECT 9 2314 Mismatched CORRECT 12 2474 Matched CORRECT 16 6011 Mismatched CORRECT 20 2895 Mismatched CORRECT 25 7648 Matched CORRECT 30 6961 Mismatched CO…	1	2016-12-21 01:16:31 UTC	2016-12-21 01:18:10 UTC	Mozilla/5.0 (Macintosh; Intel Mac OS X 10_12_1) AppleWebKit/537.36 (KHTML, like Gecko) Chrome/55.0.2883.95 Safari/537.36	Chrome	Mac OS X	Desktop
751	59287	1627	15099	852	32157	53	Attempted 13 Errors 2 Max 8 Score 53 CorrectScore 66	Task duration: 95401 OverallScore 53 Attempted 13 Errors 2 Max 8 Score 53 CorrectScore 66 TrialType Angle Feedback Score RT Mismatch 270 CORRECT 4 4383 Match 270 CORRECT 8 5419 Mismatch 90 CORRECT 13 4526 Match 90 CORRECT 18 3290 Match 180 CORRECT 24 7079 Mismatch 270 INCORRECT! 18 5509 Mismatch 180 CORRECT 24 5695 Match 180 CORRECT 30 8218 Mismatch 270 INCORRECT! 23 8041 Match 90 CORRECT 30 7169…	1	2016-12-21 01:15:29 UTC	2016-12-21 01:16:54 UTC	Mozilla/5.0 (Macintosh; Intel Mac OS X 10_12_1) AppleWebKit/537.36 (KHTML, like Gecko) Chrome/55.0.2883.95 Safari/537.36	Chrome	Mac OS X	Desktop
751	59287	1627	15097	854	32157	3	3	Task duration 55467 MaxScore 3 MeanScore 3 TargetString ResponseString RT Feedback 129810 121386 5218 INCORRECT! 1165 1165 2628 CORRECT! 13794 137114 6605 INCORRECT! 467 457 3573 INCORRECT!	1	2016-12-21 01:06:39 UTC	2016-12-21 01:07:39 UTC	Mozilla/5.0 (Macintosh; Intel Mac OS X 10_12_1) AppleWebKit/537.36 (KHTML, like Gecko) Chrome/55.0.2883.95 Safari/537.36	Chrome	Mac OS X	Desktop
751	59287	1627	15095	849	32157	3	Attempted 13 Errors 5 Max 8 Score 3	Task duration 187143 OverallScore 3 Attempted 13 Errors 5 Max 8 Score 3 OddOneOut Selection Correct Level On Responded RT Score 5 5 CORRECT 1 11663 15042 3379 0 4 4 CORRECT 2 16368 20810 4442 1 6 6 CORRECT 3 22066 35527 13461 2 6 6 CORRECT 4 36791 39992 3201 3 2 2 CORRECT 6 41286 49178 7892 4 7 7 CORRECT 5 50494 54470 3976 5 8 5 ERROR!! 7 55795 69873 14078 6 5 5 CORRECT 8 71299 80819 9520 5 1 8 E…	1	2016-12-21 00:59:02 UTC	2016-12-21 01:05:10 UTC	Mozilla/5.0 (Macintosh; Intel Mac OS X 10_12_1) AppleWebKit/537.36 (KHTML, like Gecko) Chrome/55.0.2883.95 Safari/537.36	Chrome	Mac OS X	Desktop
751	59287	1627	15093	845	32157	10	CC trials 0.8571428571428571 IC trials 0.5714285714285714 CI trials 1 II trials 0.2857142857142857 CC RT 2832.5714285714284 IC RT 3320.4285714285716 CI RT 2838.8571428571427 II RT 2870.5714285714284	Task duration = 95822 OverallScore 10 CC trials 0.8571428571428571 IC trials 0.5714285714285714 CI trials 1 II trials 0.2857142857142857 CC RT 2832.5714285714284 IC RT 3320.4285714285716 CI RT 2838.8571428571427 II RT 2870.5714285714284 Problems CorrectAnswer ProbeText ProbeColour RightProbe LeftProbe ResponseChoice Feedback RT CCL Left RED 16711680 BLUE RED Left CORRECT 3577 ICR Right BLUE 16711…	1	2016-12-21 00:53:49 UTC	2016-12-21 00:55:29 UTC	Mozilla/5.0 (Macintosh; Intel Mac OS X 10_12_1) AppleWebKit/537.36 (KHTML, like Gecko) Chrome/55.0.2883.95 Safari/537.36	Chrome	Mac OS X	Desktop
751	59287	1627	15091	847	32157	6		Task duration = 95559 6 out of 12 attempted ProbeText OuterImg InnerImg Response Feedback RT Square does not contain circle Square Circle true CORRECT 3607 Circle is bigger than square Square Circle false CORRECT 10546 Square is encapsulated by circle Square Circle true CORRECT 6523 Circle encapsulates square Square Circle false INCORRECT! 7998 Square does not contain circle Square Circle false C…	1	2016-12-21 00:51:11 UTC	2016-12-21 00:53:07 UTC	Mozilla/5.0 (Macintosh; Intel Mac OS X 10_12_1) AppleWebKit/537.36 (KHTML, like Gecko) Chrome/55.0.2883.95 Safari/537.36	Chrome	Mac OS X	Desktop
751	59287	1627	15089	848	32157	5	3.66667	Task duration 95669 MaxScore 5 MeanScore 3.6666666666666665 TargetString ResponseString RT Feedback 172 172 2983 CORRECT! 232219 232219 3213 CORRECT! 1324187 1324187 4725 CORRECT! 82531423 82514233 5854 INCORRECT! 16231213 16231213 4025 CORRECT! 19223179 19172239 5941 INCORRECT! 24108 24108 4007 CORRECT! 1721121415 1721121415 5369 CORRECT! 154233208 154233820 7092 INCORRECT!	1	2016-12-21 00:45:02 UTC	2016-12-21 00:47:58 UTC	Mozilla/5.0 (Macintosh; Intel Mac OS X 10_12_1) AppleWebKit/537.36 (KHTML, like Gecko) Chrome/55.0.2883.95 Safari/537.36	Chrome	Mac OS X	Desktop
751	69309	1627	15111	853	38469	4	3.66667	Task duration 140887 AvgCorrect 3.6666666666666665 MaxScore 4 17.gif 9214 Response 1 of 4 Empty 15.gif 1558 Response 2 of 4 Empty 13.gif 1161 Response 3 of 4 Empty 19.gif 941 Token 1 of 4 13.gif 8760 Token 2 of 4 15.gif 4162 Token 3 of 4 17.gif 1540 Token 4 of 4 completed 14.gif 11903 Response 1 of 0 Empty 20.gif 2174 Response 2 of 0 Empty 12.gif 1020 Response 3 of 0 Empty 23.gif 1008 Response 4 …	1		2017-07-17 18:18:57 UTC	2017-07-17 18:21:26 UTC	Mozilla/5.0 (Macintosh; Intel Mac OS X 10_12_5) AppleWebKit/603.2.4 (KHTML, like Gecko) Version/10.1.1 Safari/603.2.4	Safari	Mac OS X
751	69309	1627	15109	851	38469	3	Attempted 15 Errors 6 Max 3 Score 3 CorrectScore 15	Task duration 95637 OverallScore 3 Attempted 15 Errors 6 Max 3 Score 3 CorrectScore 15 TypeOfTrial ShapeTypeRight ShapeTypeLeft CopyingWhichSide Feedback CurrentScore RT Mismatch 6 3 Left CORRECT 1 4833 Mismatch 5 5 Right INCORRECT! 0 2925 Match 5 3 Right INCORRECT! -1 5618 Match 3 6 Left CORRECT 0 7672 Mismatch 5 3 Left INCORRECT! -1 6341 Match 5 5 Right CORRECT 0 4770 Match 4 5 Right INCORRECT!…	1		2017-07-17 18:17:46 UTC	2017-07-17 18:18:36 UTC	Mozilla/5.0 (Macintosh; Intel Mac OS X 10_12_5) AppleWebKit/603.2.4 (KHTML, like Gecko) Version/10.1.1 Safari/603.2.4	Safari	Mac OS X
751	69309	1627	15107	850	38469	3	2.75	Task duration 135674 MaxScore: 3 MeanScore 2.75 TargetString ResponseString RT Feedback 1224 1224 7930 Correct 132017 132017 8949 Correct 11162024 1124 5482 Incorrect 24110 24110 12308 Correct 214522 21422 8844 Incorrect 17224 17224 12717 Correct 592218 5918 9533 Incorrect	1		2017-07-17 18:14:14 UTC	2017-07-17 18:17:30 UTC	Mozilla/5.0 (Macintosh; Intel Mac OS X 10_12_5) AppleWebKit/603.2.4 (KHTML, like Gecko) Version/10.1.1 Safari/603.2.4	Safari	Mac OS X
751	69309	1627	15105	855	38469	0	0	Task duration 187466 Batch: Song: OverallScore 0 DifficultyLevel Feedback MovesMade RT 1 Failed! 6 73829 1 Failed! 6 100275	1		2017-07-17 18:11:28 UTC	2017-07-17 18:13:49 UTC	Mozilla/5.0 (Macintosh; Intel Mac OS X 10_12_5) AppleWebKit/603.2.4 (KHTML, like Gecko) Version/10.1.1 Safari/603.2.4	Safari	Mac OS X
751	69309	1627	15103	844	38469	4	3.5	Task duration 94846 MaxScore 4 MeanScore 3.5 TargetString ResponseString RT Feedback 2785 0123 34322 INCORRECT! 935 935 3204 CORRECT! 4690 4690 3064 CORRECT! 47516 47169 13572 INCORRECT! 0638 6684 7873 INCORRECT!	1		2017-07-17 18:09:16 UTC	2017-07-17 18:10:56 UTC	Mozilla/5.0 (Macintosh; Intel Mac OS X 10_12_5) AppleWebKit/603.2.4 (KHTML, like Gecko) Version/10.1.1 Safari/603.2.4	Safari	Mac OS X
751	69309	1627	15101	846	38469	28	Attempted 16 Errors 3 Max 5 Score 28 CorrectScore 39	Task duration 95715 OverallScore 28 Attempted 16 Errors 3 Max 5 Score 28 CorrectScore 39 TrialType FeedbackText.text CurrentScore RT Matched CORRECT 1 3839 Mismatched INCORRECT! 0 3075 Matched CORRECT 1 3645 Mismatched CORRECT 2 1559 Matched CORRECT 4 2095 Mismatched CORRECT 6 2827 Matched CORRECT 9 4892 Matched CORRECT 12 3941 Mismatched CORRECT 16 2794 Mismatched CORRECT 20 6800 Mismatched INCO…	1		2017-07-17 18:02:43 UTC	2017-07-17 18:09:02 UTC	Mozilla/5.0 (Macintosh; Intel Mac OS X 10_12_5) AppleWebKit/603.2.4 (KHTML, like Gecko) Version/10.1.1 Safari/603.2.4	Safari	Mac OS X
751	69309	1627	15099	852	38469	18	Attempted 14 Errors 5 Max 6 Score 18 CorrectScore 45	Task duration: 95665 OverallScore 18 Attempted 14 Errors 5 Max 6 Score 18 CorrectScore 45 TrialType Angle Feedback Score RT Match 90 CORRECT 4 7051 Mismatch 270 CORRECT 8 5190 Match 270 INCORRECT! 3 3608 Match 180 CORRECT 8 6709 Match 180 CORRECT 13 5722 Match 90 CORRECT 19 6293 Mismatch 270 INCORRECT! 13 10686 Match 270 INCORRECT! 7 3683 Mismatch 90 INCORRECT! 2 2809 Match 270 CORRECT 7 4302 Mis…	1		2017-07-17 18:04:14 UTC	2017-07-17 18:02:28 UTC	Mozilla/5.0 (Macintosh; Intel Mac OS X 10_12_5) AppleWebKit/603.2.4 (KHTML, like Gecko) Version/10.1.1 Safari/603.2.4	Safari	Mac OS X
751	69309	1627	15097	854	38469	3	3	Task duration 74856 MaxScore 3 MeanScore 3 TargetString ResponseString RT Feedback 144010 14806 7314 INCORRECT! 6144 6144 4773 CORRECT! 24015 28010 5649 INCORRECT! 924 924 5207 CORRECT! 152144 62414 5354 INCORRECT!	1		2017-07-17 18:02:31 UTC	2017-07-17 18:00:25 UTC	Mozilla/5.0 (Macintosh; Intel Mac OS X 10_12_5) AppleWebKit/603.2.4 (KHTML, like Gecko) Version/10.1.1 Safari/603.2.4	Safari	Mac OS X
751	69309	1627	15095	849	38469	4	Attempted 20 Errors 8 Max 12 Score 4	Task duration 187486 OverallScore 4 Attempted 20 Errors 8 Max 12 Score 4 OddOneOut Selection Correct Level On Responded RT Score 7 7 CORRECT 1 7161 11298 4137 0 6 6 CORRECT 2 12674 19362 6688 1 2 2 CORRECT 3 20670 28545 7875 2 7 7 CORRECT 4 29875 32986 3111 3 7 7 CORRECT 5 34343 38442 4099 4 6 6 CORRECT 7 39854 46106 6252 5 6 2 ERROR!! 7 47422 57314 9892 6 8 5 ERROR!! 7 58673 69123 10450 5 6 6 CO…	1		2017-07-17 17:59:34 UTC	2017-07-17 17:58:30 UTC	Mozilla/5.0 (Macintosh; Intel Mac OS X 10_12_5) AppleWebKit/603.2.4 (KHTML, like Gecko) Version/10.1.1 Safari/603.2.4	Safari	Mac OS X
751	69309	1627	15093	845	38469	2	CC trials 1 IC trials 0.09090909090909091 CI trials 0.9166666666666666 II trials 0 CC RT 1518.6666666666667 IC RT 1599.1818181818182 CI RT 1772 II RT 1825.2727272727273	Task duration = 95662 OverallScore 2 CC trials 1 IC trials 0.09090909090909091 CI trials 0.9166666666666666 II trials 0 CC RT 1518.6666666666667 IC RT 1599.1818181818182 CI RT 1772 II RT 1825.2727272727273 Problems CorrectAnswer ProbeText ProbeColour RightProbe LeftProbe ResponseChoice Feedback RT CIR Right BLUE 255 BLUE RED Right CORRECT 2589 IIR Right RED 255 BLUE RED Left INCORRECT! 2435 IIL L…	1		2017-07-17 17:57:56 UTC	2017-07-17 17:59:16 UTC	Mozilla/5.0 (Macintosh; Intel Mac OS X 10_12_5) AppleWebKit/603.2.4 (KHTML, like Gecko) Version/10.1.1 Safari/603.2.4	Safari	Mac OS X
751	69309	1627	15091	847	38469	5		Task duration = 95420 5 out of 11 attempted ProbeText OuterImg InnerImg Response Feedback RT Circle is smaller than square Square Circle true CORRECT 5988 Circle contains square Square Circle false INCORRECT! 4977 Circle is bigger than square Square Circle false CORRECT 5323 Square is encapsulated by circle Square Circle true INCORRECT! 5928 Circle is not bigger than square Square Circle true COR…	1		2017-07-17 17:50:32 UTC	2017-07-17 17:52:13 UTC	Mozilla/5.0 (Macintosh; Intel Mac OS X 10_12_5) AppleWebKit/603.2.4 (KHTML, like Gecko) Version/10.1.1 Safari/603.2.4	Safari	Mac OS X
751	69309	1627	15089	848	38469	6	4	Task duration 132404 MaxScore 6 MeanScore 4 TargetString ResponseString RT Feedback 712 712 4854 CORRECT! 2425 2425 5848 CORRECT! 221527 221527 6698 CORRECT! 6918221 6921821 8924 INCORRECT! 2513512 2513512 7290 CORRECT! 1418813 1418813 7013 CORRECT! 5121172025 5121172025 10322 CORRECT! 411202316121 411201211623 11861 INCORRECT! 951324217 952413217 13153 INCORRECT!	1		2017-07-17 17:49:35 UTC	2017-07-17 17:51:38 UTC	Mozilla/5.0 (Macintosh; Intel Mac OS X 10_12_5) AppleWebKit/603.2.4 (KHTML, like Gecko) Version/10.1.1 Safari/603.2.4	Safari	Mac OS X
751	69355	1627	15111	853	38584	3	2.5	Task duration 211423 AvgCorrect 2.5 MaxScore 3 2.gif 8051 Response 1 of 2 Empty 13.gif 3563 Token 1 of 4 17.gif 22335 Response 1 of 3 Empty 12.gif 4770 Response 2 of 3 Empty 2.gif 1486 Token 2 of 4 12.gif 9009 Token 3 of 4 2.gif 8060 Response 1 of 1 Found ERROR! 5.gif 39430 Token 1 of 3 21.gif 7746 Response 1 of 2 Empty 10.gif 3586 Token 2 of 3 5.gif 16789 Response 1 of 1 Found ERROR! 14.gif 1491…	2		2017-07-21 15:55:06 UTC	2017-07-21 16:03:14 UTC	Mozilla/5.0 (Macintosh; Intel Mac OS X 10_12_5) AppleWebKit/603.2.4 (KHTML, like Gecko) Version/10.1.1 Safari/603.2.4	Safari	Mac OS X
751	69355	1627	15109	851	38584	7	Attempted 11 Errors 3 Max 3 Score 7 CorrectScore 16	Task duration 95733 OverallScore 7 Attempted 11 Errors 3 Max 3 Score 7 CorrectScore 16 TypeOfTrial ShapeTypeRight ShapeTypeLeft CopyingWhichSide Feedback CurrentScore RT Match 4 3 Right CORRECT 1 12486 Mismatch 6 6 Left CORRECT 2 15631 Match 6 4 Right CORRECT 4 12076 Mismatch 6 3 Left CORRECT 6 2798 Mismatch 5 6 Right CORRECT 9 2524 Match 3 5 Left INCORRECT! 6 3133 Match 6 6 Left INCORRECT! 3 563…	1		2017-07-21 15:54:58 UTC	2017-07-21 15:53:02 UTC	Mozilla/5.0 (Macintosh; Intel Mac OS X 10_12_5) AppleWebKit/603.2.4 (KHTML, like Gecko) Version/10.1.1 Safari/603.2.4	Safari	Mac OS X
751	69355	1627	15107	850	38584	3	2.5	Task duration 135411 MaxScore: 3 MeanScore 2.5 TargetString ResponseString RT Feedback 322 322 7193 Correct 513 3 3507 Incorrect 1911 1911 16642 Correct 182123 182123 15916 Correct 21241220 24 2060 Incorrect 20616 20616 17306 Correct 222231 22 6539 Incorrect	1		2017-07-21 15:53:10 UTC	2017-07-21 15:50:38 UTC	Mozilla/5.0 (Macintosh; Intel Mac OS X 10_12_5) AppleWebKit/603.2.4 (KHTML, like Gecko) Version/10.1.1 Safari/603.2.4	Safari	Mac OS X
751	69355	1627	15105	855	38584	10	10	Task duration 187019 Batch: Song: OverallScore 10 DifficultyLevel Feedback MovesMade RT 1 CORRECT! 3 60530 2 CORRECT! 3 56368 3 CORRECT! 4 48836	1		2017-07-21 15:47:55 UTC	2017-07-21 15:47:30 UTC	Mozilla/5.0 (Macintosh; Intel Mac OS X 10_12_5) AppleWebKit/603.2.4 (KHTML, like Gecko) Version/10.1.1 Safari/603.2.4	Safari	Mac OS X
751	69355	1627	15103	844	38584	4	4	Task duration 79812 MaxScore 4 MeanScore 4 TargetString ResponseString RT Feedback 8263 8263 4987 CORRECT! 74968 49764 9121 INCORRECT! 6458 6458 4455 CORRECT! 37514 57314 5821 INCORRECT! 7218 7218 3452 CORRECT! 20197 12796 10904 INCORRECT!	1		2017-07-21 15:45:51 UTC	2017-07-21 15:48:09 UTC	Mozilla/5.0 (Macintosh; Intel Mac OS X 10_12_5) AppleWebKit/603.2.4 (KHTML, like Gecko) Version/10.1.1 Safari/603.2.4	Safari	Mac OS X
751	69355	1627	15101	846	38584	9	Attempted 16 Errors 5 Max 4 Score 9 CorrectScore 28	Task duration 95510 OverallScore 9 Attempted 16 Errors 5 Max 4 Score 9 CorrectScore 28 TrialType FeedbackText.text CurrentScore RT Matched CORRECT 1 3707 Mismatched CORRECT 2 2016 Mismatched CORRECT 4 4216 Matched CORRECT 6 5407 Mismatched INCORRECT! 3 3438 Mismatched CORRECT 6 5109 Mismatched CORRECT 9 2467 Mismatched CORRECT 13 5454 Matched INCORRECT! 9 5104 Mismatched INCORRECT! 5 5694 Matched…	1		2017-07-21 15:40:04 UTC	2017-07-21 15:41:46 UTC	Mozilla/5.0 (Macintosh; Intel Mac OS X 10_12_5) AppleWebKit/603.2.4 (KHTML, like Gecko) Version/10.1.1 Safari/603.2.4	Safari	Mac OS X
751	69355	1627	15099	852	38584	13	Attempted 5 Errors 1 Max 5 Score 13 CorrectScore 18	Task duration: 95257 OverallScore 13 Attempted 5 Errors 1 Max 5 Score 13 CorrectScore 18 TrialType Angle Feedback Score RT Match 90 CORRECT 4 33631 Mismatch 270 CORRECT 8 8276 Mismatch 90 CORRECT 13 9793 Mismatch 90 INCORRECT! 8 15311 Mismatch 90 CORRECT 13 16169	1		2017-07-21 15:37:42 UTC	2017-07-21 15:39:23 UTC	Mozilla/5.0 (Macintosh; Intel Mac OS X 10_12_5) AppleWebKit/603.2.4 (KHTML, like Gecko) Version/10.1.1 Safari/603.2.4	Safari	Mac OS X
751	69355	1627	15097	854	38584	0	0	Task duration 50842 MaxScore 0 MeanScore 0 TargetString ResponseString RT Feedback 12273 73212 5132 INCORRECT! 91115 11156 11410 INCORRECT! 144 142 7040 INCORRECT!	1		2017-07-21 15:39:38 UTC	2017-07-21 15:36:58 UTC	Mozilla/5.0 (Macintosh; Intel Mac OS X 10_12_5) AppleWebKit/603.2.4 (KHTML, like Gecko) Version/10.1.1 Safari/603.2.4	Safari	Mac OS X
751	69355	1627	15095	849	38584	6	Attempted 14 Errors 4 Max 10 Score 6	Task duration 187269 OverallScore 6 Attempted 14 Errors 4 Max 10 Score 6 OddOneOut Selection Correct Level On Responded RT Score 5 5 CORRECT 1 9603 13934 4331 0 2 2 CORRECT 2 15206 23909 8703 1 8 8 CORRECT 3 25319 37158 11839 2 4 4 CORRECT 4 38554 45254 6700 3 4 9 ERROR!! 5 46623 54782 8159 4 8 8 CORRECT 8 56123 67824 11701 3 9 9 CORRECT 7 69207 75143 5936 4 7 7 CORRECT 6 76459 87871 11412 5 9 8 …	1		2017-07-21 15:36:57 UTC	2017-07-21 15:35:19 UTC	Mozilla/5.0 (Macintosh; Intel Mac OS X 10_12_5) AppleWebKit/603.2.4 (KHTML, like Gecko) Version/10.1.1 Safari/603.2.4	Safari	Mac OS X
751	69355	1627	15093	845	38584	4	CC trials 1 IC trials 0.6666666666666666 CI trials 1 II trials 0 CC RT 6699.333333333333 IC RT 8320.333333333334 CI RT 15268.5 II RT 5703	Task duration = 95212 OverallScore 4 CC trials 1 IC trials 0.6666666666666666 CI trials 1 II trials 0 CC RT 6699.333333333333 IC RT 8320.333333333334 CI RT 15268.5 II RT 5703 Problems CorrectAnswer ProbeText ProbeColour RightProbe LeftProbe ResponseChoice Feedback RT IIR Right RED 255 BLUE RED Left INCORRECT! 5295 CCL Left BLUE 255 RED BLUE Left CORRECT 4257 IIL Left RED 255 RED BLUE Right INCORR…	1		2017-07-21 15:33:00 UTC	2017-07-21 15:35:57 UTC	Mozilla/5.0 (Macintosh; Intel Mac OS X 10_12_5) AppleWebKit/603.2.4 (KHTML, like Gecko) Version/10.1.1 Safari/603.2.4	Safari	Mac OS X
751	69355	1627	15091	847	38584	1		Task duration = 95389 1 out of 5 attempted ProbeText OuterImg InnerImg Response Feedback RT Circle is not contained by square Square Circle false INCORRECT! 22155 Square encapsulates circle Square Circle false INCORRECT! 17594 Square is encapsulated by circle Square Circle true CORRECT 19854 Square is contained by circle Square Circle true CORRECT 13363 Circle is bigger than square Square Circle …	1		2017-07-21 15:31:06 UTC	2017-07-21 15:32:49 UTC	Mozilla/5.0 (Macintosh; Intel Mac OS X 10_12_5) AppleWebKit/603.2.4 (KHTML, like Gecko) Version/10.1.1 Safari/603.2.4	Safari	Mac OS X
751	69355	1627	15089	848	38584	4	2.75	Task duration 193108 MaxScore 4 MeanScore 2.75 TargetString ResponseString RT Feedback 724 724 46576 CORRECT! 142215 141522 16081 INCORRECT! 36 36 23354 CORRECT! 81011 81011 9700 CORRECT! 221215 221215 6744 CORRECT! 215221012 210121522 8743 INCORRECT! 1922216 2192216 46581 INCORRECT!	1		2017-07-21 15:26:37 UTC	2017-07-21 15:25:19 UTC	Mozilla/5.0 (Macintosh; Intel Mac OS X 10_12_5) AppleWebKit/603.2.4 (KHTML, like Gecko) Version/10.1.1 Safari/603.2.4	Safari	Mac OS X

## Sheet: DEMOGRAPHICS
S1 Table. Anonymized data set.									Monkey Ladder Test Data																	Grammatical Reasoning Test Data																	Double Trouble Data
ANONYMIZED PATIENT ID	AGE	SEX (M = 1, F = 2)	ICU Diagnosis	ICU Length of Stay [in days]	Days on ventilator at time of consent	NEMS	Location of testing [ICU = 1, Ward = 2]	Duration of testing for those who completed entire battery excluding instructional videos [in minutes]	Monkey Ladder RAW SCORE	Monkey Ladder: Age/ Sex Matched NORM	Monkey Ladder: Age/ Sex Matched SD	Monkey Ladder: Age/ Sex Matched PASS SCORE (Mean - SDx1.5)	Monkey Ladder: Age/ Sex Matched PASS SCORE (Mean - SDx2)	MONKEY LADDER TEST IMPAIRMENT: < 1.5 SD BELOW NORM (YES = 1, NO = 0)	MONKEY LADDER TEST IMPAIRMENT: < 2SD BELOW NORM (YES = 1, NO = 0)	% DEVIATION FROM NORM	Monkey Ladder NORM MEAN	Monkey Ladder norm NORM STDEV	Monkey Ladder patient Z-Score	Monkey Ladder MEMORY WEIGHT	Monkey Ladder Patient MEMORY SCORE (z-score x weight)	Monkey Ladder REASONING WEIGHT	Monkey Ladder Patient REASONING SCORE (z-score x weight)	Monkey Ladder VERBAL WEIGHT	Monkey Ladder Patient VERBAL SCORE (z-score x weight)	Grammatical Reasoning RAW SCORE	Grammatical Reasoning Age/ Sex Matched NORM	Grammatical Reasoning Age/ Sex Matched SD	Grammatical Reasoning Age/ Sex Matched PASS SCORE (Mean - SDx1.5)	Grammatical Reasoning Age/ Sex Matched PASS SCORE (Mean - SDx2)	GRAMMATICAL REASONING IMPAIRED: < 1.5 SD BELOW NORM (YES = 1, NO = 0)	GRAMMATICAL REASONING IMPAIRED: < 2SD BELOW NORM (YES = 1, NO = 0)	% DEVIATION FROM NORM	NORM MEAN	NORM STDEV	Grammatical Reasoning Patient Z-Score	MEMORY WEIGHT	MEMORY SCORE	REASONING WEIGHT	REASONING SCORE	VERBAL WEIGHT	VERBAL SCORE	The Double Trouble Test RAW SCORE	The Double Trouble Test: Age/ Sex NORM	The Double Trouble Test: Age/ Sex SD	The Double Trouble Test: Age/ Sex PASS SCORE (Mean - SDx1.5)	The Double Trouble Test: Age/ Sex PASS SCORE (Mean - SDx2)	DOUBLE TROUBLE: IMPAIRED > 1.5 SD BELOW NORM (YES = 1, NO = 0)	DOUBLE TROUBLE: IMPAIRED > 2SD BELOW NORM (YES = 1, NO = 0)
1	65	1	Perforated viscus	4	3	27	1	23	3	4.25086	0.654177	3.26959	2.9425	1	0	-29.426	7.80895	1.14819	-4.1883	0.398917	-1.67079	-0.0220521	0.0923609	-0.147594	0.61817	1	14.65	4.6192	7.72119	5.41159	1	1	-93.1741	16.8733	5.32761	-2.97943	-0.180517	0.537838	0.0945951	-0.28184	0.488857	-1.45652	-4	17.1418	14.7574	-4.9942	-12.3729	0	0
2	38	1	Traumatic tracheal injury	4	1	18	1	28	6	5.01332	0.663543	4.01801	3.68624	0	0	19.6811	7.80895	1.14819	-1.57548	0.398917	-0.628488	-0.0220521	0.0347428	-0.147594	0.232533	2	16.6279	4.96386	9.18215	6.70022	1	1	-87.972	16.8733	5.32761	-2.79173	-0.180517	0.503955	0.0945951	-0.264084	0.488857	-1.36476	8	27.424	15.0986	4.7761	-2.77319	0	0
3	65	1	Hypercapnic respiratory failure	2	1	27	1	Did not complete entire battery	2	4.25086	0.654177	3.26959	2.9425	1	1	-52.9507	7.80895	1.14819	-5.05924	0.398917	-2.01822	-0.0220521	0.111567	-0.147594	0.746716	7	14.65	4.6192	7.72119	5.41159	1	0	-52.2184	16.8733	5.32761	-1.85322	-0.180517	0.334539	0.0945951	-0.175306	0.488857	-0.905961	4	17.1418	14.7574	-4.9942	-12.3729	0	0
4	43	1	Decreased level of consciousness (fevers, seizure actvity)	5	Data not available at follow-up	18	1	21.5	3	4.91684	0.622208	3.98353	3.67243	1	1	-38.9852	7.80895	1.14819	-4.1883	0.398917	-1.67079	-0.0220521	0.0923609	-0.147594	0.61817	3	16.8651	4.83183	9.61732	7.20141	1	1	-82.2117	16.8733	5.32761	-2.60403	-0.180517	0.470072	0.0945951	-0.246328	0.488857	-1.273	-1	26.6218	14.6493	4.64784	-2.6768	1	0
5	39	2	Trauma with respiratory distress	8	2	36	1	21	0	4.76264	0.634799	3.81044	3.49304	1	1	-100	7.80895	1.14819	-6.80111	0.398917	-2.71308	-0.0220521	0.149979	-0.147594	1.00381	-1	15.8199	5.09203	8.18189	5.63588	1	1	-106.321	16.8733	5.32761	-3.35483	-0.180517	0.605605	0.0945951	-0.317351	0.488857	-1.64003	6	24.4032	15.4435	1.23804	-6.48368	0	0
6	73	2	Hypercapnic respiratory failure	8	3	18	1	22.5	5	4.30694	0.456129	3.62275	3.39469	0	0	16.0916	7.80895	1.14819	-2.44642	0.398917	-0.975921	-0.0220521	0.0539488	-0.147594	0.361078	5	13.25	4.86406	5.95391	3.52188	1	0	-62.2642	16.8733	5.32761	-2.22863	-0.180517	0.402305	0.0945951	-0.210817	0.488857	-1.08948	1	9.75	7.66485	-1.74728	-5.57971	0	0
7	54	2	Increased confusion/ascites	5	1	18	1	27	2	4.38025	0.691029	3.34371	2.9982	1	1	-54.3406	7.80895	1.14819	-5.05924	0.398917	-2.01822	-0.0220521	0.111567	-0.147594	0.746716	0	15.3631	4.57299	8.50358	6.21708	1	1	-100	16.8733	5.32761	-3.16713	-0.180517	0.571722	0.0945951	-0.299595	0.488857	-1.54828	0	17.7862	14.5721	-4.072	-11.3581	0	0
8	55	2	Decreased LOC, urosepsis, query hydronephrosis or septic stone	17	1	25	1	24	4	4.45985	0.668264	3.45745	3.12332	0	0	-10.3108	7.80895	1.14819	-3.31736	0.398917	-1.32335	-0.0220521	0.0731549	-0.147594	0.489624	1	15.6013	5.05755	8.01493	5.48616	1	1	-93.5903	16.8733	5.32761	-2.97943	-0.180517	0.537838	0.0945951	-0.28184	0.488857	-1.45652	6	21.8387	14.3931	0.249018	-6.94755	0	0
9	53	1	Fournier's Gangrene	4	Data not available at follow-up	18	2	24	6	4.64498	0.619	3.71647	3.40697	0	0	29.1718	7.80895	1.14819	-1.57548	0.398917	-0.628488	-0.0220521	0.0347428	-0.147594	0.232533	5	15.7562	4.85236	8.47771	6.05153	1	1	-68.2666	16.8733	5.32761	-2.22863	-0.180517	0.402305	0.0945951	-0.210817	0.488857	-1.08948	2	22.3766	14.189	1.09309	-6.00141	0	0
10	62	1	status post right ling decortication requiring ongoing ventilation	10	1	18	1	25	4	4.45797	0.631059	3.51138	3.19585	0	0	-10.2731	7.80895	1.14819	-3.31736	0.398917	-1.32335	-0.0220521	0.0731549	-0.147594	0.489624	1	14.8495	4.71099	7.78298	5.42748	1	1	-93.2657	16.8733	5.32761	-2.97943	-0.180517	0.537838	0.0945951	-0.28184	0.488857	-1.45652	4	18.3262	12.8852	-1.00154	-7.44412	0	0
11	67	1	Ruptured iliac artery aneurysm	10	4	18	1	22	6	4.41249	0.619766	3.48284	3.17296	0	0	35.9775	7.80895	1.14819	-1.57548	0.398917	-0.628488	-0.0220521	0.0347428	-0.147594	0.232533	5	15.0485	4.54688	8.22823	5.95479	1	1	-66.7742	16.8733	5.32761	-2.22863	-0.180517	0.402305	0.0945951	-0.210817	0.488857	-1.08948	1	21.8252	16.3536	-2.70514	-10.8819	0	0
12	49	2	fluid overload, p-ANCA vasculitis with CHF requiring intubation	3	1	21	2	22	7	4.60536	0.684039	3.5793	3.23728	0	0	51.9967	7.80895	1.14819	-0.704546	0.398917	-0.281056	-0.0220521	0.0155367	-0.147594	0.103987	6	16.1974	5.09129	8.56043	6.01479	1	1	-62.9569	16.8733	5.32761	-2.04092	-0.180517	0.368422	0.0945951	-0.193061	0.488857	-0.99772	6	21.37	14.6778	-0.646649	-7.98555	0	0
13	31	1	Pneumonia requiring intubation (subsequent hypoxic arrest)	Still in ICU at completion of study follow-up	13	NA	1	22	5	5.09593	0.629519	4.15165	3.83689	0	0	-1.88243	7.80895	1.14819	-2.44642	0.398917	-0.975921	-0.0220521	0.0539488	-0.147594	0.361078	5	17.1844	5.20529	9.37643	6.77379	1	1	-70.9038	16.8733	5.32761	-2.22863	-0.180517	0.402305	0.0945951	-0.210817	0.488857	-1.08948	6	29.922	14.9584	7.4845	0.0053278	1	1
14	63	1	Cardiac arrest	11	1	18	1	31.5	5	4.40727	0.695991	3.36329	3.01529	0	0	13.4488	7.80895	1.14819	-2.44642	0.398917	-0.975921	-0.0220521	0.0539488	-0.147594	0.361078	5	15.865	4.31837	9.38747	7.22829	1	1	-68.4841	16.8733	5.32761	-2.22863	-0.180517	0.402305	0.0945951	-0.210817	0.488857	-1.08948	10	21.1455	13.0367	1.59047	-4.92785	0	0
15	62	1	Cardiac arrest	6	3	18	2	Did not complete entire battery	6	4.45797	0.631059	3.51138	3.19585	0	0	34.5904	7.80895	1.14819	-1.57548	0.398917	-0.628488	-0.0220521	0.0347428	-0.147594	0.232533	8	14.8495	4.71099	7.78298	5.42748	0	0	-46.126	16.8733	5.32761	-1.66552	-0.180517	0.300655	0.0945951	-0.15755	0.488857	-0.814202	7	18.3262	12.8852	-1.00154	-7.44412	0	0
16	68	2	Decreased level of consciousness	3	3	18	2	27	6	4.19333	0.567937	3.34143	3.05746	0	0	43.0843	7.80895	1.14819	-1.57548	0.398917	-0.628488	-0.0220521	0.0347428	-0.147594	0.232533	5	14.2778	3.62224	8.84442	7.03329	1	1	-64.9805	16.8733	5.32761	-2.22863	-0.180517	0.402305	0.0945951	-0.210817	0.488857	-1.08948	2	16.0833	13.0195	-3.4459	-9.95565	0	0
17	67	1	Respiratory failure, severe C-diff	5	3	18	2	Did not complete entire battery	5	4.41249	0.619766	3.48284	3.17296	0	0	13.3146	7.80895	1.14819	-2.44642	0.398917	-0.975921	-0.0220521	0.0539488	-0.147594	0.361078	5	15.0485	4.54688	8.22823	5.95479	1	1	-66.7742	16.8733	5.32761	-2.22863	-0.180517	0.402305	0.0945951	-0.210817	0.488857	-1.08948	13	21.8252	16.3536	-2.70514	-10.8819	0	0
18	74	1	Non-ST elevation myocardial infarction & heart failure	4	3	18	1	21	4	4.29444	0.648378	3.32188	2.99769	0	0	-6.8564	7.80895	1.14819	-3.31736	0.398917	-1.32335	-0.0220521	0.0731549	-0.147594	0.489624	7	12	4.58939	5.11592	2.82122	0	0	-41.6667	16.8733	5.32761	-1.85322	-0.180517	0.334539	0.0945951	-0.175306	0.488857	-0.905961	5	12.6061	10.2162	-2.71827	-7.82639	0	0
19	37	1	Acute liver failure (Tylenol overdose)	20	17	18	2	26	5	5.00906	0.63721	4.05324	3.73464	0	0	-0.180874	7.80895	1.14819	-2.44642	0.398917	-0.975921	-0.0220521	0.0539488	-0.147594	0.361078	3	16.8372	5.29449	8.89547	6.24822	1	1	-82.1823	16.8733	5.32761	-2.60403	-0.180517	0.470072	0.0945951	-0.246328	0.488857	-1.273	-1	29.0175	15.0497	6.44304	-1.08178	1	0
20	33	2	Pulmonary embolism	2	2	23	2	24	10	4.85531	0.617529	3.92902	3.62025	0	0	105.96	7.80895	1.14819	1.90827	0.398917	0.761242	-0.0220521	-0.0420814	-0.147594	-0.28165	10	16.4203	5.78695	7.73987	4.84639	0	0	-39.0997	16.8733	5.32761	-1.29012	-0.180517	0.232889	0.0945951	-0.122039	0.488857	-0.630684	35	26.4488	16.9105	1.08306	-7.37218	0	0
[truncated: 177 more columns]

## Sheet: TESTS & DOMAINS
TEST	PRIMARY DOMAIN ASSESSED	SECONDARY DOMAINS ASSESSED
The Monkey Ladder Test	Short-term memory	Reasoning
The Grammatical Reasoning Test	Verbal ability	Reasoning
The Double Trouble Test	Verbal ability	Reasoning & short-term memory
The Odd One Out Test	Reasoning	Short-term memory
The Spatial Span Test	Short-term memory	Reasoning
The Rotation Test	Reasoning	Short-term memory
The Feature Match Test	Reasoning	Short-term memory & verbal ability
The Digit Span Test	Verbal ability	Short-term memory
The Hampshire Tree Test	Reasoning & short-term memory
The Paired Association Test	Short-term memory	Verbal ability
The Polygons Test	Reasoning	Verbal ability
The Spatial Search Test	Short-term memory	Reasoning
Reasoning	Short-term Memory	Verbal
Feature Match	Monkey Ladder	Digit Span
Odd One Out	Paired Associates	Double Trouble
Polygons		Grammatical Reasoning
Rotations	Spatial Span
Spatial Planning	Spatial Planning
